# Supplementary material for: Affinity-based protein profiling of the antiviral natural product nanchangmycin
Source: Royal Society of Chemistry journal article supplement (doi:10.1039/d5cb00126a), 2025-10-21
Supplement: d5cb00126a2.xlsx [file d5cb00126a2.xlsx]

## Sheet: Table S1
								MaxLFQ Intensity						Spectral Count						Unique spectral Count						Total Spectral Count						Intensity
								Nan-Dyne - 1	Nan-Dyne - 2	Nan-Dyne - 3	Nan-Dyne + competition - 1	Nan-Dyne + competition - 2	Nan-Dyne + competition - 3	Nan-Dyne - 1	Nan-Dyne - 2	Nan-Dyne - 3	Nan-Dyne + competition - 1	Nan-Dyne + competition - 2	Nan-Dyne + competition - 3	Nan-Dyne - 1	Nan-Dyne - 2	Nan-Dyne - 3	Nan-Dyne + competition - 1	Nan-Dyne + competition - 2	Nan-Dyne + competition - 3	Nan-Dyne - 1	Nan-Dyne - 2	Nan-Dyne - 3	Nan-Dyne + competition - 1	Nan-Dyne + competition - 2	Nan-Dyne + competition - 3	Nan-Dyne - 1	Nan-Dyne - 2	Nan-Dyne - 3	Nan-Dyne + competition - 1	Nan-Dyne + competition - 2	Nan-Dyne + competition - 3
Gene	Protein	Protein ID	Entry Name	Description	Protein Length	-Log 10 p-value Nan-DYne_Nan-DYne+comp	Log2 Fold change Nan-DYne_Nan-DYne+comp	et220301b_07 MaxLFQ Intensity	et220301b_08 MaxLFQ Intensity	et220301b_09 MaxLFQ Intensity	et220301b_10 MaxLFQ Intensity	et220301b_11 MaxLFQ Intensity	et220301b_12 MaxLFQ Intensity	et220301b_07 Spectral Count	et220301b_08 Spectral Count	et220301b_09 Spectral Count	et220301b_10 Spectral Count	et220301b_11 Spectral Count	et220301b_12 Spectral Count	et220301b_07 Unique Spectral Count	et220301b_08 Unique Spectral Count	et220301b_09 Unique Spectral Count	et220301b_10 Unique Spectral Count	et220301b_11 Unique Spectral Count	et220301b_12 Unique Spectral Count	et220301b_07 Total Spectral Count	et220301b_08 Total Spectral Count	et220301b_09 Total Spectral Count	et220301b_10 Total Spectral Count	et220301b_11 Total Spectral Count	et220301b_12 Total Spectral Count	et220301b_07 Intensity	et220301b_08 Intensity	et220301b_09 Intensity	et220301b_10 Intensity	et220301b_11 Intensity	et220301b_12 Intensity	Indistinguishable Proteins	Protein Probability	Top Peptide Probability	Combined Total Peptides	Combined Spectral Count	Combined Unique Spectral Count	Combined Total Spectral Count	GOBP name	GOMF name	GOCC name	GOBP slim name	GOCC slim name
TMEM126A	sp|Q9H061|T126A_HUMAN	Q9H061	T126A_HUMAN	Transmembrane protein 126A	195	3.44664	2.81574	24.6165	NaN	24.6109	22.0266	21.6243	21.7429	18	1	20	7	7	7	18	1	20	7	7	7	18	1	20	7	7	7	196193104	0	195840160	9574910	11135360	10732710		1	0.999	12	60	60	60	cranial nerve development;optic nerve development;nerve development;developmental process;anatomical structure development		mitochondrion;mitochondrial inner membrane;membrane;integral to membrane;organelle inner membrane;organelle membrane;intrinsic to membrane;mitochondrial membrane;organelle;membrane-bounded organelle;intracellular organelle;intracellular membrane-bounded organelle;organelle part;intracellular part;membrane part;mitochondrial part;cytoplasmic part;intracellular organelle part;cell part	developmental process;anatomical structure development	mitochondrion;membrane;organelle;intracellular organelle;intracellular membrane-bounded organelle;cell part
SEC11A	sp|P67812|SC11A_HUMAN	P67812	SC11A_HUMAN	Signal peptidase complex catalytic subunit SEC11A	179	2.90168	3.23361	28.0071	NaN	27.4229	24.6693	24.2477	24.5273	24	1	22	11	10	13	24	1	22	11	10	13	24	1	22	11	10	13	972382080	0	638104000	51849212	50632160	45817760		1	0.999	8	81	81	81	regulation of peptide secretion;translation;signal peptide processing;peptide metabolic process;protein targeting;protein targeting to membrane;cotranslational protein targeting to membrane;SRP-dependent cotranslational protein targeting to membrane;transport;intracellular protein transport;metabolic process;biosynthetic process;macromolecule biosynthetic process;cellular process;gene expression;…	catalytic activity;peptidase activity;serine-type peptidase activity;hydrolase activity;serine hydrolase activity;peptidase activity, acting on L-amino acid peptides;catalytic activity;peptidase activity;serine-type peptidase activity;hydrolase activity;serine hydrolase activity;peptidase activity, acting on L-amino acid peptides;catalytic activity;peptidase activity;serine-type peptidase activit…	endoplasmic reticulum membrane;membrane;integral to membrane;organelle membrane;intrinsic to membrane;vesicle;membrane-bounded vesicle;organelle;membrane-bounded organelle;extracellular organelle;extracellular region part;organelle part;intracellular part;membrane part;endoplasmic reticulum part;cytoplasmic part;intracellular organelle part;cell part;extracellular membrane-bounded organelle;extra…	translation;peptide metabolic process;protein targeting;transport;metabolic process;biosynthetic process;cellular process;protein transport;protein metabolic process;macromolecule metabolic process;cellular metabolic process;primary metabolic process;regulation of transport;establishment of localization;protein maturation;biological regulation;peptide metabolic process;metabolic process;cellular …	membrane;vesicle;organelle;extracellular organelle;cell part;cell part;cell part;cell part;cell part
TIMM17B	sp|O60830|TI17B_HUMAN	O60830	TI17B_HUMAN	Mitochondrial import inner membrane translocase subunit Tim17-B	172	2.5437	2.15906	24.5703	NaN	24.8296	22.6961	22.2028	22.7237	5	0	8	3	4	3	5	0	8	3	4	3	5	0	8	3	4	3	80832624	0	84496760	17504694	13555846	18920704		1	0.999	7	23	23	23	protein targeting;protein targeting to mitochondrion;transport;mitochondrial transport;intracellular protein transport;metabolic process;cellular process;protein transport;protein import;protein metabolic process;macromolecule metabolic process;cellular metabolic process;primary metabolic process;cellular macromolecule metabolic process;cellular protein metabolic process;establishment of protein …	transporter activity;protein transmembrane transporter activity;protein transporter activity;primary active transmembrane transporter activity;P-P-bond-hydrolysis-driven transmembrane transporter activity;P-P-bond-hydrolysis-driven protein transmembrane transporter activity;active transmembrane transporter activity;transmembrane transporter activity;macromolecule transmembrane transporter activit…	mitochondrial inner membrane;mitochondrial inner membrane presequence translocase complex;membrane;integral to membrane;organelle inner membrane;organelle membrane;intrinsic to membrane;intrinsic to organelle membrane;integral to organelle membrane;intrinsic to mitochondrial inner membrane;integral to mitochondrial inner membrane;mitochondrial membrane;integral to mitochondrial membrane;macromole…	protein targeting;transport;metabolic process;cellular process;protein transport;protein metabolic process;macromolecule metabolic process;cellular metabolic process;primary metabolic process;establishment of localization	mitochondrial inner membrane presequence translocase complex;membrane;macromolecular complex;protein complex;cell part;cell part;cell part
TIMM17A	sp|Q99595|TI17A_HUMAN	Q99595	TI17A_HUMAN	Mitochondrial import inner membrane translocase subunit Tim17-A	171	2.48102	2.20419	25.588	NaN	25.6865	23.5904	23.0426	23.6662	9	0	11	5	6	5	9	0	11	5	6	5	9	0	11	5	6	5	63585760	0	133176824	27961360	18114840	24061018		1	0.999	6	36	36	36	protein targeting;protein targeting to mitochondrion;transport;mitochondrial transport;intracellular protein transport;metabolic process;cellular process;protein transport;protein import;protein metabolic process;macromolecule metabolic process;cellular metabolic process;primary metabolic process;cellular macromolecule metabolic process;cellular protein metabolic process;establishment of protein …	transporter activity;protein transmembrane transporter activity;protein transporter activity;primary active transmembrane transporter activity;P-P-bond-hydrolysis-driven transmembrane transporter activity;P-P-bond-hydrolysis-driven protein transmembrane transporter activity;active transmembrane transporter activity;transmembrane transporter activity;macromolecule transmembrane transporter activit…	mitochondrial inner membrane;mitochondrial inner membrane presequence translocase complex;membrane;integral to membrane;organelle inner membrane;organelle membrane;intrinsic to membrane;intrinsic to organelle membrane;integral to organelle membrane;intrinsic to mitochondrial inner membrane;integral to mitochondrial inner membrane;mitochondrial membrane;integral to mitochondrial membrane;macromole…	protein targeting;transport;metabolic process;cellular process;protein transport;protein metabolic process;macromolecule metabolic process;cellular metabolic process;primary metabolic process;establishment of localization	mitochondrial inner membrane presequence translocase complex;membrane;macromolecular complex;protein complex;cell part;cell part
ALDH3A1	sp|P30838|AL3A1_HUMAN	P30838	AL3A1_HUMAN	Aldehyde dehydrogenase, dimeric NADP-preferring	453	2.13184	0.56115	22.3754	22.3351	22.0425	21.6184	21.7002	21.7508	4	6	4	2	3	3	4	6	4	2	3	3	8	7	5	3	4	4	15534110	17596572	13330636	4399882	4907058	7.0507e+06		1	0.999	6	22	22	31	response to hypoxia;cellular aldehyde metabolic process;response to stress;aging;response to nutrient;metabolic process;positive regulation of cell proliferation;response to external stimulus;response to endogenous stimulus;response to hormone stimulus;cellular process;response to extracellular stimulus;response to organic substance;response to nutrient levels;response to corticosteroid stimulus;…	catalytic activity;3-chloroallyl aldehyde dehydrogenase activity;aldehyde dehydrogenase (NAD) activity;aldehyde dehydrogenase [NAD(P)+] activity;aldo-keto reductase (NADP) activity;alcohol dehydrogenase (NADP+) activity;oxidoreductase activity;oxidoreductase activity, acting on CH-OH group of donors;oxidoreductase activity, acting on the CH-OH group of donors, NAD or NADP as acceptor;oxidoreducta…	extracellular space;nucleoplasm;cytoplasm;endoplasmic reticulum;cytosol;plasma membrane;membrane;organelle;membrane-bounded organelle;intracellular organelle;intracellular membrane-bounded organelle;extracellular region part;organelle part;intracellular part;nuclear part;cytoplasmic part;intracellular organelle part;cell part;nucleoplasm;cytoplasm;organelle;membrane-bounded organelle;intracellula…	cellular aldehyde metabolic process;response to stress;aging;metabolic process;response to external stimulus;response to endogenous stimulus;cellular process;response to extracellular stimulus;developmental process;response to chemical stimulus;response to drug;cellular metabolic process;response to stimulus;biological regulation;cellular aldehyde metabolic process;metabolic process;cellular proc…	extracellular space;nucleoplasm;cytoplasm;endoplasmic reticulum;cytosol;plasma membrane;membrane;organelle;intracellular organelle;intracellular membrane-bounded organelle;cell part;nucleoplasm;cytoplasm;organelle;intracellular organelle;intracellular membrane-bounded organelle;cell part;nucleoplasm;cytoplasm;organelle;intracellular organelle;intracellular membrane-bounded organelle;cell part;nuc…
PPA1	sp|Q15181|IPYR_HUMAN	Q15181	IPYR_HUMAN	Inorganic pyrophosphatase	289	2.00595	1.24018	23.1818	22.6198	22.6842	21.9838	21.3266	21.4548	7	4	6	3	2	2	6	4	5	3	2	2	7	4	6	3	2	2	30668252	16141411	19235318	8.19032e+06	4.19093e+06	4.94389e+06		1	0.999	7	24	22	24	organic acid metabolic process;nucleobase-containing compound metabolic process;tRNA metabolic process;tRNA aminoacylation for protein translation;cellular amino acid metabolic process;phosphorus metabolic process;phosphate-containing compound metabolic process;nitrogen compound metabolic process;metabolic process;amine metabolic process;cellular process;gene expression;RNA metabolic process;carb…	magnesium ion binding;catalytic activity;inorganic diphosphatase activity;binding;pyrophosphatase activity;hydrolase activity;hydrolase activity, acting on acid anhydrides;hydrolase activity, acting on acid anhydrides, in phosphorus-containing anhydrides;ion binding;cation binding;metal ion binding;magnesium ion binding;catalytic activity;inorganic diphosphatase activity;binding;pyrophosphatase a…	cytoplasm;cytosol;vesicle;membrane-bounded vesicle;organelle;membrane-bounded organelle;extracellular organelle;extracellular region part;intracellular part;cytoplasmic part;cell part;extracellular membrane-bounded organelle;extracellular vesicular exosome;cytoplasm;intracellular part;cell part	organic acid metabolic process;nucleobase-containing compound metabolic process;tRNA metabolic process;tRNA aminoacylation for protein translation;cellular amino acid metabolic process;phosphorus metabolic process;nitrogen compound metabolic process;metabolic process;amine metabolic process;cellular process;RNA metabolic process;cellular nitrogen compound metabolic process;cellular ketone metabol…	cytoplasm;cytosol;vesicle;organelle;extracellular organelle;cell part;cytoplasm;cell part
PYCR1	sp|P32322|P5CR1_HUMAN	P32322	P5CR1_HUMAN	Pyrroline-5-carboxylate reductase 1, mitochondrial	319	1.95133	1.5774	23.0007	23.2643	22.5221	21.3258	21.3774	NaN	6	7	2	3	2	1	5	6	1	2	1	1	6	7	2	3	2	1	24766810	33875724	5058014	5969594	2.97633e+06	3.602e+06		1	0.999	7	21	16	21	organic acid metabolic process;cellular amino acid metabolic process;proline metabolic process;proline biosynthetic process;nitrogen compound metabolic process;cellular ion homeostasis;response to stress;response to oxidative stress;metabolic process;cellular amino acid biosynthetic process;biosynthetic process;glutamine family amino acid metabolic process;glutamine family amino acid biosynthetic…	catalytic activity;pyrroline-5-carboxylate reductase activity;binding;protein binding;oxidoreductase activity;oxidoreductase activity, acting on the CH-NH group of donors;oxidoreductase activity, acting on the CH-NH group of donors, NAD or NADP as acceptor;identical protein binding;catalytic activity;pyrroline-5-carboxylate reductase activity;oxidoreductase activity;oxidoreductase activity, actin…	mitochondrion;mitochondrial matrix;membrane-enclosed lumen;organelle;membrane-bounded organelle;intracellular organelle;intracellular membrane-bounded organelle;organelle lumen;organelle part;intracellular part;mitochondrial part;cytoplasmic part;intracellular organelle part;cell part;intracellular organelle lumen	organic acid metabolic process;cellular amino acid metabolic process;nitrogen compound metabolic process;cellular ion homeostasis;response to stress;response to oxidative stress;metabolic process;biosynthetic process;amine metabolic process;cellular process;cellular homeostasis;cellular nitrogen compound metabolic process;cellular ketone metabolic process;response to chemical stimulus;homeostatic…	mitochondrion;organelle;intracellular organelle;intracellular membrane-bounded organelle;cell part
TRAM1	sp|Q15629|TRAM1_HUMAN	Q15629	TRAM1_HUMAN	Translocating chain-associated membrane protein 1	374	1.91401	2.61855	24.7878	NaN	24.837	22.8953	21.6256	22.0606	8	0	9	3	3	3	8	0	9	3	3	3	8	0	9	3	3	3	56184264	0	58994064	10041449	4.56978e+06	6060789		1	0.999	7	26	26	26	translation;protein targeting;protein targeting to membrane;cotranslational protein targeting to membrane;SRP-dependent cotranslational protein targeting to membrane;transport;intracellular protein transport;metabolic process;biosynthetic process;macromolecule biosynthetic process;cellular process;gene expression;protein transport;viral reproduction;protein metabolic process;cellular macromolecul…	receptor activity	endoplasmic reticulum;endoplasmic reticulum membrane;membrane;integral to membrane;organelle membrane;intrinsic to membrane;organelle;membrane-bounded organelle;intracellular organelle;intracellular membrane-bounded organelle;organelle part;intracellular part;membrane part;endoplasmic reticulum part;cytoplasmic part;intracellular organelle part;cell part;integral to membrane;intrinsic to membrane…	translation;protein targeting;transport;metabolic process;biosynthetic process;cellular process;protein transport;viral reproduction;protein metabolic process;macromolecule metabolic process;cellular metabolic process;primary metabolic process;establishment of localization;transport;protein transport;establishment of localization	endoplasmic reticulum;membrane;organelle;intracellular organelle;intracellular membrane-bounded organelle;cell part;cell part;cell part;cell part
HBA2	sp|P69905|HBA_HUMAN	P69905	HBA_HUMAN	Hemoglobin subunit alpha	142	1.85092	2.43032	29.0621	NaN	27.8917	25.9011	26.3207	25.9179	19	2	13	12	12	8	15	1	11	10	10	7	19	2	13	12	12	8	2100759420	6.11641e+06	580480190	169545872	255076320	188881360		1	0.999	7	66	54	66		transporter activity;oxygen transporter activity;binding;iron ion binding;oxygen binding;heme binding;substrate-specific transporter activity;ion binding;cation binding;metal ion binding;tetrapyrrole binding;transition metal ion binding;transporter activity;oxygen transporter activity;binding;iron ion binding;oxygen binding;heme binding;substrate-specific transporter activity;ion binding;cation b…	hemoglobin complex;macromolecular complex;protein complex;intracellular part;cytoplasmic part;cytosolic part;cell part;hemoglobin complex;macromolecular complex;protein complex;intracellular part;cytoplasmic part;cytosolic part;cell part;hemoglobin complex;macromolecular complex;protein complex;intracellular part;cytoplasmic part;cytosolic part;cell part;hemoglobin complex;macromolecular complex;…		macromolecular complex;protein complex;cell part;macromolecular complex;protein complex;cell part;macromolecular complex;protein complex;cell part;macromolecular complex;protein complex;cell part;macromolecular complex;protein complex;cell part;macromolecular complex;protein complex;cell part
TMEM97	sp|Q5BJF2|SGMR2_HUMAN	Q5BJF2	SGMR2_HUMAN	Sigma intracellular receptor 2	176	1.79758	2.34702	24.3469	NaN	24.182	22.6464	21.5906	21.5152	3	1	3	3	2	2	3	1	3	3	2	2	3	1	3	3	2	2	24913544	0	29919680	10600334	4504743	2.71892e+06		1	0.999	2	14	14	14	regulation of cell growth;regulation of growth;homeostatic process;cholesterol homeostasis;chemical homeostasis;regulation of biological process;regulation of cellular process;regulation of cellular component organization;lipid homeostasis;sterol homeostasis;biological regulation;regulation of biological quality		lytic vacuole;lysosome;vacuole;endoplasmic reticulum;rough endoplasmic reticulum;plasma membrane;membrane;integral to membrane;organelle membrane;intrinsic to membrane;nuclear membrane;organelle;membrane-bounded organelle;intracellular organelle;intracellular membrane-bounded organelle;organelle part;intracellular part;membrane part;nuclear part;cytoplasmic part;intracellular organelle part;cell …	homeostatic process;biological regulation	lysosome;vacuole;endoplasmic reticulum;plasma membrane;membrane;organelle;intracellular organelle;intracellular membrane-bounded organelle;cell part;cell part
CLPTM1	sp|O96005|CLPT1_HUMAN	O96005	CLPT1_HUMAN	Putative lipid scramblase CLPTM1	669	1.62233	2.37326	25.7868	NaN	24.4358	23.1117	22.5557	22.5467	27	0	13	6	4	5	27	0	13	6	4	5	27	0	13	6	4	5	213990864	0	69540768	19794224	13087736	8464662		1	0.999	19	55	55	55	regulation of immune system process;regulation of leukocyte activation;multicellular organismal development;cellular process;cell differentiation;multicellular organismal process;developmental process;regulation of T cell differentiation in thymus;regulation of T cell differentiation;regulation of cell differentiation;regulation of lymphocyte differentiation;cellular developmental process;regulat…		integral to plasma membrane;external side of plasma membrane;membrane;integral to membrane;intrinsic to membrane;intrinsic to plasma membrane;membrane part;plasma membrane part;cell part;integral to membrane;intrinsic to membrane;membrane part;cell part;integral to membrane;intrinsic to membrane;membrane part;cell part;integral to membrane;intrinsic to membrane;membrane part;cell part	multicellular organismal development;cellular process;cell differentiation;multicellular organismal process;developmental process;biological regulation	membrane;cell part;cell part;cell part;cell part
CEBPZOS	sp|A8MTT3|CEBOS_HUMAN	A8MTT3	CEBOS_HUMAN	Protein CEBPZOS	80	1.55204	1.21142	24.1485	NaN	23.5715	22.663	22.3551	22.9275	7	0	7	7	5	6	7	0	7	7	5	6	7	0	7	7	5	6	78909736	0	45103280	17729860	4951735	21440830		1	0.9989	4	32	32	32			membrane;integral to membrane;organelle membrane;intrinsic to membrane;mitochondrial membrane;organelle part;intracellular part;membrane part;mitochondrial part;cytoplasmic part;intracellular organelle part;cell part		membrane;cell part
RPL12	sp|P30050|RL12_HUMAN	P30050	RL12_HUMAN	Large ribosomal subunit protein uL11	165	1.5207	0.692673	26.3671	25.9126	25.7662	25.5154	25.1441	25.3082	11	10	10	7	8	7	11	10	10	7	8	7	11	10	10	7	8	7	182148896	127781464	139780928	117883872	90219224	99486512		1	0.999	9	53	53	53	nuclear-transcribed mRNA catabolic process, nonsense-mediated decay;nuclear-transcribed mRNA catabolic process;nucleobase-containing compound metabolic process;RNA catabolic process;mRNA catabolic process;translation;translational initiation;translational elongation;translational termination;protein targeting;protein targeting to membrane;cotranslational protein targeting to membrane;SRP-dependen…	structural constituent of ribosome;structural molecule activity	cytosol;adherens junction;cell-substrate adherens junction;focal adhesion;large ribosomal subunit;membrane;cytosolic large ribosomal subunit;cell junction;cell-substrate junction;ribonucleoprotein complex;vesicle;membrane-bounded vesicle;macromolecular complex;organelle;membrane-bounded organelle;extracellular organelle;extracellular region part;organelle part;intracellular part;cytoplasmic part;…	nucleobase-containing compound metabolic process;RNA catabolic process;translation;translational initiation;translational elongation;protein targeting;nitrogen compound metabolic process;transport;metabolic process;catabolic process;biosynthetic process;cellular process;protein transport;viral reproduction;cellular component organization;RNA metabolic process;mRNA metabolic process;protein metabo…	cytosol;membrane;ribonucleoprotein complex;vesicle;macromolecular complex;organelle;extracellular organelle;cell part
ACTC1	sp|P68032|ACTC_HUMAN	P68032	ACTC_HUMAN	Actin, alpha cardiac muscle 1	377	1.50785	1.16848	29.3156	29.0029	28.3236	28.1129	27.4246	27.5991	21	22	15	16	13	13	0	0	0	0	0	0	101	96	86	82	75	76	1440878590	1142821120	718780610	600946300	342306048	370816608		1	0.999	22	100	0	516	system process;muscle system process;circulatory system process;heart process;apoptosis;cellular component movement;muscle contraction;striated muscle contraction;organelle organization;cytoskeleton organization;actin filament organization;metabolic process;cell death;anatomical structure morphogenesis;cellular process;response to organic substance;cellular component assembly involved in morphoge…	nucleotide binding;catalytic activity;binding;protein binding;ATP binding;cytoskeletal protein binding;pyrophosphatase activity;hydrolase activity;hydrolase activity, acting on acid anhydrides;hydrolase activity, acting on acid anhydrides, in phosphorus-containing anhydrides;ATPase activity;myosin binding;purine nucleotide binding;nucleoside-triphosphatase activity;adenyl nucleotide binding;ribon…	extracellular space;cytoplasm;cytosol;actin filament;adherens junction;cell-substrate adherens junction;focal adhesion;membrane;sarcomere;cell junction;cell-substrate junction;I band;vesicle;membrane-bounded vesicle;macromolecular complex;actomyosin, actin part;organelle;membrane-bounded organelle;extracellular organelle;protein complex;extracellular region part;organelle part;intracellular part;…	circulatory system process;cellular component movement;muscle contraction;organelle organization;cytoskeleton organization;metabolic process;cell death;anatomical structure morphogenesis;cellular process;cellular component organization;death;cellular component assembly;multicellular organismal process;developmental process;response to chemical stimulus;response to drug;anatomical structure format…	extracellular space;cytoplasm;cytosol;membrane;vesicle;macromolecular complex;organelle;extracellular organelle;protein complex;cell part
NNMT	sp|P40261|NNMT_HUMAN	P40261	NNMT_HUMAN	Nicotinamide N-methyltransferase	264	1.48828	0.228002	22.7326	22.6907	22.7401	22.4167	22.5696	NaN	4	2	4	4	2	1	4	2	4	4	2	1	4	2	4	4	2	1	13730965	11187220	7218052	9562452	7.97964e+06	0		1	0.9988	6	17	17	17	one-carbon metabolic process;xenobiotic metabolic process;metabolic process;anatomical structure morphogenesis;response to endogenous stimulus;organ morphogenesis;cellular process;response to organic substance;response to organic nitrogen;regeneration;organ regeneration;methylation;developmental process;response to chemical stimulus;response to drug;cellular metabolic process;small molecule metab…	catalytic activity;nicotinamide N-methyltransferase activity;methyltransferase activity;N-methyltransferase activity;S-adenosylmethionine-dependent methyltransferase activity;transferase activity;transferase activity, transferring one-carbon groups;catalytic activity;methyltransferase activity;transferase activity;transferase activity, transferring one-carbon groups;catalytic activity;nicotinamid…	cytosol;intracellular part;cytoplasmic part;cell part;cytosol;intracellular part;cytoplasmic part;cell part	one-carbon metabolic process;xenobiotic metabolic process;metabolic process;anatomical structure morphogenesis;response to endogenous stimulus;cellular process;developmental process;response to chemical stimulus;response to drug;cellular metabolic process;small molecule metabolic process;response to stimulus;anatomical structure morphogenesis;response to endogenous stimulus;developmental process;…	cytosol;cell part;cytosol;cell part
PSMA6	sp|P60900|PSA6_HUMAN	P60900	PSA6_HUMAN	Proteasome subunit alpha type-6	246	1.48616	0.708973	24.7168	24.3055	24.0238	23.7817	23.469	23.6685	9	8	7	7	7	8	9	8	7	7	7	8	9	8	7	7	7	8	65596700	50850196	45706760	38365448	32567552	36272608		1	0.999	9	46	46	46	G1/S transition of mitotic cell cycle;protein polyubiquitination;mitotic cell cycle;activation of innate immune response;innate immune response activating cell surface receptor signaling pathway;stimulatory C-type lectin receptor signaling pathway;activation of immune response;immune system process;immune response-activating cell surface receptor signaling pathway;antigen processing and presentat…	nucleotide binding;nucleic acid binding;RNA binding;catalytic activity;endopeptidase activity;threonine-type endopeptidase activity;binding;protein binding;transcription factor binding;peptidase activity;hydrolase activity;purine nucleotide binding;ribonucleotide binding;purine ribonucleotide binding;purine ribonucleoside triphosphate binding;NF-kappaB binding;threonine-type peptidase activity;pe…	proteasome complex;cytoplasmic mRNA processing body;nucleus;nucleoplasm;cytoplasm;cytosol;proteasome core complex;polysome;nuclear matrix;proteasome core complex, alpha-subunit complex;myofibril;sarcomere;ribonucleoprotein complex;vesicle;membrane-bounded vesicle;macromolecular complex;RNA granule;organelle;membrane-bounded organelle;non-membrane-bounded organelle;intracellular organelle;extracel…	mitotic cell cycle;immune system process;protein modification process;proteolysis;nitrogen compound metabolic process;response to stress;response to DNA damage stimulus;cell cycle;signal transduction;metabolic process;cell death;catabolic process;cellular process;viral reproduction;death;protein metabolic process;regulation of protein modification process;cellular nitrogen compound metabolic proc…	proteasome complex;nucleus;nucleoplasm;cytoplasm;cytosol;polysome;ribonucleoprotein complex;vesicle;macromolecular complex;organelle;intracellular organelle;extracellular organelle;intracellular membrane-bounded organelle;intracellular non-membrane-bounded organelle;protein complex;cell part;nucleus;nucleoplasm;cytoplasm;macromolecular complex;organelle;intracellular organelle;intracellular membr…
RPL22	sp|P35268|RL22_HUMAN	P35268	RL22_HUMAN	Large ribosomal subunit protein eL22	128	1.47656	0.777992	26.6002	26.0538	25.9384	25.6877	25.2773	25.2934	6	2	6	5	2	5	6	2	6	5	2	5	6	2	6	5	2	5	159272288	108336320	109584520	95141424	65019912	79613968		1	0.999	4	26	26	26	nuclear-transcribed mRNA catabolic process, nonsense-mediated decay;nuclear-transcribed mRNA catabolic process;cell activation;immune system process;leukocyte differentiation;nucleobase-containing compound metabolic process;RNA catabolic process;mRNA catabolic process;translation;translational initiation;translational elongation;translational termination;protein targeting;protein targeting to mem…	pattern binding;nucleic acid binding;RNA binding;structural constituent of ribosome;structural molecule activity;binding;glycosaminoglycan binding;heparin binding;carbohydrate binding;polysaccharide binding;structural constituent of ribosome;structural molecule activity;structural constituent of ribosome;structural molecule activity;structural constituent of ribosome;structural molecule activity;…	nucleus;cytoplasm;cytosol;adherens junction;cell-substrate adherens junction;focal adhesion;large ribosomal subunit;cytosolic large ribosomal subunit;cell junction;cell-substrate junction;ribonucleoprotein complex;vesicle;membrane-bounded vesicle;macromolecular complex;organelle;membrane-bounded organelle;intracellular organelle;extracellular organelle;intracellular membrane-bounded organelle;ext…	cell activation;immune system process;nucleobase-containing compound metabolic process;RNA catabolic process;translation;translational initiation;translational elongation;protein targeting;nitrogen compound metabolic process;transport;metabolic process;catabolic process;biosynthetic process;cellular process;protein transport;viral reproduction;cellular component organization;RNA metabolic process…	nucleus;cytoplasm;cytosol;ribonucleoprotein complex;vesicle;macromolecular complex;organelle;intracellular organelle;extracellular organelle;intracellular membrane-bounded organelle;cell part;ribosome;ribonucleoprotein complex;macromolecular complex;organelle;intracellular organelle;intracellular non-membrane-bounded organelle;cell part;ribosome;ribonucleoprotein complex;macromolecular complex;or…
PCCA	sp|P05165|PCCA_HUMAN	P05165	PCCA_HUMAN	Propionyl-CoA carboxylase alpha chain, mitochondrial	728	1.46142	1.1768	22.5122	23.2484	22.0339	21.4094	21.2159	21.6388	5	9	4	2	5	3	5	9	4	2	5	3	5	9	4	2	5	3	14543123	49603580	12652782	5.19533e+06	5420471	4481747		1	0.999	11	28	28	28	organic acid metabolic process;lipid metabolic process;fatty acid metabolic process;fatty acid beta-oxidation;vitamin metabolic process;water-soluble vitamin metabolic process;biotin metabolic process;sulfur compound metabolic process;nitrogen compound metabolic process;metabolic process;catabolic process;fatty acid catabolic process;cellular process;lipid catabolic process;organic acid catabolic…	nucleotide binding;catalytic activity;biotin carboxylase activity;propionyl-CoA carboxylase activity;binding;protein binding;ATP binding;biotin binding;CoA carboxylase activity;ligase activity;ligase activity, forming carbon-nitrogen bonds;ligase activity, forming carbon-carbon bonds;purine nucleotide binding;vitamin binding;enzyme binding;adenyl nucleotide binding;carboxylic acid binding;ribonuc…	mitochondrial matrix;cytosol;membrane-enclosed lumen;organelle lumen;organelle part;intracellular part;mitochondrial part;cytoplasmic part;intracellular organelle part;cell part;intracellular organelle lumen;extracellular region	organic acid metabolic process;lipid metabolic process;vitamin metabolic process;sulfur compound metabolic process;nitrogen compound metabolic process;metabolic process;catabolic process;cellular process;cellular nitrogen compound metabolic process;cellular ketone metabolic process;cellular amide metabolic process;cellular metabolic process;primary metabolic process;cellular lipid metabolic proce…	cytosol;cell part;extracellular region
HIGD1A	sp|Q9Y241|HIG1A_HUMAN	Q9Y241	HIG1A_HUMAN	HIG1 domain family member 1A, mitochondrial	93	1.45451	2.944	25.3085	22.872	22.5331	20.8889	21.0502	19.9425	4	3	3	2	3	2	4	3	3	2	3	2	4	3	3	2	3	2	90836656	19497900	13911630	2208120	6096759	1.1389e+06		1	0.999	3	17	17	17	metabolic process;regulation of cell death;regulation of apoptosis;negative regulation of apoptosis;regulation of programmed cell death;negative regulation of programmed cell death;negative regulation of biological process;negative regulation of cellular process;regulation of biological process;regulation of cellular process;oxidation-reduction process;negative regulation of cell death;biological…		mitochondrial inner membrane;membrane;integral to membrane;organelle inner membrane;organelle membrane;intrinsic to membrane;mitochondrial membrane;macromolecular complex;protein complex;organelle part;intracellular part;membrane part;mitochondrial part;cytoplasmic part;intracellular organelle part;cell part;respiratory chain;integral to membrane;intrinsic to membrane;membrane part;cell part;inte…	metabolic process;biological regulation	membrane;macromolecular complex;protein complex;cell part;cell part;cell part
PSMA1	sp|P25786|PSA1_HUMAN	P25786	PSA1_HUMAN	Proteasome subunit alpha type-1	263	1.42616	0.636145	23.6558	23.3565	23.1611	22.8652	22.4589	22.9408	8	9	7	7	7	8	8	9	7	7	7	8	8	9	7	7	7	8	50603348	47252008	31377768	24271646	19962192	27538928		1	0.999	9	46	46	46	G1/S transition of mitotic cell cycle;protein polyubiquitination;mitotic cell cycle;activation of innate immune response;innate immune response activating cell surface receptor signaling pathway;stimulatory C-type lectin receptor signaling pathway;activation of immune response;immune system process;immune response-activating cell surface receptor signaling pathway;antigen processing and presentat…	nucleic acid binding;RNA binding;catalytic activity;endopeptidase activity;threonine-type endopeptidase activity;binding;peptidase activity;hydrolase activity;threonine-type peptidase activity;peptidase activity, acting on L-amino acid peptides;catalytic activity;endopeptidase activity;threonine-type endopeptidase activity;peptidase activity;hydrolase activity;threonine-type peptidase activity;pe…	proteasome complex;nucleus;nucleoplasm;cytoplasm;centrosome;microtubule organizing center;cytosol;proteasome core complex;polysome;proteasome core complex, alpha-subunit complex;ribonucleoprotein complex;vesicle;membrane-bounded vesicle;macromolecular complex;organelle;membrane-bounded organelle;non-membrane-bounded organelle;intracellular organelle;extracellular organelle;intracellular membrane-…	mitotic cell cycle;immune system process;protein modification process;proteolysis;nitrogen compound metabolic process;response to stress;response to DNA damage stimulus;cell cycle;signal transduction;metabolic process;cell death;catabolic process;cellular process;viral reproduction;death;protein metabolic process;regulation of protein modification process;cellular nitrogen compound metabolic proc…	proteasome complex;nucleus;nucleoplasm;cytoplasm;centrosome;microtubule organizing center;cytosol;polysome;ribonucleoprotein complex;vesicle;macromolecular complex;organelle;intracellular organelle;extracellular organelle;intracellular membrane-bounded organelle;intracellular non-membrane-bounded organelle;protein complex;cell part;nucleus;nucleoplasm;centrosome;microtubule organizing center;macr…
ZNF207	sp|O43670|ZN207_HUMAN	O43670	ZN207_HUMAN	BUB3-interacting and GLEBS motif-containing protein ZNF207	478	1.42409	0.575078	22.5509	22.4389	22.4233	NaN	21.6911	22.1008	4	6	3	1	3	4	4	6	3	1	3	4	4	6	3	1	3	4	18249734	10938897	10181380	3.21031e+06	8431825	8944046		1	0.999	5	21	21	21	mitotic sister chromatid segregation;cell cycle checkpoint;microtubule cytoskeleton organization;sister chromatid segregation;regulation of transcription, DNA-dependent;organelle organization;cytoskeleton organization;microtubule-based process;chromosome segregation;regulation of mitosis;mitotic cell cycle checkpoint;mitotic cell cycle spindle assembly checkpoint;regulation of mitotic cell cycle;…	nucleic acid binding transcription factor activity;pattern binding;nucleic acid binding;DNA binding;sequence-specific DNA binding transcription factor activity;binding;protein binding;glycosaminoglycan binding;microtubule binding;cytoskeletal protein binding;heparin binding;zinc ion binding;tubulin binding;carbohydrate binding;polysaccharide binding;ion binding;cation binding;metal ion binding;tr…	kinetochore;condensed chromosome kinetochore;nucleus;nucleolus;microtubule;macromolecular complex;organelle;membrane-bounded organelle;non-membrane-bounded organelle;intracellular organelle;intracellular membrane-bounded organelle;intracellular non-membrane-bounded organelle;protein complex;organelle part;intracellular part;chromosomal part;nuclear part;cytoskeletal part;intracellular organelle p…	organelle organization;cytoskeleton organization;chromosome segregation;regulation of mitotic cell cycle;cellular process;cellular component organization;regulation of protein stability;regulation of organelle organization;chromosome organization;cell division;regulation of cell cycle;biological regulation	kinetochore;nucleus;nucleolus;macromolecular complex;organelle;intracellular organelle;intracellular membrane-bounded organelle;intracellular non-membrane-bounded organelle;protein complex;cell part;nucleus;nucleolus;organelle;intracellular organelle;intracellular membrane-bounded organelle;intracellular non-membrane-bounded organelle;cell part
TES	sp|Q9UGI8|TES_HUMAN	Q9UGI8	TES_HUMAN	Testin	421	1.40952	0.544208	21.7093	21.9048	21.7799	21.4362	21.0715	NaN	4	4	4	4	4	1	4	4	4	4	4	1	4	4	4	4	4	1	10347846	8526342	11183382	8179191	6209021	2.34084e+06		1	0.999	4	21	21	21	negative regulation of cell proliferation;regulation of cell proliferation;negative regulation of biological process;negative regulation of cellular process;regulation of biological process;regulation of cellular process;biological regulation;regulation of cell proliferation;regulation of biological process;regulation of cellular process;biological regulation;regulation of cell proliferation;regu…	binding;zinc ion binding;ion binding;cation binding;metal ion binding;transition metal ion binding;binding;zinc ion binding;ion binding;cation binding;metal ion binding;transition metal ion binding;binding;zinc ion binding;ion binding;cation binding;metal ion binding;transition metal ion binding;binding;zinc ion binding;ion binding;cation binding;metal ion binding;transition metal ion binding;bin…	nucleus;cytoplasm;plasma membrane;adherens junction;cell-substrate adherens junction;focal adhesion;membrane;cell junction;cell-substrate junction;macromolecular complex;organelle;membrane-bounded organelle;intracellular organelle;intracellular membrane-bounded organelle;protein complex;intracellular part;cell part;anchoring junction;cytoplasm;plasma membrane;adherens junction;cell-substrate adhe…	biological regulation;biological regulation;biological regulation	nucleus;cytoplasm;plasma membrane;membrane;macromolecular complex;organelle;intracellular organelle;intracellular membrane-bounded organelle;protein complex;cell part;cytoplasm;plasma membrane;membrane;cell part
SSR1	sp|P43307|SSRA_HUMAN	P43307	SSRA_HUMAN	Translocon-associated protein subunit alpha	286	1.40824	4.63559	30.1639	NaN	26.7668	24.1514	23.2585	24.0793	16	1	6	3	4	4	16	1	6	3	4	4	16	1	6	3	4	4	2208601340	2.19885e+06	244317936	35416800	18613068	35768096		1	0.999	5	34	34	34	translation;protein targeting;protein targeting to membrane;cotranslational protein targeting to membrane;SRP-dependent cotranslational protein targeting to membrane;transport;intracellular protein transport;response to stress;ER-nucleus signaling pathway;response to unfolded protein;signal transduction;metabolic process;positive regulation of cell proliferation;biosynthetic process;macromolecule…		endoplasmic reticulum;endoplasmic reticulum membrane;membrane;integral to membrane;organelle membrane;intrinsic to membrane;organelle;membrane-bounded organelle;intracellular organelle;intracellular membrane-bounded organelle;organelle part;intracellular part;membrane part;endoplasmic reticulum part;cytoplasmic part;intracellular organelle part;cell part;endoplasmic reticulum;endoplasmic reticulu…	translation;protein targeting;transport;response to stress;signal transduction;metabolic process;biosynthetic process;cellular process;protein transport;protein metabolic process;response to chemical stimulus;macromolecule metabolic process;cellular metabolic process;primary metabolic process;response to stimulus;establishment of localization;biological regulation	endoplasmic reticulum;membrane;organelle;intracellular organelle;intracellular membrane-bounded organelle;cell part;endoplasmic reticulum;membrane;organelle;intracellular organelle;intracellular membrane-bounded organelle;cell part;endoplasmic reticulum;membrane;organelle;intracellular organelle;intracellular membrane-bounded organelle;cell part;membrane;cell part;membrane;cell part;membrane;cell…
PRDX1	sp|Q06830|PRDX1_HUMAN	Q06830	PRDX1_HUMAN	Peroxiredoxin-1	199	1.40662	0.58357	28.2978	27.9336	27.8815	27.6305	27.1726	27.559	35	28	28	29	30	31	27	22	22	21	24	24	35	28	28	29	30	31	2033795200	1458760960	1429239040	1124932740	675525120	994950080		1	0.999	20	181	140	181	response to reactive oxygen species;response to superoxide;response to oxygen radical;skeletal system development;tissue homeostasis;retina homeostasis;cell killing;leukocyte mediated cytotoxicity;natural killer cell mediated immunity;immune effector process;immune system process;leukocyte mediated immunity;lymphocyte mediated immunity;nucleobase-containing compound metabolic process;transcriptio…	catalytic activity;peroxidase activity;binding;iron ion binding;thioredoxin peroxidase activity;antioxidant activity;oxidoreductase activity;oxidoreductase activity, acting on peroxide as acceptor;oxidoreductase activity, acting on paired donors, with incorporation or reduction of molecular oxygen;heme binding;ion binding;cation binding;metal ion binding;tetrapyrrole binding;transition metal ion …	chromatin;nuclear chromatin;euchromatin;extracellular space;nucleus;nuclear euchromatin;nucleolus;cytoplasm;mitochondrial matrix;peroxisomal matrix;cytosol;cytoplasmic membrane-bounded vesicle;cytoplasmic vesicle;microbody lumen;membrane-enclosed lumen;vesicle;membrane-bounded vesicle;melanosome;organelle;membrane-bounded organelle;non-membrane-bounded organelle;intracellular organelle;extracellu…	cell killing;immune system process;nucleobase-containing compound metabolic process;transcription initiation, DNA-dependent;nitrogen compound metabolic process;response to stress;response to oxidative stress;metabolic process;cell proliferation;catabolic process;biosynthetic process;cellular process;RNA metabolic process;developmental process;cellular nitrogen compound metabolic process;response …	extracellular space;nucleus;nucleolus;cytoplasm;cytosol;cytoplasmic membrane-bounded vesicle;vesicle;organelle;intracellular organelle;extracellular organelle;intracellular membrane-bounded organelle;intracellular non-membrane-bounded organelle;cell part
PSAT1	sp|Q9Y617|SERC_HUMAN	Q9Y617	SERC_HUMAN	Phosphoserine aminotransferase	370	1.39168	0.47289	23.4158	23.2007	23.1315	22.9822	22.5265	22.8206	6	9	8	8	6	7	6	9	8	8	6	7	6	9	8	8	6	7	35064452	24260962	34118416	30199958	12478540	21735240		1	0.999	9	44	44	44	organic acid metabolic process;cellular amino acid metabolic process;L-serine metabolic process;L-serine biosynthetic process;vitamin metabolic process;water-soluble vitamin metabolic process;nitrogen compound metabolic process;metabolic process;pyridoxine metabolic process;pyridoxine biosynthetic process;cellular amino acid biosynthetic process;biosynthetic process;serine family amino acid metab…	catalytic activity;O-phospho-L-serine:2-oxoglutarate aminotransferase activity;binding;transaminase activity;transferase activity;transferase activity, transferring nitrogenous groups;vitamin binding;pyridoxal phosphate binding;cofactor binding;vitamin B6 binding;catalytic activity;O-phospho-L-serine:2-oxoglutarate aminotransferase activity;binding;transaminase activity;transferase activity;trans…	cytoplasm;cytosol;vesicle;membrane-bounded vesicle;organelle;membrane-bounded organelle;extracellular organelle;extracellular region part;intracellular part;cytoplasmic part;cell part;extracellular membrane-bounded organelle;extracellular vesicular exosome	organic acid metabolic process;cellular amino acid metabolic process;vitamin metabolic process;nitrogen compound metabolic process;metabolic process;biosynthetic process;amine metabolic process;cellular process;cellular nitrogen compound metabolic process;cellular ketone metabolic process;cellular metabolic process;primary metabolic process;small molecule metabolic process;heterocycle metabolic p…	cytoplasm;cytosol;vesicle;organelle;extracellular organelle;cell part
DLST	sp|P36957|ODO2_HUMAN	P36957	ODO2_HUMAN	Dihydrolipoyllysine-residue succinyltransferase component of 2-oxoglutarate dehydrogenase complex, mitochondrial	453	1.38146	0.827109	23.5763	23.3996	23.2752	22.8759	NaN	22.3039	7	4	6	5	5	4	7	4	6	5	5	4	7	4	6	5	5	4	33087980	23373450	20131780	5318873	1.06631e+06	11059573		1	0.999	8	31	31	31	organic acid metabolic process;acetyl-CoA metabolic process;generation of precursor metabolites and energy;tricarboxylic acid cycle;cellular amino acid metabolic process;lysine metabolic process;lysine catabolic process;coenzyme metabolic process;nitrogen compound metabolic process;metabolic process;catabolic process;cellular amino acid catabolic process;aspartate family amino acid metabolic proc…	catalytic activity;dihydrolipoyllysine-residue succinyltransferase activity;S-acyltransferase activity;transferase activity;transferase activity, transferring acyl groups;transferase activity, transferring acyl groups other than amino-acyl groups;succinyltransferase activity;S-succinyltransferase activity;catalytic activity;transferase activity;transferase activity, transferring acyl groups;catal…	nucleus;mitochondrial matrix;membrane;membrane-enclosed lumen;vesicle;membrane-bounded vesicle;macromolecular complex;organelle;membrane-bounded organelle;intracellular organelle;extracellular organelle;intracellular membrane-bounded organelle;organelle lumen;protein complex;extracellular region part;organelle part;intracellular part;mitochondrial part;cytoplasmic part;intracellular organelle par…	organic acid metabolic process;generation of precursor metabolites and energy;cellular amino acid metabolic process;nitrogen compound metabolic process;metabolic process;catabolic process;amine metabolic process;cellular process;cellular nitrogen compound metabolic process;cellular ketone metabolic process;cellular metabolic process;primary metabolic process;small molecule metabolic process;cofac…	nucleus;membrane;vesicle;macromolecular complex;organelle;intracellular organelle;extracellular organelle;intracellular membrane-bounded organelle;protein complex;cell part;oxoglutarate dehydrogenase complex;mitochondrion;organelle;intracellular organelle;intracellular membrane-bounded organelle;cell part;mitochondrion;macromolecular complex;organelle;intracellular organelle;intracellular membran…
GOT2	sp|P00505|AATM_HUMAN	P00505	AATM_HUMAN	Aspartate aminotransferase, mitochondrial	430	1.37484	0.35737	23.6205	23.4747	23.3121	23.2651	23.0873	22.9827	7	7	6	7	5	6	7	7	6	7	5	6	7	7	6	7	5	6	40534080	36844248	31077728	24543740	22693260	23236488		1	0.999	10	38	38	38	carbohydrate metabolic process;monosaccharide metabolic process;glucose metabolic process;alcohol metabolic process;organic acid metabolic process;gluconeogenesis;2-oxoglutarate metabolic process;fumarate metabolic process;oxaloacetate metabolic process;cellular amino acid metabolic process;aspartate metabolic process;aspartate biosynthetic process;aspartate catabolic process;glutamate metabolic …	catalytic activity;L-aspartate:2-oxoglutarate aminotransferase activity;binding;transaminase activity;kynurenine-oxoglutarate transaminase activity;transferase activity;transferase activity, transferring nitrogenous groups;vitamin binding;pyridoxal phosphate binding;cofactor binding;vitamin B6 binding;L-phenylalanine aminotransferase activity;L-phenylalanine:2-oxoglutarate aminotransferase activi…	mitochondrion;mitochondrial inner membrane;mitochondrial matrix;plasma membrane;membrane;organelle inner membrane;organelle membrane;mitochondrial membrane;membrane-enclosed lumen;vesicle;membrane-bounded vesicle;organelle;membrane-bounded organelle;intracellular organelle;extracellular organelle;intracellular membrane-bounded organelle;organelle lumen;extracellular region part;organelle part;int…	carbohydrate metabolic process;alcohol metabolic process;organic acid metabolic process;cellular amino acid metabolic process;nitrogen compound metabolic process;transport;lipid transport;metabolic process;catabolic process;biosynthetic process;amine metabolic process;cellular process;organic acid transport;cellular nitrogen compound metabolic process;cellular ketone metabolic process;response to…	mitochondrion;plasma membrane;membrane;vesicle;organelle;intracellular organelle;extracellular organelle;intracellular membrane-bounded organelle;cell part
CNBP	sp|P62633|CNBP_HUMAN	P62633	CNBP_HUMAN	CCHC-type zinc finger nucleic acid binding protein	177	1.37377	0.637782	22.9343	22.4279	22.291	22.0486	21.7344	21.9568	4	3	4	4	3	4	4	3	4	4	3	4	4	3	4	4	3	4	23871604	11190726	14289497	10361308	6.97055e+06	10122348		1	0.999	4	22	22	22	alcohol metabolic process;nucleobase-containing compound metabolic process;transcription, DNA-dependent;regulation of transcription, DNA-dependent;regulation of transcription from RNA polymerase II promoter;lipid metabolic process;steroid biosynthetic process;cholesterol biosynthetic process;nitrogen compound metabolic process;metabolic process;steroid metabolic process;cholesterol metabolic proc…	nucleic acid binding transcription factor activity;nucleic acid binding;DNA binding;single-stranded DNA binding;sequence-specific DNA binding transcription factor activity;RNA binding;single-stranded RNA binding;binding;zinc ion binding;ion binding;cation binding;structure-specific DNA binding;metal ion binding;transition metal ion binding;nucleic acid binding;binding;zinc ion binding;ion binding…	nucleus;endoplasmic reticulum;cytosol;organelle;membrane-bounded organelle;intracellular organelle;intracellular membrane-bounded organelle;intracellular part;cytoplasmic part;cell part	alcohol metabolic process;nucleobase-containing compound metabolic process;lipid metabolic process;nitrogen compound metabolic process;metabolic process;biosynthetic process;cellular process;RNA metabolic process;cellular nitrogen compound metabolic process;macromolecule metabolic process;cellular metabolic process;primary metabolic process;small molecule metabolic process;biological regulation	nucleus;endoplasmic reticulum;cytosol;organelle;intracellular organelle;intracellular membrane-bounded organelle;cell part
GANAB	sp|Q14697|GANAB_HUMAN	Q14697	GANAB_HUMAN	Neutral alpha-glucosidase AB	944	1.36872	0.843011	25.7387	25.7379	24.9823	24.9167	24.547	24.4661	42	45	46	34	35	33	42	45	46	34	35	33	42	45	46	34	35	33	446738752	436284896	287337824	248670128	188922976	193889680		1	0.999	39	235	235	235	carbohydrate metabolic process;protein folding;protein modification process;protein glycosylation;protein N-linked glycosylation;metabolic process;cellular process;peptidyl-amino acid modification;peptidyl-asparagine modification;protein N-linked glycosylation via asparagine;protein metabolic process;macromolecule metabolic process;macromolecule modification;macromolecule glycosylation;post-trans…	catalytic activity;hydrolase activity, hydrolyzing O-glycosyl compounds;alpha-glucosidase activity;binding;glucosidase activity;hydrolase activity;hydrolase activity, acting on glycosyl bonds;carbohydrate binding;glucan 1,3-alpha-glucosidase activity;catalytic activity;hydrolase activity, hydrolyzing O-glycosyl compounds;binding;hydrolase activity;hydrolase activity, acting on glycosyl bonds;carb…	endoplasmic reticulum lumen;Golgi apparatus;membrane;cytoplasmic membrane-bounded vesicle;glucosidase II complex;cytoplasmic vesicle;membrane-enclosed lumen;vesicle;membrane-bounded vesicle;macromolecular complex;melanosome;organelle;membrane-bounded organelle;intracellular organelle;extracellular organelle;intracellular membrane-bounded organelle;organelle lumen;protein complex;extracellular reg…	carbohydrate metabolic process;protein folding;protein modification process;protein glycosylation;metabolic process;cellular process;peptidyl-amino acid modification;protein metabolic process;macromolecule metabolic process;macromolecule modification;cellular metabolic process;primary metabolic process;carbohydrate metabolic process;metabolic process;primary metabolic process;carbohydrate metabol…	Golgi apparatus;membrane;cytoplasmic membrane-bounded vesicle;vesicle;macromolecular complex;organelle;intracellular organelle;extracellular organelle;intracellular membrane-bounded organelle;protein complex;cell part
PNP	sp|P00491|PNPH_HUMAN	P00491	PNPH_HUMAN	Purine nucleoside phosphorylase	289	1.36709	0.837429	22.9037	22.2912	22.6723	22.1894	21.4177	21.7478	9	10	7	9	7	10	9	10	7	9	7	10	9	10	7	9	7	10	35438840	27914080	21536060	13394335	10750474	22446008		1	0.999	10	52	52	52	immune system process;regulation of immune system process;positive regulation of immune system process;regulation of leukocyte activation;positive regulation of leukocyte activation;organic acid metabolic process;nucleobase-containing compound metabolic process;purine base metabolic process;inosine catabolic process;purine nucleoside catabolic process;purine nucleotide metabolic process;purine nu…	nucleoside binding;nucleobase binding;purine base binding;catalytic activity;purine-nucleoside phosphorylase activity;binding;drug binding;transferase activity;transferase activity, transferring glycosyl groups;transferase activity, transferring pentosyl groups;phosphate ion binding;ion binding;anion binding;catalytic activity;catalytic activity;catalytic activity;purine-nucleoside phosphorylase …	intracellular;cytoplasm;cytosol;cytoskeleton;vesicle;membrane-bounded vesicle;organelle;membrane-bounded organelle;non-membrane-bounded organelle;intracellular organelle;extracellular organelle;intracellular non-membrane-bounded organelle;extracellular region part;intracellular part;cytoplasmic part;cell part;extracellular membrane-bounded organelle;extracellular vesicular exosome	immune system process;organic acid metabolic process;nucleobase-containing compound metabolic process;cellular aromatic compound metabolic process;nitrogen compound metabolic process;transport;metabolic process;catabolic process;biosynthetic process;nucleoside metabolic process;nucleotide metabolic process;cellular process;protein transport;cellular nitrogen compound metabolic process;nucleobase-…	intracellular;cytoplasm;cytosol;cytoskeleton;vesicle;organelle;intracellular organelle;extracellular organelle;intracellular non-membrane-bounded organelle;cell part
AKR1C2	sp|P52895|AK1C2_HUMAN	P52895	AK1C2_HUMAN	Aldo-keto reductase family 1 member C2	323	1.36522	0.649176	24.8458	24.5583	24.2784	24.195	23.6847	23.8552	17	14	16	13	10	13	4	3	4	4	3	3	24	19	21	19	15	18	145563472	108005768	107134544	82387712	46052624	74441704		1	0.999	16	83	21	116	organic acid metabolic process;lipid metabolic process;fatty acid metabolic process;icosanoid metabolic process;prostanoid metabolic process;prostaglandin metabolic process;signal transduction;cell surface receptor linked signaling pathway;G-protein coupled receptor protein signaling pathway;digestion;metabolic process;steroid metabolic process;C21-steroid hormone metabolic process;positive regul…	catalytic activity;alditol:NADP+ 1-oxidoreductase activity;aldo-keto reductase (NADP) activity;monooxygenase activity;binding;steroid binding;alcohol dehydrogenase (NADP+) activity;lipid binding;oxidoreductase activity;oxidoreductase activity, acting on CH-OH group of donors;oxidoreductase activity, acting on the CH-OH group of donors, NAD or NADP as acceptor;oxidoreductase activity, acting on th…	cytoplasm;intracellular part;cell part	organic acid metabolic process;lipid metabolic process;signal transduction;digestion;metabolic process;response to endogenous stimulus;cellular process;cell differentiation;multicellular organismal process;developmental process;cellular ketone metabolic process;response to chemical stimulus;hormone metabolic process;cellular metabolic process;primary metabolic process;cellular lipid metabolic pro…	cytoplasm;cell part
EIF3C	sp|Q99613|EIF3C_HUMAN	Q99613	EIF3C_HUMAN	Eukaryotic translation initiation factor 3 subunit C	913	1.3608	0.489364	22.7181	22.8129	22.6063	22.5103	21.9694	22.1894	6	14	9	8	8	7	0	1	1	1	1	1	6	14	9	8	8	7	20211204	37246888	29791146	20854470	11957600	14943338		1	0.999	14	52	5	52	formation of translation preinitiation complex;translation;translational initiation;regulation of translation;regulation of translational initiation;metabolic process;biosynthetic process;macromolecule biosynthetic process;regulation of biosynthetic process;cellular process;gene expression;regulation of gene expression;regulation of macromolecule biosynthetic process;posttranscriptional regulatio…	nucleic acid binding;RNA binding;translation initiation factor activity;binding;translation factor activity, nucleic acid binding;nucleic acid binding;RNA binding;translation initiation factor activity;binding;translation factor activity, nucleic acid binding;nucleic acid binding;RNA binding;translation initiation factor activity;binding;translation factor activity, nucleic acid binding;nucleic a…	cytosol;eukaryotic translation initiation factor 3 complex;eukaryotic 43S preinitiation complex;ribonucleoprotein complex;macromolecular complex;eukaryotic 48S preinitiation complex;protein complex;intracellular part;cytoplasmic part;cell part;translation preinitiation complex;eukaryotic translation initiation factor 3 complex;eukaryotic 43S preinitiation complex;ribonucleoprotein complex;macromo…	translation;translational initiation;regulation of translation;metabolic process;biosynthetic process;cellular process;cellular component organization;protein metabolic process;cellular component assembly;ribonucleoprotein complex assembly;cellular macromolecular complex assembly;macromolecule metabolic process;cellular metabolic process;primary metabolic process;macromolecular complex assembly;b…	cytosol;ribonucleoprotein complex;macromolecular complex;protein complex;cell part;ribonucleoprotein complex;macromolecular complex;protein complex;cell part;macromolecular complex;protein complex;cell part;macromolecular complex;protein complex;cell part;ribonucleoprotein complex;macromolecular complex;protein complex;cell part;ribonucleoprotein complex;macromolecular complex;protein complex;cel…
CSRP1	sp|P21291|CSRP1_HUMAN	P21291	CSRP1_HUMAN	Cysteine and glycine-rich protein 1	193	1.35648	0.787556	25.8402	25.6146	25.0677	24.9516	24.4531	24.7552	12	15	12	11	12	10	12	15	12	11	12	10	12	15	12	11	12	10	195828048	177569424	120215040	109331360	64508848	92592584		1	0.999	10	72	72	72	cell adhesion;cellular process;cell-cell adhesion;biological adhesion;homotypic cell-cell adhesion;platelet aggregation	binding;zinc ion binding;ion binding;cation binding;metal ion binding;transition metal ion binding;binding;zinc ion binding;ion binding;cation binding;metal ion binding;transition metal ion binding;binding;zinc ion binding;ion binding;cation binding;metal ion binding;transition metal ion binding;binding;zinc ion binding;ion binding;cation binding;metal ion binding;transition metal ion binding	nucleus;adherens junction;cell-substrate adherens junction;focal adhesion;cell junction;cell-substrate junction;vesicle;membrane-bounded vesicle;organelle;membrane-bounded organelle;intracellular organelle;extracellular organelle;intracellular membrane-bounded organelle;extracellular region part;intracellular part;cell part;extracellular membrane-bounded organelle;extracellular vesicular exosome;…	cell adhesion;cellular process;biological adhesion	nucleus;vesicle;organelle;intracellular organelle;extracellular organelle;intracellular membrane-bounded organelle;cell part
PSMC4	sp|P43686|PRS6B_HUMAN	P43686	PRS6B_HUMAN	26S proteasome regulatory subunit 6B	418	1.34648	0.610179	23.1072	22.577	22.5596	22.3319	21.943	22.1384	10	7	6	11	8	7	10	7	6	11	8	7	10	7	6	11	8	7	27877160	21028430	11685306	16163713	16141982	17819416		1	0.999	11	49	49	49	G1/S transition of mitotic cell cycle;protein polyubiquitination;mitotic cell cycle;blastocyst development;activation of innate immune response;innate immune response activating cell surface receptor signaling pathway;stimulatory C-type lectin receptor signaling pathway;activation of immune response;immune system process;immune response-activating cell surface receptor signaling pathway;antigen p…	nucleotide binding;catalytic activity;binding;protein binding;ATP binding;transcription factor binding;pyrophosphatase activity;hydrolase activity;hydrolase activity, acting on acid anhydrides;hydrolase activity, acting on acid anhydrides, in phosphorus-containing anhydrides;ATPase activity;TBP-class protein binding;purine nucleotide binding;nucleoside-triphosphatase activity;adenyl nucleotide bi…	proteasome complex;nucleus;nucleoplasm;cytoplasm;cytosol;proteasome regulatory particle, base subcomplex;membrane;inclusion body;proteasome accessory complex;nuclear proteasome complex;cytosolic proteasome complex;macromolecular complex;organelle;membrane-bounded organelle;intracellular organelle;intracellular membrane-bounded organelle;protein complex;organelle part;intracellular part;nuclear pa…	mitotic cell cycle;immune system process;protein modification process;proteolysis;nitrogen compound metabolic process;response to stress;response to DNA damage stimulus;cell cycle;signal transduction;metabolic process;cell death;catabolic process;cellular process;viral reproduction;death;protein metabolic process;regulation of protein modification process;developmental process;cellular nitrogen c…	proteasome complex;nucleus;nucleoplasm;cytoplasm;cytosol;membrane;macromolecular complex;organelle;intracellular organelle;intracellular membrane-bounded organelle;protein complex;cell part;proteasome complex;nucleoplasm;cytoplasm;macromolecular complex;protein complex;cell part
TMEM199	sp|Q8N511|TM199_HUMAN	Q8N511	TM199_HUMAN	Transmembrane protein 199	208	1.34487	1.26778	22.0403	NaN	22.388	NaN	20.7281	21.1647	4	0	9	1	2	3	4	0	9	1	2	3	4	0	9	1	2	3	11944850	0	27980748	0	2.901e+06	6268263		1	0.999	8	19	19	19			integral to membrane;intrinsic to membrane;membrane part;cell part		cell part
PMPCB	sp|O75439|MPPB_HUMAN	O75439	MPPB_HUMAN	Mitochondrial-processing peptidase subunit beta	489	1.34198	0.69749	22.203	21.8488	22.1974	21.7828	21.0537	21.3203	5	4	3	4	3	4	5	4	3	4	3	4	6	5	4	5	4	5	9699617	9024285	8906402	9189305	3736138	3.92417e+06		1	0.9989	9	23	23	29	protein targeting;protein targeting to mitochondrion;transport;mitochondrial transport;intracellular protein transport;metabolic process;cellular process;protein transport;protein import;protein metabolic process;macromolecule metabolic process;cellular metabolic process;primary metabolic process;cellular macromolecule metabolic process;cellular protein metabolic process;establishment of protein …	catalytic activity;endopeptidase activity;metalloendopeptidase activity;binding;peptidase activity;metallopeptidase activity;hydrolase activity;ion binding;cation binding;metal ion binding;peptidase activity, acting on L-amino acid peptides;catalytic activity;endopeptidase activity;metalloendopeptidase activity;binding;peptidase activity;metallopeptidase activity;hydrolase activity;ion binding;ca…	mitochondrial inner membrane;mitochondrial matrix;membrane;organelle inner membrane;organelle membrane;mitochondrial membrane;membrane-enclosed lumen;organelle lumen;organelle part;intracellular part;mitochondrial part;cytoplasmic part;intracellular organelle part;cell part;intracellular organelle lumen	protein targeting;transport;metabolic process;cellular process;protein transport;protein metabolic process;macromolecule metabolic process;cellular metabolic process;primary metabolic process;establishment of localization	membrane;cell part
ADH5	sp|P11766|ADHX_HUMAN	P11766	ADHX_HUMAN	Alcohol dehydrogenase class-3	374	1.33609	0.578838	22.8165	22.1676	22.3594	21.9882	21.7709	21.848	6	6	3	3	5	3	6	6	3	3	5	3	6	6	3	3	5	3	21297438	14080570	12684585	9393960	8855492	5774119		1	0.999	6	26	26	26	retinoid metabolic process;response to molecule of bacterial origin;system process;respiratory system process;alcohol metabolic process;ethanol metabolic process;ethanol catabolic process;ethanol oxidation;cellular aldehyde metabolic process;protein modification process;lipid metabolic process;isoprenoid metabolic process;terpenoid metabolic process;response to stress;aging;respiratory gaseous ex…	catalytic activity;alcohol dehydrogenase (NAD) activity;binding;fatty acid binding;zinc ion binding;lipid binding;electron carrier activity;oxidoreductase activity;oxidoreductase activity, acting on CH-OH group of donors;oxidoreductase activity, acting on the CH-OH group of donors, NAD or NADP as acceptor;oxidoreductase activity, acting on the aldehyde or oxo group of donors, NAD or NADP as accep…	nucleus;mitochondrion;vesicle;membrane-bounded vesicle;organelle;membrane-bounded organelle;intracellular organelle;extracellular organelle;intracellular membrane-bounded organelle;extracellular region part;intracellular part;cytoplasmic part;cell part;extracellular membrane-bounded organelle;extracellular vesicular exosome;nucleus;mitochondrion;organelle;membrane-bounded organelle;intracellular …	alcohol metabolic process;cellular aldehyde metabolic process;protein modification process;lipid metabolic process;response to stress;aging;metabolic process;catabolic process;response to biotic stimulus;cellular process;peptidyl-amino acid modification;protein metabolic process;multicellular organismal process;developmental process;response to chemical stimulus;macromolecule metabolic process;ma…	nucleus;mitochondrion;vesicle;organelle;intracellular organelle;extracellular organelle;intracellular membrane-bounded organelle;cell part;nucleus;mitochondrion;organelle;intracellular organelle;intracellular membrane-bounded organelle;cell part
CCT3	sp|P49368|TCPG_HUMAN	P49368	TCPG_HUMAN	T-complex protein 1 subunit gamma	545	1.33294	0.529299	25.1168	24.878	24.6957	24.6393	24.1716	24.2918	31	31	26	34	24	24	30	30	25	33	23	23	31	31	26	34	24	24	217858752	201180128	234589344	181528224	114022952	139033664		1	0.999	32	170	164	170	protein folding;'de novo' protein folding;binding of sperm to zona pellucida;cell recognition;metabolic process;cellular process;cell-cell recognition;cellular component organization;protein metabolic process;reproductive process;cellular component assembly;sperm-egg recognition;macromolecule metabolic process;cellular metabolic process;primary metabolic process;cellular macromolecule metabolic p…	nucleotide binding;binding;protein binding;ATP binding;purine nucleotide binding;adenyl nucleotide binding;ribonucleotide binding;purine ribonucleotide binding;adenyl ribonucleotide binding;purine ribonucleoside triphosphate binding;unfolded protein binding;nucleotide binding;binding;ATP binding;purine nucleotide binding;adenyl nucleotide binding;ribonucleotide binding;purine ribonucleotide bindi…	cytoplasm;cytosol;chaperonin-containing T-complex;cytoskeleton;microtubule;plasma membrane;membrane;vesicle;membrane-bounded vesicle;macromolecular complex;organelle;membrane-bounded organelle;non-membrane-bounded organelle;intracellular organelle;extracellular organelle;intracellular non-membrane-bounded organelle;protein complex;cell body;extracellular region part;organelle part;intracellular p…	protein folding;cell recognition;metabolic process;cellular process;cellular component organization;protein metabolic process;cellular component assembly;macromolecule metabolic process;cellular metabolic process;primary metabolic process;protein folding;metabolic process;cellular process;protein metabolic process;macromolecule metabolic process;cellular metabolic process;primary metabolic proces…	cytoplasm;cytosol;cytoskeleton;plasma membrane;membrane;vesicle;macromolecular complex;organelle;intracellular organelle;extracellular organelle;intracellular non-membrane-bounded organelle;protein complex;cell body;cell part;cytoplasm;plasma membrane;membrane;cell part
NIBAN2	sp|Q96TA1|NIBA2_HUMAN	Q96TA1	NIBA2_HUMAN	Protein Niban 2	746	1.33284	0.548452	23.5878	23.3934	23.1174	23.0888	22.6967	22.6677	17	17	16	17	18	12	17	17	16	17	18	12	17	17	16	17	18	12	61871176	54500808	41690596	44164888	28532706	24846254		1	0.999	17	97	97	97
PSMB5	sp|P28074|PSB5_HUMAN	P28074	PSB5_HUMAN	Proteasome subunit beta type-5	263	1.33099	0.632765	24.207	23.9997	23.6204	23.5865	23.1215	23.2207	10	10	7	8	7	8	10	10	7	8	7	8	10	10	7	8	7	8	53722308	45025676	28103684	37554720	21145188	24762760		1	0.999	9	50	50	50	G1/S transition of mitotic cell cycle;protein polyubiquitination;mitotic cell cycle;activation of innate immune response;innate immune response activating cell surface receptor signaling pathway;stimulatory C-type lectin receptor signaling pathway;activation of immune response;immune system process;immune response-activating cell surface receptor signaling pathway;antigen processing and presentat…	catalytic activity;endopeptidase activity;threonine-type endopeptidase activity;peptidase activity;hydrolase activity;threonine-type peptidase activity;peptidase activity, acting on L-amino acid peptides;catalytic activity;endopeptidase activity;threonine-type endopeptidase activity;peptidase activity;hydrolase activity;threonine-type peptidase activity;peptidase activity, acting on L-amino acid …	proteasome complex;nucleus;nucleoplasm;cytoplasm;centrosome;microtubule organizing center;cytosol;proteasome core complex;vesicle;membrane-bounded vesicle;macromolecular complex;organelle;membrane-bounded organelle;non-membrane-bounded organelle;intracellular organelle;extracellular organelle;intracellular membrane-bounded organelle;intracellular non-membrane-bounded organelle;protein complex;ext…	mitotic cell cycle;immune system process;protein modification process;proteolysis;nitrogen compound metabolic process;response to stress;response to DNA damage stimulus;response to oxidative stress;cell cycle;signal transduction;metabolic process;cell death;catabolic process;cellular process;viral reproduction;death;protein metabolic process;regulation of protein modification process;cellular nit…	proteasome complex;nucleus;nucleoplasm;cytoplasm;centrosome;microtubule organizing center;cytosol;vesicle;macromolecular complex;organelle;intracellular organelle;extracellular organelle;intracellular membrane-bounded organelle;intracellular non-membrane-bounded organelle;protein complex;cell part;macromolecular complex;protein complex;cell part;nucleus;centrosome;microtubule organizing center;or…
HDLBP	sp|Q00341|VIGLN_HUMAN	Q00341	VIGLN_HUMAN	Vigilin	1268	1.33017	0.629166	23.1321	23.0117	22.5417	22.5009	22.0577	22.2394	14	15	12	12	12	13	14	15	12	12	12	13	14	15	12	12	12	13	51834608	54396148	20601924	32633122	24614752	17494486		1	0.999	21	78	78	78	alcohol metabolic process;lipid metabolic process;transport;lipid transport;metabolic process;steroid metabolic process;cholesterol metabolic process;sterol metabolic process;primary metabolic process;small molecule metabolic process;establishment of localization;organic substance transport	binding;lipid binding;nucleic acid binding;RNA binding;binding;nucleic acid binding;RNA binding;binding;nucleic acid binding;RNA binding;binding;nucleic acid binding;RNA binding;binding;nucleic acid binding;RNA binding;binding;nucleic acid binding;RNA binding;binding;nucleic acid binding;RNA binding;binding;nucleic acid binding;RNA binding;binding;nucleic acid binding;RNA binding;binding;nucleic …	nucleus;cytoplasm;plasma membrane;membrane;macromolecular complex;protein-lipid complex;plasma lipoprotein particle;high-density lipoprotein particle;organelle;membrane-bounded organelle;intracellular organelle;intracellular membrane-bounded organelle;extracellular region part;intracellular part;cell part;cytoplasm;intracellular part;cell part;cytoplasm;intracellular part;cell part	alcohol metabolic process;lipid metabolic process;transport;lipid transport;metabolic process;primary metabolic process;small molecule metabolic process;establishment of localization	nucleus;cytoplasm;plasma membrane;membrane;macromolecular complex;organelle;intracellular organelle;intracellular membrane-bounded organelle;cell part;cytoplasm;cell part;cytoplasm;cell part
PLOD1	sp|Q02809|PLOD1_HUMAN	Q02809	PLOD1_HUMAN	Procollagen-lysine,2-oxoglutarate 5-dioxygenase 1	727	1.32829	0.505495	22.075	21.8569	21.6076	21.3955	21.1181	21.5093	7	7	7	6	6	3	7	7	7	6	6	3	7	7	7	6	6	3	17322628	14267820	7.29335e+06	6047627	6004009	7647594		1	0.999	10	36	36	36	response to hypoxia;organic acid metabolic process;protein modification process;cellular amino acid metabolic process;nitrogen compound metabolic process;response to stress;metabolic process;epidermis development;cellular amino acid biosynthetic process;biosynthetic process;aspartate family amino acid metabolic process;aspartate family amino acid biosynthetic process;amine metabolic process;amine…	catalytic activity;binding;iron ion binding;protein binding;procollagen-lysine 5-dioxygenase activity;oxidoreductase activity;oxidoreductase activity, acting on paired donors, with incorporation or reduction of molecular oxygen;oxidoreductase activity, acting on paired donors, with incorporation or reduction of molecular oxygen, 2-oxoglutarate as one donor, and incorporation of one atom each of o…	endoplasmic reticulum membrane;membrane;rough endoplasmic reticulum membrane;organelle membrane;vesicle;membrane-bounded vesicle;organelle;membrane-bounded organelle;extracellular organelle;extracellular region part;organelle part;intracellular part;membrane part;endoplasmic reticulum part;cytoplasmic part;intracellular organelle part;cell part;extracellular membrane-bounded organelle;extracellul…	organic acid metabolic process;protein modification process;cellular amino acid metabolic process;nitrogen compound metabolic process;response to stress;metabolic process;biosynthetic process;amine metabolic process;cellular process;cellular component organization;protein metabolic process;extracellular matrix organization;developmental process;cellular nitrogen compound metabolic process;cellula…	membrane;vesicle;organelle;extracellular organelle;cell part;endoplasmic reticulum;organelle;intracellular organelle;intracellular membrane-bounded organelle;cell part
EIF3B	sp|P55884|EIF3B_HUMAN	P55884	EIF3B_HUMAN	Eukaryotic translation initiation factor 3 subunit B	814	1.32454	0.519138	23.172	23.0306	22.8421	22.8002	22.2798	22.4073	16	16	12	17	12	14	16	16	12	17	12	14	16	16	12	17	12	14	62800260	55832312	31551852	50301060	15562930	25355316		1	0.999	19	87	87	87	formation of translation preinitiation complex;translation;translational initiation;regulation of translation;regulation of translational initiation;metabolic process;biosynthetic process;macromolecule biosynthetic process;regulation of biosynthetic process;cellular process;gene expression;regulation of gene expression;regulation of macromolecule biosynthetic process;posttranscriptional regulatio…	nucleotide binding;nucleic acid binding;RNA binding;translation initiation factor activity;structural molecule activity;binding;protein binding;translation factor activity, nucleic acid binding;protein complex scaffold;nucleotide binding;nucleic acid binding;RNA binding;translation initiation factor activity;binding;translation factor activity, nucleic acid binding;nucleotide binding;nucleic acid…	nucleoplasm;cytoplasm;cytosol;eukaryotic translation initiation factor 3 complex;eukaryotic 43S preinitiation complex;ribonucleoprotein complex;vesicle;membrane-bounded vesicle;macromolecular complex;eukaryotic 48S preinitiation complex;organelle;membrane-bounded organelle;extracellular organelle;protein complex;extracellular region part;organelle part;intracellular part;nuclear part;cytoplasmic …	translation;translational initiation;regulation of translation;metabolic process;biosynthetic process;cellular process;cellular component organization;protein metabolic process;cellular component assembly;ribonucleoprotein complex assembly;cellular macromolecular complex assembly;macromolecule metabolic process;cellular metabolic process;primary metabolic process;macromolecular complex assembly;b…	nucleoplasm;cytoplasm;cytosol;ribonucleoprotein complex;vesicle;macromolecular complex;organelle;extracellular organelle;protein complex;cell part;ribonucleoprotein complex;macromolecular complex;protein complex;cell part;ribonucleoprotein complex;macromolecular complex;protein complex;cell part;ribonucleoprotein complex;macromolecular complex;protein complex;cell part;macromolecular complex;prot…
NME1	sp|P15531|NDKA_HUMAN	P15531	NDKA_HUMAN	Nucleoside diphosphate kinase A	152	1.31845	0.744057	27.8399	27.3704	27.0881	26.9446	26.4336	26.688	20	22	22	20	15	15	8	8	9	8	6	6	20	22	22	20	15	15	798139580	598281860	497198144	439781760	315525888	402435648		1	0.999	11	114	45	114	cellular glucose homeostasis;regulation of immune system process;regulation of myeloid leukocyte differentiation;negative regulation of myeloid leukocyte differentiation;nucleobase-containing compound metabolic process;purine nucleotide metabolic process;purine nucleotide biosynthetic process;GTP biosynthetic process;pyrimidine nucleoside metabolic process;pyrimidine nucleotide metabolic process;…	nucleotide binding;magnesium ion binding;regulatory region DNA binding;transcription regulatory region sequence-specific DNA binding;RNA polymerase II regulatory region sequence-specific DNA binding;RNA polymerase II regulatory region DNA binding;regulatory region nucleic acid binding;nucleic acid binding;DNA binding;single-stranded DNA binding;catalytic activity;nuclease activity;deoxyribonuclea…	nucleus;cytoplasm;mitochondrion;centrosome;microtubule organizing center;cytosol;intermediate filament;membrane;cell projection membrane;leading edge membrane;vesicle;membrane-bounded vesicle;ruffle membrane;macromolecular complex;organelle;membrane-bounded organelle;non-membrane-bounded organelle;intracellular organelle;extracellular organelle;intracellular membrane-bounded organelle;intracellul…	nucleobase-containing compound metabolic process;DNA metabolic process;nitrogen compound metabolic process;transport;endocytosis;metabolic process;biosynthetic process;nucleoside metabolic process;nucleotide metabolic process;response to endogenous stimulus;cellular process;membrane invagination;nucleobase-containing small molecule interconversion;cellular component organization;cellular membrane…	nucleus;cytoplasm;mitochondrion;centrosome;microtubule organizing center;cytosol;membrane;vesicle;macromolecular complex;organelle;intracellular organelle;extracellular organelle;intracellular membrane-bounded organelle;intracellular non-membrane-bounded organelle;protein complex;cell part
AKR1C3	sp|P42330|AK1C3_HUMAN	P42330	AK1C3_HUMAN	Aldo-keto reductase family 1 member C3	323	1.3139	0.496258	26.6398	26.3781	26.279	26.1731	25.6872	25.9479	24	22	22	23	19	20	11	12	13	11	9	11	24	22	22	23	19	20	313952480	270063680	263172208	266414080	162986320	194165312		1	0.999	17	130	67	130	very long-chain fatty acid metabolic process;protein import into nucleus, translocation;response to reactive oxygen species;retinoid metabolic process;developmental process involved in reproduction;system process;renal system process;alcohol metabolic process;cellular aldehyde metabolic process;organic acid metabolic process;lipid metabolic process;fatty acid metabolic process;icosanoid metabolic…	retinal dehydrogenase activity;catalytic activity;alditol:NADP+ 1-oxidoreductase activity;aldo-keto reductase (NADP) activity;monooxygenase activity;retinol dehydrogenase activity;alcohol dehydrogenase (NADP+) activity;steroid dehydrogenase activity;oxidoreductase activity;oxidoreductase activity, acting on CH-OH group of donors;oxidoreductase activity, acting on the CH-OH group of donors, NAD or…	intracellular;nucleus;cytoplasm;cytosol;vesicle;membrane-bounded vesicle;organelle;membrane-bounded organelle;intracellular organelle;extracellular organelle;intracellular membrane-bounded organelle;extracellular region part;intracellular part;cytoplasmic part;cell part;extracellular membrane-bounded organelle;extracellular vesicular exosome	alcohol metabolic process;cellular aldehyde metabolic process;organic acid metabolic process;lipid metabolic process;vitamin metabolic process;transport;response to stress;response to oxidative stress;cell communication;signal transduction;metabolic process;catabolic process;biosynthetic process;response to external stimulus;response to abiotic stimulus;response to endogenous stimulus;cellular pr…	intracellular;nucleus;cytoplasm;cytosol;vesicle;organelle;intracellular organelle;extracellular organelle;intracellular membrane-bounded organelle;cell part
PDHA1	sp|P08559|ODPA_HUMAN	P08559	ODPA_HUMAN	Pyruvate dehydrogenase E1 component subunit alpha, somatic form, mitochondrial	390	1.31248	0.84656	23.1021	22.9704	22.6916	22.6177	21.7094	21.8973	6	8	9	8	5	3	5	7	8	6	4	3	6	8	9	8	5	3	22958262	30187008	26003086	19091452	6702735	7167735		1	0.999	9	39	33	39	carbohydrate metabolic process;monosaccharide metabolic process;glucose metabolic process;glucose catabolic process;alcohol metabolic process;organic acid metabolic process;acetyl-CoA metabolic process;acetyl-CoA biosynthetic process;acetyl-CoA biosynthetic process from pyruvate;pyruvate metabolic process;generation of precursor metabolites and energy;glycolysis;tricarboxylic acid cycle;coenzyme …	catalytic activity;pyruvate dehydrogenase activity;pyruvate dehydrogenase (acetyl-transferring) activity;oxidoreductase activity;oxidoreductase activity, acting on the aldehyde or oxo group of donors, disulfide as acceptor;oxidoreductase activity, acting on the aldehyde or oxo group of donors;catalytic activity;oxidoreductase activity;oxidoreductase activity, acting on the aldehyde or oxo group o…	nucleus;mitochondrion;mitochondrial matrix;membrane-enclosed lumen;macromolecular complex;organelle;membrane-bounded organelle;intracellular organelle;intracellular membrane-bounded organelle;organelle lumen;protein complex;organelle part;intracellular part;mitochondrial part;cytoplasmic part;intracellular organelle part;cell part;pyruvate dehydrogenase complex;intracellular organelle lumen;organ…	carbohydrate metabolic process;alcohol metabolic process;organic acid metabolic process;generation of precursor metabolites and energy;metabolic process;catabolic process;biosynthetic process;cellular process;cellular ketone metabolic process;cellular metabolic process;primary metabolic process;small molecule metabolic process;cofactor metabolic process;biological regulation;carbohydrate metaboli…	nucleus;mitochondrion;macromolecular complex;organelle;intracellular organelle;intracellular membrane-bounded organelle;protein complex;cell part;pyruvate dehydrogenase complex;organelle;intracellular organelle;intracellular membrane-bounded organelle;cell part
CRYZ	sp|Q08257|QOR_HUMAN	Q08257	QOR_HUMAN	Quinone oxidoreductase	329	1.31221	0.55354	23.9226	24.3357	23.7173	23.5928	23.3631	23.3591	3	2	2	2	2	2	3	2	2	2	2	2	3	2	2	2	2	2	28908602	39453176	4.85663e+06	16792624	20117140	13126919		1	0.9962	4	13	13	13	system process;protein complex assembly;xenobiotic metabolic process;sensory perception;visual perception;metabolic process;catabolic process;cellular process;cellular component organization;cellular component assembly;multicellular organismal process;xenobiotic catabolic process;macromolecular complex subunit organization;cellular metabolic process;cellular catabolic process;neurological system …	nucleotide binding;nucleic acid binding;RNA binding;mRNA binding;mRNA 3'-UTR binding;catalytic activity;NADPH:quinone reductase activity;binding;zinc ion binding;oxidoreductase activity;oxidoreductase activity, acting on NADH or NADPH;oxidoreductase activity, acting on NADH or NADPH, quinone or similar compound as acceptor;ion binding;cation binding;metal ion binding;transition metal ion binding;…	cytoplasm;Golgi apparatus;cytosol;vesicle;membrane-bounded vesicle;organelle;membrane-bounded organelle;intracellular organelle;extracellular organelle;intracellular membrane-bounded organelle;extracellular region part;intracellular part;cytoplasmic part;cell part;extracellular membrane-bounded organelle;extracellular vesicular exosome;cytoplasm;Golgi apparatus;organelle;membrane-bounded organell…	protein complex assembly;xenobiotic metabolic process;metabolic process;catabolic process;cellular process;cellular component organization;cellular component assembly;multicellular organismal process;cellular metabolic process;neurological system process;macromolecular complex assembly	cytoplasm;Golgi apparatus;cytosol;vesicle;organelle;intracellular organelle;extracellular organelle;intracellular membrane-bounded organelle;cell part;cytoplasm;Golgi apparatus;organelle;intracellular organelle;intracellular membrane-bounded organelle;cell part;cytoplasm;Golgi apparatus;organelle;intracellular organelle;intracellular membrane-bounded organelle;cell part
CBX5	sp|P45973|CBX5_HUMAN	P45973	CBX5_HUMAN	Chromobox protein homolog 5	191	1.31185	0.781606	22.877	22.3797	22.4738	22.1728	21.845	21.3679	6	2	4	4	2	4	6	2	4	4	2	4	6	2	4	4	2	4	21058596	6943209	18870312	19257514	4.8895e+06	5474336		1	0.999	6	22	22	22	regulation of transcription, DNA-dependent;blood coagulation;hemostasis;regulation of biosynthetic process;negative regulation of biosynthetic process;negative regulation of metabolic process;regulation of gene expression;regulation of macromolecule biosynthetic process;negative regulation of macromolecule biosynthetic process;negative regulation of macromolecule metabolic process;negative regula…	chromatin binding;binding;protein binding;transcription factor binding;protein binding, bridging;methylated histone residue binding;histone binding;binding, bridging;repressing transcription factor binding	histone deacetylase complex;kinetochore;chromatin;nuclear chromatin;heterochromatin;nucleus;nuclear envelope;nucleoplasm;nuclear heterochromatin;centromeric heterochromatin;nucleolus;chromocenter;chromatin remodeling complex;transcriptional repressor complex;nuclear centromeric heterochromatin;organelle envelope;envelope;macromolecular complex;methyltransferase complex;histone methyltransferase c…	viral reproduction;multicellular organismal process;coagulation;regulation of body fluid levels;biological regulation	kinetochore;nucleus;nuclear envelope;nucleoplasm;nucleolus;chromatin remodeling complex;transcriptional repressor complex;macromolecular complex;histone methyltransferase complex;organelle;intracellular organelle;intracellular membrane-bounded organelle;intracellular non-membrane-bounded organelle;protein complex;cell part;nucleus;organelle;intracellular organelle;intracellular membrane-bounded o…
FKBP4	sp|Q02790|FKBP4_HUMAN	Q02790	FKBP4_HUMAN	Peptidyl-prolyl cis-trans isomerase FKBP4	459	1.31001	0.616233	24.7764	24.3149	24.1758	24.0151	23.5831	23.8202	30	19	21	20	18	20	30	19	21	20	18	20	30	19	21	20	18	20	225653760	116525544	117712968	108160200	63470128	86753920		1	0.999	28	128	128	128	transition metal ion transport;protein peptidyl-prolyl isomerization;developmental process involved in reproduction;protein folding;protein complex assembly;steroid hormone receptor complex assembly;protein modification process;transport;ion transport;cation transport;copper ion transport;response to stress;signal transduction;sex differentiation;embryo implantation;protein localization;metabolic…	nucleotide binding;peptidyl-prolyl cis-trans isomerase activity;catalytic activity;binding;protein binding;ATP binding;GTP binding;macrolide binding;FK506 binding;drug binding;isomerase activity;cis-trans isomerase activity;purine nucleotide binding;guanyl nucleotide binding;adenyl nucleotide binding;protein binding, bridging;heat shock protein binding;ribonucleotide binding;purine ribonucleotide…	nucleoplasm;cytoplasm;mitochondrion;endoplasmic reticulum membrane;cytosol;microtubule;membrane;growth cone;site of polarized growth;organelle membrane;vesicle;membrane-bounded vesicle;macromolecular complex;axon part;neuronal cell body;organelle;membrane-bounded organelle;intracellular organelle;extracellular organelle;intracellular membrane-bounded organelle;protein complex;axonal growth cone;c…	protein folding;protein complex assembly;protein modification process;transport;ion transport;response to stress;signal transduction;metabolic process;response to heat;response to abiotic stimulus;cellular process;cellular component organization;peptidyl-amino acid modification;protein metabolic process;cellular component assembly;developmental process;regulation of organelle organization;cellula…	nucleoplasm;cytoplasm;mitochondrion;cytosol;membrane;site of polarized growth;vesicle;macromolecular complex;neuronal cell body;organelle;intracellular organelle;extracellular organelle;intracellular membrane-bounded organelle;protein complex;cell body;cell part
DDB1	sp|Q16531|DDB1_HUMAN	Q16531	DDB1_HUMAN	DNA damage-binding protein 1	1140	1.30609	0.52749	23.3104	23.2642	23.0293	22.9977	22.4345	22.5892	13	12	9	14	14	10	13	12	9	14	14	10	13	12	9	14	14	10	57308604	57589876	20856898	54774876	31439270	24373368		1	0.999	17	72	72	72	nucleotide-excision repair, DNA damage removal;nucleobase-containing compound metabolic process;DNA metabolic process;DNA repair;nucleotide-excision repair;postreplication repair;DNA catabolic process;chromatin organization;protein modification process;proteolysis;ubiquitin-dependent protein catabolic process;protein monoubiquitination;nitrogen compound metabolic process;response to stress;respon…	nucleic acid binding;DNA binding;damaged DNA binding;binding;nucleic acid binding;binding;nucleic acid binding;binding;nucleic acid binding;binding;nucleic acid binding;binding;nucleic acid binding;binding	ubiquitin ligase complex;extracellular space;nucleus;nucleoplasm;cytoplasm;cullin-RING ubiquitin ligase complex;Cul4A-RING ubiquitin ligase complex;Cul4B-RING ubiquitin ligase complex;vesicle;membrane-bounded vesicle;macromolecular complex;organelle;membrane-bounded organelle;intracellular organelle;extracellular organelle;intracellular membrane-bounded organelle;protein complex;extracellular reg…	nucleobase-containing compound metabolic process;DNA metabolic process;DNA repair;chromatin organization;protein modification process;proteolysis;nitrogen compound metabolic process;response to stress;response to DNA damage stimulus;organelle organization;signal transduction;metabolic process;catabolic process;biosynthetic process;cellular process;viral reproduction;cellular component organizatio…	ubiquitin ligase complex;extracellular space;nucleus;nucleoplasm;cytoplasm;vesicle;macromolecular complex;organelle;intracellular organelle;extracellular organelle;intracellular membrane-bounded organelle;protein complex;cell part;nucleus;organelle;intracellular organelle;intracellular membrane-bounded organelle;cell part;nucleoplasm;cell part;nucleus;organelle;intracellular organelle;intracellul…
SNU13	sp|P55769|NH2L1_HUMAN	P55769	NH2L1_HUMAN	NHP2-like protein 1	128	1.30384	0.756568	24.2133	23.5922	23.6898	23.2594	22.692	23.2742	6	5	5	4	3	4	6	5	5	4	3	4	6	5	5	4	3	4	43799200	21659524	22221242	15128297	12710101	15740418		1	0.999	5	27	27	27
RACK1	sp|P63244|RACK1_HUMAN	P63244	RACK1_HUMAN	Small ribosomal subunit protein RACK1	317	1.29856	0.573759	25.629	25.5986	25.2396	25.2157	24.6464	24.8838	23	23	20	23	25	21	23	23	20	23	25	21	23	23	20	23	25	21	331094656	339061856	213024640	254838560	196541728	165567824		1	0.999	20	135	135	135
GPI	sp|P06744|G6PI_HUMAN	P06744	G6PI_HUMAN	Glucose-6-phosphate isomerase	558	1.29781	0.65933	26.1464	25.6878	25.4379	25.2778	24.879	25.1374	33	33	27	32	24	27	32	32	26	31	22	26	33	33	27	32	24	27	393834720	347258432	238528384	265322304	153813136	236859424		1	0.999	23	176	169	176	angiogenesis;immune system process;system process;carbohydrate metabolic process;monosaccharide metabolic process;glucose metabolic process;alcohol metabolic process;cellular aldehyde metabolic process;gluconeogenesis;nucleobase-containing compound metabolic process;transcription initiation, DNA-dependent;transcription initiation from RNA polymerase II promoter;nitrogen compound metabolic process…	catalytic activity;glucose-6-phosphate isomerase activity;binding;sugar binding;isomerase activity;intramolecular oxidoreductase activity;intramolecular oxidoreductase activity, interconverting aldoses and ketoses;intramolecular transferase activity;carbohydrate binding;monosaccharide binding;catalytic activity;glucose-6-phosphate isomerase activity;isomerase activity;intramolecular oxidoreductas…	extracellular space;nucleoplasm;cytoplasm;cytosol;plasma membrane;membrane;vesicle;membrane-bounded vesicle;cell projection;neuron projection;organelle;membrane-bounded organelle;extracellular organelle;extracellular region part;organelle part;intracellular part;nuclear part;cytoplasmic part;intracellular organelle part;cell part;extracellular membrane-bounded organelle;extracellular vesicular ex…	immune system process;carbohydrate metabolic process;alcohol metabolic process;cellular aldehyde metabolic process;nucleobase-containing compound metabolic process;transcription initiation, DNA-dependent;nitrogen compound metabolic process;behavior;metabolic process;catabolic process;biosynthetic process;cellular process;RNA metabolic process;multicellular organismal process;developmental process…	extracellular space;nucleoplasm;cytoplasm;cytosol;plasma membrane;membrane;vesicle;cell projection;neuron projection;organelle;extracellular organelle;cell part;nucleoplasm;cytoplasm;plasma membrane;membrane;cell part
PABPC1	sp|P11940|PABP1_HUMAN	P11940	PABP1_HUMAN	Polyadenylate-binding protein 1	636	1.29654	0.56354	25.2019	24.8555	24.6318	24.5634	24.1714	24.2639	29	24	25	24	21	22	5	4	5	3	2	4	29	24	25	24	21	22	263146752	203290416	160952880	173353472	121995856	144415632		1	0.999	25	145	23	145	nuclear-transcribed mRNA catabolic process, nonsense-mediated decay;nuclear-transcribed mRNA catabolic process, deadenylation-dependent decay;nuclear-transcribed mRNA poly(A) tail shortening;RNA splicing, via transesterification reactions;RNA splicing, via transesterification reactions with bulged adenosine as nucleophile;nuclear mRNA splicing, via spliceosome;nuclear-transcribed mRNA catabolic p…	nucleotide binding;nucleic acid binding;RNA binding;single-stranded RNA binding;mRNA binding;binding;protein binding;protein C-terminus binding;poly(A) RNA binding;poly-pyrimidine tract binding;poly(U) RNA binding;translation activator activity;translation regulator activity;poly-purine tract binding;translation regulator activity, nucleic acid binding;nucleic acid binding;RNA binding;binding;nuc…	nucleus;spliceosomal complex;cytoplasm;cytosol;adherens junction;cell-substrate adherens junction;focal adhesion;stress granule;membrane;cell junction;cell-substrate junction;ribonucleoprotein complex;vesicle;membrane-bounded vesicle;macromolecular complex;RNA granule;organelle;membrane-bounded organelle;non-membrane-bounded organelle;intracellular organelle;extracellular organelle;intracellular …	nucleobase-containing compound metabolic process;RNA processing;mRNA processing;RNA catabolic process;translation;translational initiation;regulation of translation;nitrogen compound metabolic process;metabolic process;RNA splicing;catabolic process;biosynthetic process;cellular process;RNA metabolic process;mRNA metabolic process;gene silencing;protein metabolic process;cellular nitrogen compoun…	nucleus;spliceosomal complex;cytoplasm;cytosol;membrane;ribonucleoprotein complex;vesicle;macromolecular complex;organelle;intracellular organelle;extracellular organelle;intracellular membrane-bounded organelle;intracellular non-membrane-bounded organelle;cell part;cytoplasm;cell part;cytoplasm;cell part;cytoplasm;cell part;cytoplasm;cell part
KHSRP	sp|Q92945|FUBP2_HUMAN	Q92945	FUBP2_HUMAN	Far upstream element-binding protein 2	711	1.29506	0.64819	23.4309	22.9677	22.8801	22.641	22.1261	22.567	10	6	8	8	6	8	10	6	8	8	6	8	11	8	9	9	7	8	49541456	33030244	22316728	26838496	12263809	23388012		1	0.999	12	46	46	52	RNA splicing, via transesterification reactions;nucleobase-containing compound metabolic process;transcription, DNA-dependent;regulation of transcription, DNA-dependent;RNA processing;mRNA processing;RNA catabolic process;mRNA catabolic process;nitrogen compound metabolic process;transport;metabolic process;RNA splicing;catabolic process;macromolecule catabolic process;biosynthetic process;macrom…	nucleic acid binding;DNA binding;RNA binding;mRNA binding;binding;nucleic acid binding;RNA binding;binding;nucleic acid binding;RNA binding;binding;nucleic acid binding;RNA binding;binding;nucleic acid binding;RNA binding;binding;nucleic acid binding;RNA binding;binding	nucleoplasm;cytosol;stress granule;membrane;ribonucleoprotein complex;macromolecular complex;RNA granule;organelle;non-membrane-bounded organelle;intracellular organelle;intracellular non-membrane-bounded organelle;organelle part;intracellular part;nuclear part;cytoplasmic part;intracellular organelle part;cell part;nucleoplasm;organelle part;intracellular part;nuclear part;intracellular organell…	nucleobase-containing compound metabolic process;RNA processing;mRNA processing;RNA catabolic process;nitrogen compound metabolic process;transport;metabolic process;RNA splicing;catabolic process;biosynthetic process;cellular process;nucleobase-containing compound transport;RNA metabolic process;mRNA metabolic process;cellular nitrogen compound metabolic process;macromolecule metabolic process;c…	nucleoplasm;cytosol;membrane;ribonucleoprotein complex;macromolecular complex;organelle;intracellular organelle;intracellular non-membrane-bounded organelle;cell part;nucleoplasm;cell part;nucleoplasm;cell part
TXNDC17	sp|Q9BRA2|TXD17_HUMAN	Q9BRA2	TXD17_HUMAN	Thioredoxin domain-containing protein 17	123	1.29425	0.864531	23.9872	23.2546	23.0939	22.8766	22.4739	22.3916	3	2	5	3	4	3	3	2	5	3	4	3	3	2	5	3	4	3	24833538	13180894	13797867	12571674	7621697	6648608		1	0.999	3	20	20	20	signal transduction;cell surface receptor linked signaling pathway;metabolic process;cellular process;response to organic substance;cytokine-mediated signaling pathway;tumor necrosis factor-mediated signaling pathway;response to cytokine stimulus;response to tumor necrosis factor;response to chemical stimulus;regulation of biological process;regulation of cellular process;response to stimulus;cel…	catalytic activity;peroxidase activity;electron carrier activity;antioxidant activity;oxidoreductase activity;oxidoreductase activity, acting on NADH or NADPH;oxidoreductase activity, acting on a sulfur group of donors;oxidoreductase activity, acting on a sulfur group of donors, NAD or NADP as acceptor;oxidoreductase activity, acting on peroxide as acceptor;protein-disulfide reductase activity	cytosol;vesicle;membrane-bounded vesicle;organelle;membrane-bounded organelle;extracellular organelle;extracellular region part;intracellular part;cytoplasmic part;cell part;extracellular membrane-bounded organelle;extracellular vesicular exosome	signal transduction;metabolic process;cellular process;response to chemical stimulus;response to stimulus;biological regulation	cytosol;vesicle;organelle;extracellular organelle;cell part
ARPC2	sp|O15144|ARPC2_HUMAN	O15144	ARPC2_HUMAN	Actin-related protein 2/3 complex subunit 2	300	1.28451	0.721915	23.3043	22.6798	22.7688	22.5487	21.9913	22.0472	13	9	9	7	8	7	13	9	9	7	8	7	13	9	9	7	8	7	30806026	17520868	21606390	18381560	10717270	10389169		1	0.999	13	53	53	53	immune system process;cellular component movement;chemotaxis;response to stress;defense response;immune response;organelle organization;cytoskeleton organization;actin filament organization;signal transduction;cell surface receptor linked signaling pathway;enzyme linked receptor protein signaling pathway;transmembrane receptor protein tyrosine kinase signaling pathway;small GTPase mediated signal…	structural molecule activity;structural constituent of cytoskeleton	cytoplasm;endosome;Golgi apparatus;cytosol;cytoskeleton;Arp2/3 protein complex;plasma membrane;adherens junction;cell-substrate adherens junction;focal adhesion;actin cytoskeleton;membrane;cell junction;cell-substrate junction;cell leading edge;vesicle;membrane-bounded vesicle;macromolecular complex;cell projection;neuron projection;organelle;membrane-bounded organelle;non-membrane-bounded organe…	immune system process;cellular component movement;response to stress;organelle organization;cytoskeleton organization;signal transduction;response to external stimulus;cellular process;cellular component organization;regulation of organelle organization;locomotion;response to chemical stimulus;response to stimulus;biological regulation;organelle organization;cytoskeleton organization;cellular pro…	cytoplasm;endosome;Golgi apparatus;cytosol;cytoskeleton;plasma membrane;membrane;cell leading edge;vesicle;macromolecular complex;cell projection;neuron projection;organelle;intracellular organelle;extracellular organelle;intracellular membrane-bounded organelle;intracellular non-membrane-bounded organelle;protein complex;cell part;synapse;macromolecular complex;protein complex;cell part;macromol…
TPD52L2	sp|O43399|TPD54_HUMAN	O43399	TPD54_HUMAN	Tumor protein D54	206	1.27149	1.91433	24.7326	NaN	23.0729	21.9748	21.9986	21.9919	8	1	6	2	3	4	8	1	6	2	3	4	8	1	6	2	3	4	67872736	3.17617e+06	21993108	4.96689e+06	4.8967e+06	7811272		1	0.999	9	24	24	24	regulation of cell proliferation;regulation of biological process;regulation of cellular process;biological regulation	binding;protein binding;identical protein binding;protein homodimerization activity;protein heterodimerization activity;protein dimerization activity	cytoplasm;intracellular part;cytoplasmic part;cell part;perinuclear region of cytoplasm	biological regulation	cytoplasm;cell part
SNRPB	sp|P14678|RSMB_HUMAN	P14678	RSMB_HUMAN	Small nuclear ribonucleoprotein-associated proteins B and B'	240	1.26963	0.878885	23.8014	23.1535	22.8006	22.643	22.3014	22.1744	4	3	2	3	3	2	0	0	0	0	0	0	4	3	2	3	3	2	29398868	16886032	11831429	12653119	9179331	7494494	sp|P63162|RSMN_HUMAN	1	0.999	5	17	0	17	RNA splicing, via transesterification reactions;RNA splicing, via transesterification reactions with bulged adenosine as nucleophile;spliceosomal snRNP assembly;nuclear mRNA splicing, via spliceosome;positive regulation of defense response to virus by host;regulation of immune system process;regulation of immune effector process;regulation of response to biotic stimulus;nucleobase-containing comp…	nucleic acid binding;RNA binding;binding;histone pre-mRNA DCP binding;nucleic acid binding;RNA binding;binding;nucleic acid binding;RNA binding;binding;nucleic acid binding;RNA binding;binding;nucleic acid binding;RNA binding;binding	nucleoplasm;spliceosomal complex;U5 snRNP;U7 snRNP;U2-type spliceosomal complex;U1 snRNP;U2 snRNP;U4 snRNP;U12-type spliceosomal complex;cytosol;ribonucleoprotein complex;small nuclear ribonucleoprotein complex;vesicle;membrane-bounded vesicle;macromolecular complex;methyltransferase complex;methylosome;SMN-Sm protein complex;organelle;membrane-bounded organelle;extracellular organelle;protein co…	nucleobase-containing compound metabolic process;transcription termination, DNA-dependent;transcription from RNA polymerase II promoter;RNA processing;mRNA processing;protein modification process;one-carbon metabolic process;nitrogen compound metabolic process;metabolic process;protein alkylation;RNA splicing;biosynthetic process;cellular process;cellular component organization;RNA metabolic proc…	nucleoplasm;spliceosomal complex;cytosol;ribonucleoprotein complex;small nuclear ribonucleoprotein complex;vesicle;macromolecular complex;organelle;extracellular organelle;protein complex;cell part;nucleus;ribonucleoprotein complex;macromolecular complex;organelle;intracellular organelle;intracellular membrane-bounded organelle;cell part;nucleus;ribonucleoprotein complex;macromolecular complex;or…
RAN	sp|P62826|RAN_HUMAN	P62826	RAN_HUMAN	GTP-binding nuclear protein Ran	216	1.26793	0.554642	26.9825	26.7946	26.5297	26.5114	25.974	26.1575	14	14	12	9	10	17	14	14	12	9	10	17	14	14	12	9	10	17	511907616	458068640	348697920	358702944	252018864	305762240		1	0.999	12	76	76	76	ribosomal subunit export from nucleus;ribosomal large subunit export from nucleus;ribosomal small subunit export from nucleus;protein import into nucleus, translocation;microtubule cytoskeleton organization;nuclear division;developmental process involved in reproduction;nucleobase-containing compound metabolic process;DNA metabolic process;regulation of transcription, DNA-dependent;RNA export fro…	nucleotide binding;protein binding transcription factor activity;transcription factor binding transcription factor activity;chromatin binding;transcription cofactor activity;transcription coactivator activity;catalytic activity;GTPase activity;receptor binding;binding;protein binding;GTP binding;pyrophosphatase activity;hydrolase activity;hydrolase activity, acting on acid anhydrides;hydrolase ac…	nucleus;nuclear pore;nucleoplasm;nucleolus;cytoplasm;endosome;centriole;cytosol;membrane;cytoplasmic membrane-bounded vesicle;midbody;nucleocytoplasmic shuttling complex;cytoplasmic vesicle;vesicle;membrane-bounded vesicle;macromolecular complex;melanosome;RNA nuclear export complex;organelle;membrane-bounded organelle;non-membrane-bounded organelle;intracellular organelle;extracellular organelle…	ribosomal subunit export from nucleus;nuclear division;nucleobase-containing compound metabolic process;DNA metabolic process;protein targeting;nitrogen compound metabolic process;transport;nucleocytoplasmic transport;organelle organization;cytoskeleton organization;mitosis;signal transduction;metabolic process;cellular process;protein transport;nucleobase-containing compound transport;viral repr…	nucleus;nuclear pore;nucleoplasm;nucleolus;cytoplasm;endosome;cytosol;membrane;cytoplasmic membrane-bounded vesicle;midbody;nucleocytoplasmic shuttling complex;vesicle;macromolecular complex;organelle;intracellular organelle;extracellular organelle;intracellular membrane-bounded organelle;intracellular non-membrane-bounded organelle;protein complex;cell part;intracellular;membrane;cell part
FABP5	sp|Q01469|FABP5_HUMAN	Q01469	FABP5_HUMAN	Fatty acid-binding protein 5	135	1.2679	0.998734	25.0649	24.317	24.9401	24.3116	23.6901	23.324	8	7	7	7	6	6	7	7	7	7	6	6	8	7	7	7	6	6	107286240	48448728	70608144	32874194	28908952	21405344		1	0.999	8	41	40	41	carbohydrate metabolic process;monosaccharide metabolic process;glucose metabolic process;alcohol metabolic process;cellular biogenic amine metabolic process;lipid metabolic process;neutral lipid metabolic process;acylglycerol metabolic process;triglyceride metabolic process;phospholipid metabolic process;glycerophospholipid metabolic process;phosphatidylcholine biosynthetic process;glycerol ethe…	transporter activity;binding;fatty acid binding;lipid binding;carboxylic acid binding;monocarboxylic acid binding;transporter activity;binding;fatty acid binding;lipid binding;carboxylic acid binding;monocarboxylic acid binding;transporter activity;binding;lipid binding	nucleoplasm;cytoplasm;cytosol;vesicle;membrane-bounded vesicle;organelle;membrane-bounded organelle;extracellular organelle;extracellular region part;organelle part;intracellular part;nuclear part;cytoplasmic part;intracellular organelle part;cell part;extracellular membrane-bounded organelle;extracellular vesicular exosome	carbohydrate metabolic process;alcohol metabolic process;lipid metabolic process;glycerol ether metabolic process;nitrogen compound metabolic process;transport;response to stress;metabolic process;carbohydrate transport;catabolic process;biosynthetic process;amine metabolic process;cellular process;developmental process;cellular nitrogen compound metabolic process;cellular metabolic process;prima…	nucleoplasm;cytoplasm;cytosol;vesicle;organelle;extracellular organelle;cell part
RPL37A	sp|P61513|RL37A_HUMAN	P61513	RL37A_HUMAN	Large ribosomal subunit protein eL43	92	1.25527	0.415407	22.742	22.9571	22.699	22.5837	22.1313	22.4367	4	4	5	5	4	5	2	2	3	4	2	4	4	4	5	5	4	5	14686793	16147964	17224868	17184226	8744332	14060787		1	0.999	6	27	17	27	nuclear-transcribed mRNA catabolic process, nonsense-mediated decay;nuclear-transcribed mRNA catabolic process;nucleobase-containing compound metabolic process;RNA catabolic process;mRNA catabolic process;translation;translational initiation;translational elongation;translational termination;protein targeting;protein targeting to membrane;cotranslational protein targeting to membrane;SRP-dependen…	structural constituent of ribosome;structural molecule activity;binding;ion binding;cation binding;metal ion binding;structural constituent of ribosome;structural molecule activity;structural constituent of ribosome;structural molecule activity;structural constituent of ribosome;structural molecule activity;structural constituent of ribosome;structural molecule activity;structural constituent of …	nucleus;cytosol;adherens junction;cell-substrate adherens junction;focal adhesion;large ribosomal subunit;cytosolic large ribosomal subunit;cell junction;cell-substrate junction;ribonucleoprotein complex;vesicle;membrane-bounded vesicle;macromolecular complex;organelle;membrane-bounded organelle;intracellular organelle;extracellular organelle;intracellular membrane-bounded organelle;extracellular…	nucleobase-containing compound metabolic process;RNA catabolic process;translation;translational initiation;translational elongation;protein targeting;nitrogen compound metabolic process;transport;metabolic process;catabolic process;biosynthetic process;cellular process;protein transport;viral reproduction;cellular component organization;RNA metabolic process;mRNA metabolic process;protein metabo…	nucleus;cytosol;ribonucleoprotein complex;vesicle;macromolecular complex;organelle;intracellular organelle;extracellular organelle;intracellular membrane-bounded organelle;cell part;ribosome;ribonucleoprotein complex;macromolecular complex;organelle;intracellular organelle;intracellular non-membrane-bounded organelle;cell part;ribosome;ribonucleoprotein complex;macromolecular complex;organelle;in…
ACTG1	sp|P63261|ACTG_HUMAN	P63261	ACTG_HUMAN	Actin, cytoplasmic 2	375	1.25464	1.20693	26.9992	26.456	25.9736	25.4089	25.1299	NaN	11	8	5	6	6	3	11	8	5	6	6	3	186	153	145	136	126	125	121538944	79521440	61276592	54967808	44525924	43397808		1	0.999	33	39	39	871	tissue homeostasis;retina homeostasis;immune system process;cellular component movement;chemotaxis;response to stress;defense response;immune response;organelle organization;cytoskeleton organization;cell adhesion;signal transduction;cell surface receptor linked signaling pathway;enzyme linked receptor protein signaling pathway;transmembrane receptor protein tyrosine kinase signaling pathway;smal…	nucleotide binding;structural molecule activity;structural constituent of cytoskeleton;binding;protein binding;ATP binding;purine nucleotide binding;enzyme binding;adenyl nucleotide binding;ubiquitin protein ligase binding;ribonucleotide binding;purine ribonucleotide binding;adenyl ribonucleotide binding;purine ribonucleoside triphosphate binding;identical protein binding;nucleotide binding;bindi…	extracellular space;nucleus;cytosol;cytoskeleton;plasma membrane;membrane;myofibril;filamentous actin;vesicle;membrane-bounded vesicle;macromolecular complex;organelle;membrane-bounded organelle;non-membrane-bounded organelle;intracellular organelle;extracellular organelle;intracellular membrane-bounded organelle;intracellular non-membrane-bounded organelle;protein complex;contractile fiber;extra…	immune system process;cellular component movement;response to stress;organelle organization;cytoskeleton organization;cell adhesion;signal transduction;response to external stimulus;cellular process;cellular component organization;cellular component assembly;biological adhesion;cell junction organization;locomotion;response to chemical stimulus;homeostatic process;response to stimulus;membrane or…	extracellular space;nucleus;cytosol;cytoskeleton;plasma membrane;membrane;vesicle;macromolecular complex;organelle;intracellular organelle;extracellular organelle;intracellular membrane-bounded organelle;intracellular non-membrane-bounded organelle;protein complex;cell part
ZYX	sp|Q15942|ZYX_HUMAN	Q15942	ZYX_HUMAN	Zyxin	572	1.25273	0.457809	23.3426	23.0494	22.8399	22.7138	22.4387	22.7058	6	9	6	10	5	5	6	9	6	10	5	5	6	9	6	10	5	5	35586668	38535016	17420688	25020962	16218369	22433200		1	0.999	8	41	41	41	organelle organization;cytoskeleton organization;actin filament organization;cell communication;cell adhesion;cell-matrix adhesion;signal transduction;cell surface receptor linked signaling pathway;enzyme linked receptor protein signaling pathway;transmembrane receptor protein serine/threonine kinase signaling pathway;transforming growth factor beta receptor signaling pathway;integrin-mediated si…	binding;zinc ion binding;ion binding;cation binding;metal ion binding;transition metal ion binding;binding;zinc ion binding;ion binding;cation binding;metal ion binding;transition metal ion binding;binding;zinc ion binding;ion binding;cation binding;metal ion binding;transition metal ion binding;binding;zinc ion binding;ion binding;cation binding;metal ion binding;transition metal ion binding;bin…	stress fiber;nucleus;cytoplasm;plasma membrane;integral to plasma membrane;cell-cell junction;adherens junction;cell-cell adherens junction;cell-substrate adherens junction;focal adhesion;membrane;integral to membrane;cell junction;cell-substrate junction;intrinsic to membrane;intrinsic to plasma membrane;actin filament bundle;actomyosin;organelle;membrane-bounded organelle;intracellular organell…	organelle organization;cytoskeleton organization;cell communication;cell adhesion;signal transduction;cell-cell signaling;cellular process;viral reproduction;cellular component organization;cellular component assembly;biological adhesion;signaling;response to stimulus;biological regulation	nucleus;cytoplasm;plasma membrane;membrane;organelle;intracellular organelle;intracellular membrane-bounded organelle;cell part;cytoplasm;cell part
MAT2A	sp|P31153|METK2_HUMAN	P31153	METK2_HUMAN	S-adenosylmethionine synthase isoform type-2	395	1.24869	0.669872	23.4131	23.066	22.9727	22.7249	22.0558	22.6614	10	11	9	9	11	8	9	10	8	8	10	7	10	11	9	9	11	8	37414784	29750526	26947798	24076348	16283613	26834122		1	0.999	16	58	52	58	organic acid metabolic process;nucleobase-containing compound metabolic process;cellular amino acid metabolic process;S-adenosylmethionine biosynthetic process;cellular modified amino acid metabolic process;one-carbon metabolic process;coenzyme metabolic process;sulfur compound metabolic process;xenobiotic metabolic process;nitrogen compound metabolic process;metabolic process;cellular amino acid…	nucleotide binding;catalytic activity;methionine adenosyltransferase activity;binding;ATP binding;transferase activity;transferase activity, transferring alkyl or aryl (other than methyl) groups;purine nucleotide binding;adenyl nucleotide binding;ribonucleotide binding;purine ribonucleotide binding;adenyl ribonucleotide binding;purine ribonucleoside triphosphate binding;ion binding;cation binding…	cytosol;macromolecular complex;protein complex;intracellular part;cytoplasmic part;cell part;methionine adenosyltransferase complex	organic acid metabolic process;nucleobase-containing compound metabolic process;cellular amino acid metabolic process;one-carbon metabolic process;sulfur compound metabolic process;xenobiotic metabolic process;nitrogen compound metabolic process;metabolic process;biosynthetic process;nucleoside metabolic process;amine metabolic process;cellular process;cellular nitrogen compound metabolic process…	cytosol;macromolecular complex;protein complex;cell part
GLRX3	sp|O76003|GLRX3_HUMAN	O76003	GLRX3_HUMAN	Glutaredoxin-3	335	1.24107	0.62664	22.498	21.8443	22.1015	21.7219	21.2478	21.5941	3	3	4	4	4	2	3	3	4	4	4	2	3	3	4	4	4	2	10930349	11725589	10957766	9329472	3034912	1.68636e+06		1	0.999	4	20	20	20	regulation of the force of heart contraction;regulation of heart contraction;cellular process;regulation of cardiac muscle hypertrophy;negative regulation of cardiac muscle hypertrophy;negative regulation of muscle hypertrophy;regulation of muscle hypertrophy;cellular homeostasis;homeostatic process;regulation of muscle adaptation;regulation of system process;cell redox homeostasis;negative regul…	catalytic activity;binding;electron carrier activity;protein disulfide oxidoreductase activity;disulfide oxidoreductase activity;oxidoreductase activity;oxidoreductase activity, acting on a sulfur group of donors;ion binding;cation binding;metal ion binding;iron-sulfur cluster binding;metal cluster binding	cell cortex;Z disc;vesicle;membrane-bounded vesicle;organelle;membrane-bounded organelle;extracellular organelle;extracellular region part;organelle part;intracellular part;cytoplasmic part;contractile fiber part;cell part;extracellular membrane-bounded organelle;extracellular vesicular exosome	cellular process;cellular homeostasis;homeostatic process;biological regulation	cell cortex;vesicle;organelle;extracellular organelle;cell part
NPTN	sp|Q9Y639|NPTN_HUMAN	Q9Y639	NPTN_HUMAN	Neuroplastin	398	1.23811	1.8215	27.4817	NaN	25.8971	25.045	24.6631	24.8955	17	0	11	10	11	9	17	0	11	10	11	9	17	0	11	10	11	9	467923424	0	146911376	76847312	59076908	68129528		1	0.999	9	58	58	58	regulation of protein phosphorylation;positive regulation of protein phosphorylation;cellular ion homeostasis;cellular calcium ion homeostasis;cellular metal ion homeostasis;cell adhesion;homophilic cell adhesion;signal transduction;cell surface receptor linked signaling pathway;enzyme linked receptor protein signaling pathway;transmembrane receptor protein tyrosine kinase signaling pathway;eleva…	catalytic activity;protein kinase activity;protein tyrosine kinase activity;transmembrane receptor protein tyrosine kinase activity;signal transducer activity;receptor activity;transmembrane signaling receptor activity;receptor binding;fibroblast growth factor receptor binding;type 1 fibroblast growth factor receptor binding;binding;protein binding;kinase activity;transferase activity;transferase…	cell surface;membrane;integral to membrane;intrinsic to membrane;presynaptic membrane;membrane part;synapse part;cell part;synaptic membrane	cellular ion homeostasis;cell adhesion;signal transduction;cellular process;cellular homeostasis;biological adhesion;regulation of protein modification process;homeostatic process;response to stimulus;biological regulation	cell surface;membrane;cell part
TTLL12	sp|Q14166|TTL12_HUMAN	Q14166	TTL12_HUMAN	Tubulin--tyrosine ligase-like protein 12	644	1.23255	0.56416	22.73	22.6788	22.2113	22.2267	21.7517	21.9491	11	10	7	8	8	6	11	10	7	8	8	6	11	10	7	8	8	6	29004770	32849156	23200404	17938806	12908684	14450833		1	0.999	11	50	50	50	protein modification process;metabolic process;cellular process;protein metabolic process;macromolecule metabolic process;macromolecule modification;cellular metabolic process;primary metabolic process;cellular macromolecule metabolic process;cellular protein metabolic process;protein modification process;metabolic process;cellular process;protein metabolic process;macromolecule metabolic process…	catalytic activity;ligase activity		protein modification process;metabolic process;cellular process;protein metabolic process;macromolecule metabolic process;macromolecule modification;cellular metabolic process;primary metabolic process;protein modification process;metabolic process;cellular process;protein metabolic process;macromolecule metabolic process;macromolecule modification;cellular metabolic process;primary metabolic pro…
PABPC4	sp|Q13310|PABP4_HUMAN	Q13310	PABP4_HUMAN	Polyadenylate-binding protein 4	644	1.23117	0.454706	23.4081	23.1776	23.163	23.0897	22.5689	22.726	7	7	10	10	6	12	6	6	9	8	5	11	18	18	18	20	15	20	35561616	34136440	38501816	36210448	23660596	33889364		1	0.999	21	52	45	109	nucleobase-containing compound metabolic process;RNA processing;RNA catabolic process;translation;nitrogen compound metabolic process;blood coagulation;hemostasis;metabolic process;catabolic process;macromolecule catabolic process;biosynthetic process;macromolecule biosynthetic process;cellular process;RNA metabolic process;protein metabolic process;multicellular organismal process;cellular nitro…	nucleotide binding;nucleic acid binding;RNA binding;single-stranded RNA binding;mRNA binding;binding;poly(A) RNA binding;poly-pyrimidine tract binding;poly(U) RNA binding;poly-purine tract binding;nucleotide binding;nucleic acid binding;RNA binding;binding;nucleotide binding;nucleic acid binding;binding;nucleotide binding;nucleic acid binding;binding;nucleotide binding;nucleic acid binding;bindin…	nucleus;cytoplasm;stress granule;ribonucleoprotein complex;macromolecular complex;RNA granule;organelle;membrane-bounded organelle;non-membrane-bounded organelle;intracellular organelle;intracellular membrane-bounded organelle;intracellular non-membrane-bounded organelle;intracellular part;cytoplasmic part;cell part;cytoplasm;intracellular part;cell part;cytoplasm;intracellular part;cell part;cyt…	nucleobase-containing compound metabolic process;RNA processing;RNA catabolic process;translation;nitrogen compound metabolic process;metabolic process;catabolic process;biosynthetic process;cellular process;RNA metabolic process;protein metabolic process;multicellular organismal process;cellular nitrogen compound metabolic process;macromolecule metabolic process;cellular metabolic process;primar…	nucleus;cytoplasm;ribonucleoprotein complex;macromolecular complex;organelle;intracellular organelle;intracellular membrane-bounded organelle;intracellular non-membrane-bounded organelle;cell part;cytoplasm;cell part;cytoplasm;cell part;cytoplasm;cell part
JAGN1	sp|Q8N5M9|JAGN1_HUMAN	Q8N5M9	JAGN1_HUMAN	Protein jagunal homolog 1	183	1.22614	3.0502	26.0149	NaN	23.3193	21.9347	21.3336	21.5823	7	1	6	3	3	2	7	1	6	3	3	2	7	1	6	3	3	2	185383248	913898	26617290	5.4819e+06	3.64619e+06	4253859		1	0.999	4	22	22	22	immune effector process;immune system process;leukocyte mediated immunity;myeloid leukocyte mediated immunity;neutrophil mediated immunity;leukocyte differentiation;myeloid leukocyte differentiation;transport;exocytosis;response to stress;defense response;organelle organization;endoplasmic reticulum organization;response to biotic stimulus;response to fungus;cellular process;protein transport;cel…		endoplasmic reticulum;endoplasmic reticulum membrane;membrane;integral to membrane;organelle membrane;intrinsic to membrane;organelle;membrane-bounded organelle;intracellular organelle;intracellular membrane-bounded organelle;organelle part;intracellular part;membrane part;endoplasmic reticulum part;cytoplasmic part;intracellular organelle part;cell part;endoplasmic reticulum membrane;membrane;or…	immune system process;transport;exocytosis;response to stress;organelle organization;endoplasmic reticulum organization;response to biotic stimulus;cellular process;protein transport;cellular component organization;vesicle-mediated transport;cell differentiation;developmental process;secretion;response to stimulus;establishment of localization;multi-organism process;organelle organization;endopla…	endoplasmic reticulum;membrane;organelle;intracellular organelle;intracellular membrane-bounded organelle;cell part;membrane;cell part
VTN	sp|P04004|VTNC_HUMAN	P04004	VTNC_HUMAN	Vitronectin	478	1.22436	1.10342	23.5411	23.5441	22.5731	22.6448	21.7304	21.9728	2	2	2	2	3	2	2	2	2	2	3	2	2	2	2	2	3	2	16208704	14228118	8692645	8222392	4271783	5053204		0.9998	0.999	2	13	13	13	regulation of protein phosphorylation;positive regulation of protein phosphorylation;immune system process;regulation of acute inflammatory response;regulation of immune system process;regulation of immune effector process;regulation of humoral immune response;response to stress;defense response;immune response;cell adhesion;cell-matrix adhesion;positive regulation of metabolic process;regulation…	pattern binding;receptor activity;scavenger receptor activity;receptor binding;integrin binding;binding;protein binding;glycosaminoglycan binding;heparin binding;carbohydrate binding;polysaccharide binding;protein complex binding;cargo receptor activity;extracellular matrix binding;pattern binding;receptor activity;scavenger receptor activity;binding;carbohydrate binding;polysaccharide binding;ca…	extracellular region;proteinaceous extracellular matrix;extracellular space;extracellular matrix;vesicle;membrane-bounded vesicle;macromolecular complex;organelle;membrane-bounded organelle;extracellular organelle;protein complex;extracellular region part;membrane part;plasma membrane part;cell part;extracellular membrane-bounded organelle;extracellular vesicular exosome;alphav-beta3 integrin-vit…	immune system process;response to stress;cell adhesion;cellular process;cellular component organization;biological adhesion;cell differentiation;extracellular matrix organization;regulation of protein modification process;developmental process;extracellular structure organization;response to stimulus;regulation of transport;biological regulation;immune system process;cell adhesion;cellular proces…	extracellular region;proteinaceous extracellular matrix;extracellular space;extracellular matrix;vesicle;macromolecular complex;organelle;extracellular organelle;protein complex;cell part;proteinaceous extracellular matrix;extracellular matrix
PDLIM7	sp|Q9NR12|PDLI7_HUMAN	Q9NR12	PDLI7_HUMAN	PDZ and LIM domain protein 7	457	1.22221	0.557088	21.787	21.9574	22.0907	21.5903	NaN	21.1856	5	6	2	4	2	5	5	6	2	4	2	5	5	6	2	4	2	5	6941308	8783144	5352964	7396656	1.96754e+06	5489444		1	0.999	7	24	24	24	ossification;transport;endocytosis;receptor-mediated endocytosis;organelle organization;cytoskeleton organization;multicellular organismal development;cellular process;membrane invagination;cellular component organization;cellular membrane organization;vesicle-mediated transport;actin filament-based process;actin cytoskeleton organization;cell differentiation;regulation of ossification;multicellu…	binding;zinc ion binding;ion binding;cation binding;metal ion binding;transition metal ion binding	stress fiber;ruffle;nucleus;cytoplasm;cytoskeleton;adherens junction;cell-substrate adherens junction;focal adhesion;actin cytoskeleton;cell junction;cell-substrate junction;actin filament bundle;actomyosin;cell projection;organelle;membrane-bounded organelle;non-membrane-bounded organelle;intracellular organelle;intracellular membrane-bounded organelle;intracellular non-membrane-bounded organell…	transport;endocytosis;organelle organization;cytoskeleton organization;multicellular organismal development;cellular process;membrane invagination;cellular component organization;cellular membrane organization;vesicle-mediated transport;cell differentiation;multicellular organismal process;developmental process;establishment of localization;membrane organization;biological regulation	nucleus;cytoplasm;cytoskeleton;cell projection;organelle;intracellular organelle;intracellular membrane-bounded organelle;intracellular non-membrane-bounded organelle;cell part
DYNLL1	sp|P63167|DYL1_HUMAN	P63167	DYL1_HUMAN	Dynein light chain 1, cytoplasmic	89	1.21813	0.905397	23.9447	23.7385	23.4288	23.4294	22.4761	22.4904	4	6	3	3	2	4	0	1	0	0	0	1	4	6	3	3	2	4	30862794	28409696	18353872	18160880	8864938	13342832		1	0.999	5	22	2	22	G2/M transition of mitotic cell cycle;mitotic cell cycle;immune system process;antigen processing and presentation of exogenous peptide antigen;antigen processing and presentation of peptide antigen via MHC class II;antigen processing and presentation of peptide or polysaccharide antigen via MHC class II;nucleobase-containing compound metabolic process;transcription, DNA-dependent;regulation of t…	motor activity;catalytic activity;pyrophosphatase activity;hydrolase activity;hydrolase activity, acting on acid anhydrides;hydrolase activity, acting on acid anhydrides, in phosphorus-containing anhydrides;nucleoside-triphosphatase activity;enzyme regulator activity;nitric-oxide synthase regulator activity	kinetochore;nucleus;cytoplasm;mitochondrion;centrosome;microtubule organizing center;spindle;cytosol;cytoplasmic dynein complex;microtubule;microtubule associated complex;plasma membrane;cilium;membrane;dynein complex;vesicle;membrane-bounded vesicle;macromolecular complex;cell projection;organelle;membrane-bounded organelle;non-membrane-bounded organelle;intracellular organelle;extracellular org…	mitotic cell cycle;immune system process;nucleobase-containing compound metabolic process;nitrogen compound metabolic process;transport;organelle organization;cytoskeleton organization;cell cycle;metabolic process;cell death;biosynthetic process;anatomical structure morphogenesis;cellular process;viral reproduction;cellular component organization;RNA metabolic process;death;multicellular organism…	kinetochore;nucleus;cytoplasm;mitochondrion;centrosome;microtubule organizing center;cytosol;plasma membrane;cilium;membrane;vesicle;macromolecular complex;cell projection;organelle;intracellular organelle;extracellular organelle;intracellular membrane-bounded organelle;intracellular non-membrane-bounded organelle;protein complex;cell part;macromolecular complex;protein complex;cell part;macromol…
RPS3	sp|P23396|RS3_HUMAN	P23396	RS3_HUMAN	Small ribosomal subunit protein uS3	243	1.21749	0.627285	26.6942	26.1156	26.1619	26.0065	25.5213	25.5621	25	23	25	25	23	24	25	23	25	25	23	24	25	23	25	25	23	24	591323330	338113088	383212896	312130368	217212800	262969280		1	0.999	22	145	145	145	nuclear-transcribed mRNA catabolic process, nonsense-mediated decay;nuclear division;nuclear-transcribed mRNA catabolic process;cytoplasmic translation;nucleobase-containing compound metabolic process;DNA metabolic process;DNA repair;regulation of DNA repair;transcription, DNA-dependent;regulation of transcription, DNA-dependent;RNA catabolic process;mRNA catabolic process;translation;translation…	oxidized base lesion DNA N-glycosylase activity;nucleic acid binding;DNA binding;damaged DNA binding;RNA binding;mRNA binding;structural constituent of ribosome;catalytic activity;DNA-(apurinic or apyrimidinic site) lyase activity;structural molecule activity;binding;protein binding;transcription factor binding;oxidized purine base lesion DNA N-glycosylase activity;hydrolase activity;hydrolase ac…	nucleus;nucleolus;cytoplasm;mitochondrial inner membrane;spindle;cytosol;adherens junction;cell-substrate adherens junction;focal adhesion;small ribosomal subunit;membrane;organelle inner membrane;cytosolic small ribosomal subunit;cell junction;cell-substrate junction;ribonucleoprotein complex;organelle membrane;cell projection membrane;leading edge membrane;mitochondrial membrane;vesicle;membran…	nuclear division;cytoplasmic translation;nucleobase-containing compound metabolic process;DNA metabolic process;DNA repair;RNA catabolic process;translation;translational initiation;translational elongation;regulation of translation;protein targeting;nitrogen compound metabolic process;transport;response to stress;response to DNA damage stimulus;organelle organization;mitosis;metabolic process;ce…	nucleus;nucleolus;cytoplasm;cytosol;small ribosomal subunit;membrane;ribonucleoprotein complex;vesicle;macromolecular complex;organelle;intracellular organelle;extracellular organelle;intracellular membrane-bounded organelle;intracellular non-membrane-bounded organelle;cell part;ribosome;ribonucleoprotein complex;macromolecular complex;organelle;intracellular organelle;intracellular non-membrane-…
DSTN	sp|P60981|DEST_HUMAN	P60981	DEST_HUMAN	Destrin	165	1.21447	0.672819	25.1231	24.4342	24.474	24.2707	23.8934	23.8488	16	14	12	8	11	14	16	14	12	8	11	14	19	14	12	9	12	15	89553280	39924160	48158632	37847892	25825614	32691108		1	0.999	14	75	75	81	organelle organization;cytoskeleton organization;actin filament organization;regulation of actin polymerization or depolymerization;actin polymerization or depolymerization;cellular process;positive regulation of organelle organization;cellular component organization;cellular component disassembly;actin filament-based process;actin cytoskeleton organization;actin filament depolymerization;regulat…		cytoskeleton;actin cytoskeleton;cortical cytoskeleton;cortical actin cytoskeleton;vesicle;membrane-bounded vesicle;organelle;membrane-bounded organelle;non-membrane-bounded organelle;intracellular organelle;extracellular organelle;intracellular non-membrane-bounded organelle;extracellular region part;organelle part;intracellular part;cytoskeletal part;cytoplasmic part;intracellular organelle part…	organelle organization;cytoskeleton organization;cellular process;cellular component organization;cellular component disassembly;regulation of organelle organization;protein depolymerization;biological regulation;organelle organization;cytoskeleton organization;cellular process;cellular component organization;cellular component disassembly;regulation of organelle organization;protein depolymeriza…	cytoskeleton;vesicle;organelle;intracellular organelle;extracellular organelle;intracellular non-membrane-bounded organelle;cell part;cytoskeleton;organelle;intracellular organelle;intracellular non-membrane-bounded organelle;cell part
ACO2	sp|Q99798|ACON_HUMAN	Q99798	ACON_HUMAN	Aconitate hydratase, mitochondrial	780	1.2124	0.519258	22.9756	23.2669	22.8459	22.8201	22.3004	22.4101	9	10	5	9	6	6	9	10	5	9	6	6	9	10	5	9	6	6	25952688	40979908	18744708	24895758	14780905	19343746		1	0.999	14	45	45	45	organic acid metabolic process;acetyl-CoA metabolic process;generation of precursor metabolites and energy;tricarboxylic acid cycle;citrate metabolic process;isocitrate metabolic process;coenzyme metabolic process;metabolic process;catabolic process;coenzyme catabolic process;cellular process;carboxylic acid metabolic process;cellular ketone metabolic process;oxoacid metabolic process;cellular me…	catalytic activity;aconitate hydratase activity;binding;iron ion binding;lyase activity;carbon-oxygen lyase activity;hydro-lyase activity;ion binding;cation binding;metal ion binding;transition metal ion binding;iron-sulfur cluster binding;3 iron, 4 sulfur cluster binding;4 iron, 4 sulfur cluster binding;metal cluster binding;catalytic activity;aconitate hydratase activity;binding;lyase activity;…	nucleus;mitochondrion;mitochondrial matrix;membrane-enclosed lumen;organelle;membrane-bounded organelle;intracellular organelle;intracellular membrane-bounded organelle;organelle lumen;organelle part;intracellular part;mitochondrial part;cytoplasmic part;intracellular organelle part;cell part;intracellular organelle lumen;nucleus;mitochondrion;organelle;membrane-bounded organelle;intracellular or…	organic acid metabolic process;generation of precursor metabolites and energy;metabolic process;catabolic process;cellular process;cellular ketone metabolic process;cellular metabolic process;small molecule metabolic process;cofactor metabolic process;metabolic process;catabolic process;cellular process;cellular metabolic process;cofactor metabolic process;metabolic process	nucleus;mitochondrion;organelle;intracellular organelle;intracellular membrane-bounded organelle;cell part;nucleus;mitochondrion;organelle;intracellular organelle;intracellular membrane-bounded organelle;cell part
PSMB6	sp|P28072|PSB6_HUMAN	P28072	PSB6_HUMAN	Proteasome subunit beta type-6	239	1.20582	0.835084	24.6748	23.8269	23.8576	23.5276	22.9576	23.3689	3	2	4	5	3	5	3	2	4	5	3	5	3	2	4	5	3	5	43898684	22704702	28192588	26629528	14000716	20003872		1	0.999	4	22	22	22	G1/S transition of mitotic cell cycle;protein polyubiquitination;mitotic cell cycle;activation of innate immune response;innate immune response activating cell surface receptor signaling pathway;stimulatory C-type lectin receptor signaling pathway;activation of immune response;immune system process;immune response-activating cell surface receptor signaling pathway;antigen processing and presentat…	catalytic activity;endopeptidase activity;threonine-type endopeptidase activity;peptidase activity;hydrolase activity;threonine-type peptidase activity;peptidase activity, acting on L-amino acid peptides;catalytic activity;endopeptidase activity;threonine-type endopeptidase activity;peptidase activity;hydrolase activity;threonine-type peptidase activity;peptidase activity, acting on L-amino acid …	proteasome complex;nucleus;nucleoplasm;cytoplasm;Golgi apparatus;cytosol;proteasome core complex;vesicle;membrane-bounded vesicle;macromolecular complex;organelle;membrane-bounded organelle;intracellular organelle;extracellular organelle;intracellular membrane-bounded organelle;protein complex;extracellular region part;organelle part;intracellular part;nuclear part;cytoplasmic part;intracellular …	mitotic cell cycle;immune system process;protein modification process;proteolysis;nitrogen compound metabolic process;response to stress;response to DNA damage stimulus;cell cycle;signal transduction;metabolic process;cell death;catabolic process;cellular process;viral reproduction;death;protein metabolic process;regulation of protein modification process;cellular nitrogen compound metabolic proc…	proteasome complex;nucleus;nucleoplasm;cytoplasm;Golgi apparatus;cytosol;vesicle;macromolecular complex;organelle;intracellular organelle;extracellular organelle;intracellular membrane-bounded organelle;protein complex;cell part;nucleoplasm;cytoplasm;Golgi apparatus;macromolecular complex;organelle;intracellular organelle;intracellular membrane-bounded organelle;protein complex;cell part;macromol…
CDK1	sp|P06493|CDK1_HUMAN	P06493	CDK1_HUMAN	Cyclin-dependent kinase 1	297	1.19315	0.645903	23.8588	23.4356	NaN	23.2223	22.7918	22.9898	6	6	4	5	4	6	5	5	3	4	3	4	6	6	4	5	4	6	39486212	22173502	8870687	26776342	15209263	32691036		1	0.999	10	31	24	31	cell cycle checkpoint;DNA damage checkpoint;G1/S transition of mitotic cell cycle;regulation of transcription involved in G1/S phase of mitotic cell cycle;G2/M transition of mitotic cell cycle;MAPKKK cascade;activation of MAPKK activity;activation of MAPK activity;microtubule cytoskeleton organization;mitotic cell cycle;nuclear division;response to reactive oxygen species;karyogamy;regulation of …	nucleotide binding;catalytic activity;protein kinase activity;protein serine/threonine kinase activity;cyclin-dependent protein kinase activity;binding;ATP binding;RNA polymerase II carboxy-terminal domain kinase activity;kinase activity;transferase activity;transferase activity, transferring phosphorus-containing groups;phosphotransferase activity, alcohol group as acceptor;purine nucleotide bin…	nucleus;nucleoplasm;cytoplasm;mitochondrion;centrosome;microtubule organizing center;spindle;cytosol;microtubule;spindle microtubule;membrane;midbody;vesicle;membrane-bounded vesicle;macromolecular complex;organelle;membrane-bounded organelle;non-membrane-bounded organelle;intracellular organelle;extracellular organelle;intracellular membrane-bounded organelle;intracellular non-membrane-bounded o…	mitotic cell cycle;nuclear division;immune system process;nucleobase-containing compound metabolic process;DNA metabolic process;DNA replication;DNA repair;DNA packaging;protein complex assembly;protein modification process;protein phosphorylation;proteolysis;phosphorus metabolic process;nitrogen compound metabolic process;cellular component movement;response to stress;response to DNA damage stim…	nucleus;nucleoplasm;cytoplasm;mitochondrion;centrosome;microtubule organizing center;cytosol;membrane;midbody;vesicle;macromolecular complex;organelle;intracellular organelle;extracellular organelle;intracellular membrane-bounded organelle;intracellular non-membrane-bounded organelle;protein complex;cell part
EIF6	sp|P56537|IF6_HUMAN	P56537	IF6_HUMAN	Eukaryotic translation initiation factor 6	245	1.18895	0.559621	23.3385	22.9119	22.6381	22.4665	22.2326	22.5104	6	3	4	4	5	7	6	3	4	4	5	7	6	3	4	4	5	7	39503768	5865223	12578115	5.35495e+06	11342052	14411513		1	0.999	5	29	29	29	ribosomal subunit export from nucleus;transport;nucleocytoplasmic transport;cellular process;cellular component organization;cellular component assembly;ribonucleoprotein complex biogenesis;ribonucleoprotein complex assembly;establishment of ribosome localization;cellular macromolecular complex subunit organization;cellular macromolecular complex assembly;ribosome assembly;mature ribosome assembl…	nucleic acid binding;RNA binding;translation initiation factor activity;binding;translation factor activity, nucleic acid binding;ribonucleoprotein binding;ribosome binding;ribosomal large subunit binding;binding;ribonucleoprotein binding;ribosome binding;binding;ribonucleoprotein binding;ribosome binding;binding;ribonucleoprotein binding;ribosome binding;binding;ribonucleoprotein binding;ribosom…	nucleus;lamin filament;nucleoplasm;nucleolus;cytoplasm;intermediate filament;vesicle;membrane-bounded vesicle;macromolecular complex;organelle;membrane-bounded organelle;non-membrane-bounded organelle;intracellular organelle;extracellular organelle;intracellular membrane-bounded organelle;intracellular non-membrane-bounded organelle;protein complex;extracellular region part;organelle part;intrace…	ribosomal subunit export from nucleus;transport;nucleocytoplasmic transport;cellular process;cellular component organization;cellular component assembly;ribonucleoprotein complex assembly;cellular macromolecular complex assembly;ribosome assembly;ribosomal large subunit biogenesis;nuclear transport;localization;establishment of localization;cellular localization;macromolecular complex assembly;or…	nucleus;nucleoplasm;nucleolus;cytoplasm;vesicle;macromolecular complex;organelle;intracellular organelle;extracellular organelle;intracellular membrane-bounded organelle;intracellular non-membrane-bounded organelle;protein complex;cell part
PRDX5	sp|P30044|PRDX5_HUMAN	P30044	PRDX5_HUMAN	Peroxiredoxin-5, mitochondrial	214	1.18784	1.21354	24.8319	23.3224	23.9419	23.2101	22.5876	22.6579	14	7	12	11	9	10	14	7	12	11	9	10	14	7	12	11	9	10	175679200	35787332	73784592	46338380	27567828	35940352		1	0.999	10	63	63	63	response to reactive oxygen species;nucleobase-containing compound metabolic process;transcription initiation, DNA-dependent;regulation of transcription, DNA-dependent;regulation of transcription from RNA polymerase III promoter;transcription initiation from RNA polymerase II promoter;coenzyme metabolic process;oxidoreduction coenzyme metabolic process;NADP metabolic process;nucleoside phosphate …	regulatory region DNA binding;RNA polymerase III regulatory region DNA binding;regulatory region nucleic acid binding;nucleic acid binding;DNA binding;catalytic activity;peroxidase activity;enzyme inhibitor activity;endopeptidase inhibitor activity;cysteine-type endopeptidase inhibitor activity;receptor binding;binding;protein binding;antioxidant activity;oxidoreductase activity;oxidoreductase ac…	extracellular space;nucleus;cytoplasm;mitochondrion;mitochondrial matrix;peroxisome;peroxisomal matrix;cytosol;cytoplasmic vesicle;microbody lumen;membrane-enclosed lumen;vesicle;membrane-bounded vesicle;microbody;organelle;membrane-bounded organelle;intracellular organelle;extracellular organelle;intracellular membrane-bounded organelle;organelle lumen;extracellular region part;organelle part;in…	nucleobase-containing compound metabolic process;transcription initiation, DNA-dependent;nitrogen compound metabolic process;response to stress;response to oxidative stress;metabolic process;catabolic process;biosynthetic process;nucleotide metabolic process;cellular process;RNA metabolic process;cellular nitrogen compound metabolic process;response to chemical stimulus;macromolecule metabolic pr…	extracellular space;nucleus;cytoplasm;mitochondrion;peroxisome;cytosol;vesicle;microbody;organelle;intracellular organelle;extracellular organelle;intracellular membrane-bounded organelle;cell part
EMD	sp|P50402|EMD_HUMAN	P50402	EMD_HUMAN	Emerin	254	1.18435	3.28303	26.9564	NaN	23.9156	22.348	21.8149	22.2959	21	5	13	6	5	6	21	5	13	6	5	6	21	5	13	6	5	6	733533060	1.44301e+06	72231576	13458180	13207732	12312387		1	0.999	17	56	56	56	mitotic cell cycle;system process;muscle system process;muscle contraction;nuclear envelope organization;cell cycle;mitotic nuclear envelope disassembly;mitotic nuclear envelope reassembly;muscle organ development;negative regulation of cell proliferation;regulation of signal transduction;cellular process;response to organic substance;cellular component organization;cellular membrane organization…	actin binding;binding;protein binding;cytoskeletal protein binding;tubulin binding;beta-tubulin binding	nuclear envelope;nuclear inner membrane;nuclear outer membrane;endoplasmic reticulum;microtubule;membrane;integral to membrane;organelle inner membrane;outer membrane;organelle membrane;intrinsic to membrane;nuclear membrane;organelle envelope;organelle outer membrane;envelope;macromolecular complex;organelle;membrane-bounded organelle;intracellular organelle;intracellular membrane-bounded organe…	mitotic cell cycle;muscle contraction;cell cycle;cellular process;cellular component organization;cellular membrane organization;cellular component disassembly;cell differentiation;multicellular organismal process;developmental process;response to chemical stimulus;anatomical structure development;response to stimulus;regulation of transport;membrane organization;biological regulation	nuclear envelope;endoplasmic reticulum;membrane;macromolecular complex;organelle;intracellular organelle;intracellular membrane-bounded organelle;protein complex;cell part;endoplasmic reticulum;membrane;organelle;intracellular organelle;intracellular membrane-bounded organelle;cell part
PFN1	sp|P07737|PROF1_HUMAN	P07737	PROF1_HUMAN	Profilin-1	140	1.18411	0.535536	28.3487	27.9698	27.8263	27.7836	27.2891	27.4656	32	26	28	33	30	34	32	26	28	33	30	34	32	26	28	33	30	34	1107311620	533372320	519744736	691772030	464160576	595677060		1	0.999	15	183	183	183	cell activation;neural tube closure;platelet degranulation;regulation of nucleotide metabolic process;regulation of transcription, DNA-dependent;regulation of transcription from RNA polymerase II promoter;transport;exocytosis;organelle organization;cytoskeleton organization;blood coagulation;hemostasis;regulation of actin polymerization or depolymerization;regulation of biosynthetic process;posit…	nucleotide binding;adenyl-nucleotide exchange factor activity;actin binding;actin monomer binding;binding;protein binding;phospholipid binding;phosphatidylinositol-4,5-bisphosphate binding;cytoskeletal protein binding;lipid binding;purine nucleotide binding;enzyme regulator activity;adenyl nucleotide binding;phosphatidylinositol binding;nucleoside-triphosphatase regulator activity;ATPase regulato…	nucleus;cytoplasm;cytosol;cytoskeleton;adherens junction;cell-substrate adherens junction;focal adhesion;cell cortex;membrane;cell junction;cell-substrate junction;vesicle;membrane-bounded vesicle;cell projection;neuron projection;organelle;membrane-bounded organelle;non-membrane-bounded organelle;intracellular organelle;extracellular organelle;intracellular membrane-bounded organelle;intracellul…	cell activation;transport;exocytosis;organelle organization;cytoskeleton organization;cellular process;cellular component organization;vesicle-mediated transport;multicellular organismal process;developmental process;regulation of organelle organization;response to chemical stimulus;secretion;anatomical structure formation involved in morphogenesis;coagulation;regulation of body fluid levels;resp…	nucleus;cytoplasm;cytosol;cytoskeleton;cell cortex;membrane;vesicle;cell projection;neuron projection;organelle;intracellular organelle;extracellular organelle;intracellular membrane-bounded organelle;intracellular non-membrane-bounded organelle;cell part;synapse
HSPH1	sp|Q92598|HS105_HUMAN	Q92598	HS105_HUMAN	Heat shock protein 105 kDa	858	1.17882	0.595355	23.7164	23.1093	23.1535	23.0008	22.6024	22.59	14	14	11	13	15	14	14	13	10	12	13	12	16	16	12	15	16	15	59864052	39379864	43574276	44635936	30809630	36588840		1	0.999	22	81	74	90	regulation of immune system process;positive regulation of immune system process;regulation of leukocyte activation;positive regulation of leukocyte activation;protein folding;'de novo' protein folding;transport;endocytosis;receptor-mediated endocytosis;response to stress;response to unfolded protein;metabolic process;response to temperature stimulus;response to heat;response to abiotic stimulus;…	nucleotide binding;binding;ATP binding;purine nucleotide binding;adenyl nucleotide binding;ribonucleotide binding;purine ribonucleotide binding;adenyl ribonucleotide binding;purine ribonucleoside triphosphate binding;nucleotide binding;binding;ATP binding;purine nucleotide binding;adenyl nucleotide binding;ribonucleotide binding;purine ribonucleotide binding;adenyl ribonucleotide binding;purine r…	extracellular region;nucleoplasm;cytoplasm;cytosol;microtubule;membrane-enclosed lumen;vesicle;vesicle lumen;membrane-bounded vesicle;macromolecular complex;organelle;membrane-bounded organelle;extracellular organelle;organelle lumen;protein complex;extracellular region part;organelle part;intracellular part;nuclear part;cytoskeletal part;cytoplasmic vesicle part;cytoplasmic part;intracellular or…	protein folding;transport;endocytosis;response to stress;metabolic process;response to heat;response to abiotic stimulus;cellular process;membrane invagination;cellular component organization;cellular membrane organization;vesicle-mediated transport;protein metabolic process;response to chemical stimulus;macromolecule metabolic process;cellular metabolic process;primary metabolic process;response…	extracellular region;nucleoplasm;cytoplasm;cytosol;vesicle;macromolecular complex;organelle;extracellular organelle;protein complex;cell part;macromolecular complex;protein complex;cell part
RPL10A	sp|P62906|RL10A_HUMAN	P62906	RL10A_HUMAN	Large ribosomal subunit protein uL1	217	1.17872	0.557244	25.5658	25.7198	25.3096	25.273	24.6292	25.0214	15	13	14	12	13	14	15	13	14	12	13	14	15	13	14	12	13	14	219038560	185756768	167415952	160928000	100091200	144819104		1	0.999	10	81	81	81	nuclear-transcribed mRNA catabolic process, nonsense-mediated decay;nuclear-transcribed mRNA catabolic process;nucleobase-containing compound metabolic process;RNA catabolic process;mRNA catabolic process;translation;translational initiation;translational elongation;translational termination;protein targeting;protein targeting to membrane;cotranslational protein targeting to membrane;SRP-dependen…	structural constituent of ribosome;structural molecule activity;nucleic acid binding;RNA binding;structural constituent of ribosome;structural molecule activity;binding;nucleic acid binding;RNA binding;binding	nucleus;nucleolus;cytoplasm;mitochondrion;cytosol;adherens junction;cell-substrate adherens junction;focal adhesion;large ribosomal subunit;membrane;cytosolic large ribosomal subunit;cell junction;cell-substrate junction;ribonucleoprotein complex;vesicle;membrane-bounded vesicle;macromolecular complex;organelle;membrane-bounded organelle;non-membrane-bounded organelle;intracellular organelle;extr…	nucleobase-containing compound metabolic process;RNA catabolic process;translation;translational initiation;translational elongation;protein targeting;nitrogen compound metabolic process;transport;metabolic process;catabolic process;biosynthetic process;anatomical structure morphogenesis;cellular process;protein transport;viral reproduction;cellular component organization;RNA metabolic process;mR…	nucleus;nucleolus;cytoplasm;mitochondrion;cytosol;membrane;ribonucleoprotein complex;vesicle;macromolecular complex;organelle;intracellular organelle;extracellular organelle;intracellular membrane-bounded organelle;intracellular non-membrane-bounded organelle;cell part;ribonucleoprotein complex;macromolecular complex;cell part;ribosome;ribonucleoprotein complex;macromolecular complex;organelle;in…
APEH	sp|P13798|ACPH_HUMAN	P13798	ACPH_HUMAN	Acylamino-acid-releasing enzyme	732	1.17711	0.450975	22.642	22.1243	22.2078	21.9721	21.7113	21.9378	9	9	6	7	4	6	9	9	6	7	4	6	9	9	6	7	4	6	25220710	18813626	18024660	16128255	4.34888e+06	13502984		1	0.999	11	41	41	41	proteolysis;metabolic process;glycoprotein metabolic process;cellular process;protein metabolic process;macromolecule metabolic process;cellular metabolic process;primary metabolic process;cellular macromolecule metabolic process;beta-amyloid metabolic process	catalytic activity;endopeptidase activity;serine-type endopeptidase activity;peptidase activity;serine-type peptidase activity;exopeptidase activity;omega peptidase activity;hydrolase activity;serine hydrolase activity;peptidase activity, acting on L-amino acid peptides;catalytic activity;endopeptidase activity;serine-type endopeptidase activity;peptidase activity;serine-type peptidase activity;h…	cytoplasm;membrane;organelle membrane;nuclear membrane;vesicle;membrane-bounded vesicle;organelle;membrane-bounded organelle;extracellular organelle;extracellular region part;organelle part;intracellular part;nuclear part;intracellular organelle part;cell part;extracellular membrane-bounded organelle;extracellular vesicular exosome;cytoplasm;membrane;organelle membrane;nuclear membrane;organelle …	proteolysis;metabolic process;cellular process;protein metabolic process;macromolecule metabolic process;cellular metabolic process;primary metabolic process	cytoplasm;membrane;vesicle;organelle;extracellular organelle;cell part;cytoplasm;membrane;cell part;cytoplasm;membrane;cell part
TRIM28	sp|Q13263|TIF1B_HUMAN	Q13263	TIF1B_HUMAN	Transcription intermediary factor 1-beta	835	1.17572	0.476475	23.2164	22.7034	22.6676	22.4574	22.2462	22.4544	13	8	11	11	7	10	13	8	11	11	7	10	13	8	11	11	7	10	56120504	26698728	26025198	19383142	15314651	25422394		1	0.999	14	60	60	60	negative regulation of transcription from RNA polymerase II promoter;cell morphogenesis;cell morphogenesis involved in differentiation;epithelial to mesenchymal transition;morphogenesis of an epithelium;immune system process;nucleobase-containing compound metabolic process;DNA metabolic process;DNA repair;regulation of DNA repair;DNA modification;DNA alkylation;DNA methylation;transcription initi…	protein binding transcription factor activity;transcription factor binding transcription factor activity;nucleic acid binding transcription factor activity;nucleic acid binding;DNA binding;sequence-specific DNA binding transcription factor activity;transcription cofactor activity;transcription coactivator activity;transcription corepressor activity;catalytic activity;protein kinase activity;ubiqu…	chromatin;nuclear chromatin;euchromatin;heterochromatin;nucleus;nucleoplasm;nuclear euchromatin;nuclear heterochromatin;organelle;membrane-bounded organelle;intracellular organelle;intracellular membrane-bounded organelle;organelle part;intracellular part;chromosomal part;nuclear part;intracellular organelle part;nuclear chromosome part;cell part;intracellular;cell part;intracellular;cell part;in…	cell morphogenesis;immune system process;nucleobase-containing compound metabolic process;DNA metabolic process;DNA repair;DNA modification;transcription initiation, DNA-dependent;protein complex assembly;protein modification process;protein phosphorylation;one-carbon metabolic process;phosphorus metabolic process;nitrogen compound metabolic process;response to stress;response to DNA damage stimu…	nucleus;nucleoplasm;organelle;intracellular organelle;intracellular membrane-bounded organelle;cell part;intracellular;cell part;intracellular;cell part;intracellular;cell part;nucleoplasm;cell part
EEF1G	sp|P26641|EF1G_HUMAN	P26641	EF1G_HUMAN	Elongation factor 1-gamma	437	1.17558	0.503613	26.7862	26.6076	26.3822	26.352	25.7875	26.1257	34	31	29	29	27	26	34	31	29	29	27	26	34	31	29	29	27	26	809510140	587570620	491658880	541340480	279199744	428830976		1	0.999	27	176	176	176	translation;translational elongation;metabolic process;biosynthetic process;macromolecule biosynthetic process;response to biotic stimulus;response to virus;cellular process;gene expression;protein metabolic process;cellular macromolecule biosynthetic process;macromolecule metabolic process;cellular metabolic process;primary metabolic process;cellular biosynthetic process;cellular macromolecule m…	nucleic acid binding;RNA binding;translation elongation factor activity;binding;translation factor activity, nucleic acid binding;nucleic acid binding;RNA binding;translation elongation factor activity;binding;translation factor activity, nucleic acid binding	nucleus;cytoplasm;cytosol;membrane;vesicle;membrane-bounded vesicle;organelle;membrane-bounded organelle;intracellular organelle;extracellular organelle;intracellular membrane-bounded organelle;extracellular region part;intracellular part;cytoplasmic part;cell part;extracellular membrane-bounded organelle;extracellular vesicular exosome	translation;translational elongation;metabolic process;biosynthetic process;response to biotic stimulus;cellular process;protein metabolic process;macromolecule metabolic process;cellular metabolic process;primary metabolic process;response to stimulus;multi-organism process	nucleus;cytoplasm;cytosol;membrane;vesicle;organelle;intracellular organelle;extracellular organelle;intracellular membrane-bounded organelle;cell part
NSUN2	sp|Q08J23|NSUN2_HUMAN	Q08J23	NSUN2_HUMAN	RNA cytosine C(5)-methyltransferase NSUN2	767	1.17472	0.420404	23.3897	23.1214	23.0527	22.9841	22.5249	22.7935	19	17	16	18	9	17	19	17	16	18	9	17	19	17	16	18	9	17	68784608	45320360	70627136	31322096	19106326	34050156		1	0.999	23	96	96	96	nuclear division;RNA methylation;nucleobase-containing compound metabolic process;RNA processing;tRNA metabolic process;tRNA modification;one-carbon metabolic process;nitrogen compound metabolic process;organelle organization;mitosis;tRNA processing;metabolic process;RNA modification;cellular process;cellular component organization;RNA metabolic process;cell cycle process;cell cycle phase;tRNA me…	tRNA binding;nucleic acid binding;RNA binding;catalytic activity;binding;methyltransferase activity;RNA methyltransferase activity;tRNA methyltransferase activity;S-adenosylmethionine-dependent methyltransferase activity;tRNA (cytosine) methyltransferase activity;tRNA (cytosine-5-)-methyltransferase activity;transferase activity;transferase activity, transferring one-carbon groups	nucleus;nucleolus;cytoplasm;spindle;organelle;membrane-bounded organelle;non-membrane-bounded organelle;intracellular organelle;intracellular membrane-bounded organelle;intracellular non-membrane-bounded organelle;organelle part;intracellular part;nuclear part;cytoskeletal part;intracellular organelle part;cell part	nuclear division;nucleobase-containing compound metabolic process;RNA processing;tRNA metabolic process;one-carbon metabolic process;nitrogen compound metabolic process;organelle organization;mitosis;tRNA processing;metabolic process;RNA modification;cellular process;cellular component organization;RNA metabolic process;cellular nitrogen compound metabolic process;macromolecule metabolic process;…	nucleus;nucleolus;cytoplasm;organelle;intracellular organelle;intracellular membrane-bounded organelle;intracellular non-membrane-bounded organelle;cell part
ADSS2	sp|P30520|PURA2_HUMAN	P30520	PURA2_HUMAN	Adenylosuccinate synthetase isozyme 2	456	1.17301	0.687243	22.6582	22.1459	22.1351	21.9748	21.2346	21.668	5	2	3	4	3	4	5	2	3	4	3	4	5	2	3	4	3	4	14005953	5.73698e+06	5534445	8905857	3.78067e+06	8127415		1	0.999	4	21	21	21
CMBL	sp|Q96DG6|CMBL_HUMAN	Q96DG6	CMBL_HUMAN	Carboxymethylenebutenolidase homolog	245	1.16985	0.671882	23.2272	22.7144	22.4825	22.397	21.8556	22.1558	8	7	6	7	4	5	8	7	6	7	4	5	8	7	6	7	4	5	29882922	19465726	21990542	18567524	12022202	15680648		1	0.999	10	37	37	37		catalytic activity;hydrolase activity	cytosol;vesicle;membrane-bounded vesicle;organelle;membrane-bounded organelle;extracellular organelle;extracellular region part;intracellular part;cytoplasmic part;cell part;extracellular membrane-bounded organelle;extracellular vesicular exosome		cytosol;vesicle;organelle;extracellular organelle;cell part
SKP1	sp|P63208|SKP1_HUMAN	P63208	SKP1_HUMAN	S-phase kinase-associated protein 1	163	1.16514	1.11015	24.2276	22.9178	23.0387	22.5478	21.9907	22.315	7	5	4	4	2	4	7	5	4	4	2	4	7	5	4	4	2	4	47164312	16931880	18287104	14447189	4.02182e+06	6.30812e+06		1	0.999	6	26	26	26	G1/S transition of mitotic cell cycle;G2/M transition of mitotic cell cycle;mitotic cell cycle;activation of innate immune response;innate immune response activating cell surface receptor signaling pathway;stimulatory C-type lectin receptor signaling pathway;activation of immune response;immune system process;immune response-activating cell surface receptor signaling pathway;regulation of immune …	catalytic activity;ubiquitin-protein ligase activity;ligase activity;ligase activity, forming carbon-nitrogen bonds;acid-amino acid ligase activity;small conjugating protein ligase activity	ubiquitin ligase complex;nucleoplasm;cytosol;SCF ubiquitin ligase complex;cullin-RING ubiquitin ligase complex;Cul7-RING ubiquitin ligase complex;vesicle;membrane-bounded vesicle;macromolecular complex;organelle;membrane-bounded organelle;extracellular organelle;protein complex;extracellular region part;organelle part;intracellular part;nuclear part;cytoplasmic part;intracellular organelle part;c…	mitotic cell cycle;immune system process;chromatin organization;protein modification process;proteolysis;response to stress;organelle organization;cell cycle;signal transduction;metabolic process;catabolic process;cellular process;viral reproduction;cellular component organization;chromatin modification;histone modification;protein metabolic process;regulation of protein modification process;macr…	ubiquitin ligase complex;nucleoplasm;cytosol;vesicle;macromolecular complex;organelle;extracellular organelle;protein complex;cell part
CCT8	sp|P50990|TCPQ_HUMAN	P50990	TCPQ_HUMAN	T-complex protein 1 subunit theta	548	1.16062	0.479302	25.32	25.1177	24.9792	24.9383	24.3606	24.68	29	29	28	29	22	27	29	29	28	29	22	27	29	29	28	29	22	27	300969376	253280944	244333904	237085616	154762896	193734512		1	0.999	28	164	164	164	protein folding;'de novo' protein folding;binding of sperm to zona pellucida;cell recognition;metabolic process;cellular process;cell-cell recognition;cellular component organization;protein metabolic process;reproductive process;cellular component assembly;sperm-egg recognition;macromolecule metabolic process;cellular metabolic process;primary metabolic process;cellular macromolecule metabolic p…	nucleotide binding;catalytic activity;binding;ATP binding;pyrophosphatase activity;hydrolase activity;hydrolase activity, acting on acid anhydrides;hydrolase activity, acting on acid anhydrides, in phosphorus-containing anhydrides;ATPase activity;purine nucleotide binding;nucleoside-triphosphatase activity;adenyl nucleotide binding;ribonucleotide binding;purine ribonucleotide binding;adenyl ribon…	cytoplasm;centrosome;microtubule organizing center;cytosol;chaperonin-containing T-complex;cytoskeleton;microtubule;inclusion body;aggresome;vesicle;membrane-bounded vesicle;macromolecular complex;organelle;membrane-bounded organelle;non-membrane-bounded organelle;intracellular organelle;extracellular organelle;intracellular non-membrane-bounded organelle;protein complex;cell body;extracellular r…	protein folding;cell recognition;metabolic process;cellular process;cellular component organization;protein metabolic process;cellular component assembly;macromolecule metabolic process;cellular metabolic process;primary metabolic process;protein folding;metabolic process;cellular process;protein metabolic process;macromolecule metabolic process;cellular metabolic process;primary metabolic proces…	cytoplasm;centrosome;microtubule organizing center;cytosol;cytoskeleton;vesicle;macromolecular complex;organelle;intracellular organelle;extracellular organelle;intracellular non-membrane-bounded organelle;protein complex;cell body;cell part;cytoplasm;cell part
CKB	sp|P12277|KCRB_HUMAN	P12277	KCRB_HUMAN	Creatine kinase B-type	381	1.1582	0.681803	24.3769	23.6496	23.8145	23.5868	23.0212	23.1876	16	11	14	14	10	11	16	11	14	14	10	11	16	11	14	14	10	11	119315248	51256180	65973664	59675928	37731892	47672880		1	0.999	12	76	76	76	organic acid metabolic process;cellular amino acid metabolic process;cellular modified amino acid metabolic process;phosphagen metabolic process;creatine metabolic process;nitrogen compound metabolic process;cellular ion homeostasis;metabolic process;amine metabolic process;cellular process;cellular homeostasis;carboxylic acid metabolic process;substantia nigra development;cellular anion homeosta…	nucleotide binding;catalytic activity;creatine kinase activity;binding;protein binding;ATP binding;kinase activity;transferase activity;transferase activity, transferring phosphorus-containing groups;phosphotransferase activity, nitrogenous group as acceptor;purine nucleotide binding;enzyme binding;adenyl nucleotide binding;ubiquitin protein ligase binding;ribonucleotide binding;purine ribonucleo…	mitochondrion;cytosol;vesicle;membrane-bounded vesicle;organelle;membrane-bounded organelle;intracellular organelle;extracellular organelle;intracellular membrane-bounded organelle;extracellular region part;intracellular part;cytoplasmic part;cell part;extracellular membrane-bounded organelle;extracellular vesicular exosome	organic acid metabolic process;cellular amino acid metabolic process;nitrogen compound metabolic process;cellular ion homeostasis;metabolic process;amine metabolic process;cellular process;cellular homeostasis;developmental process;cellular nitrogen compound metabolic process;cellular ketone metabolic process;homeostatic process;cellular metabolic process;primary metabolic process;small molecule …	mitochondrion;cytosol;vesicle;organelle;intracellular organelle;extracellular organelle;intracellular membrane-bounded organelle;cell part
TRMT112	sp|Q9UI30|TR112_HUMAN	Q9UI30	TR112_HUMAN	Multifunctional methyltransferase subunit TRM112-like protein	125	1.15743	1.153	22.4303	21.5667	21.4343	NaN	20.7967	20.5182	3	3	5	1	2	3	3	3	5	1	2	3	3	3	5	1	2	3	7.9031e+06	4780534	10881235	2.18354e+06	2670566	2109295		1	0.999	4	17	17	17	protein modification process;protein methylation;one-carbon metabolic process;metabolic process;protein alkylation;cellular process;peptidyl-glutamine methylation;protein metabolic process;methylation;macromolecule metabolic process;macromolecule modification;macromolecule methylation;cellular metabolic process;primary metabolic process;cellular macromolecule metabolic process;cellular protein me…	catalytic activity;methyltransferase activity;protein methyltransferase activity;transferase activity;transferase activity, transferring one-carbon groups	vesicle;membrane-bounded vesicle;macromolecular complex;organelle;membrane-bounded organelle;extracellular organelle;protein complex;extracellular region part;extracellular membrane-bounded organelle;extracellular vesicular exosome	protein modification process;one-carbon metabolic process;metabolic process;protein alkylation;cellular process;protein metabolic process;macromolecule metabolic process;macromolecule modification;cellular metabolic process;primary metabolic process;small molecule metabolic process	vesicle;macromolecular complex;organelle;extracellular organelle;protein complex
GPS1	sp|Q13098|CSN1_HUMAN	Q13098	CSN1_HUMAN	COP9 signalosome complex subunit 1	491	1.15355	0.453119	21.4929	21.5991	21.4177	21.3389	20.7282	21.0832	4	4	4	4	3	3	4	4	4	4	3	3	4	4	4	4	3	3	7.15038e+06	11771634	8442144	6.45226e+06	4494258	3.43274e+06		1	0.999	7	22	22	22	MAPKKK cascade;inactivation of MAPK activity;protein deneddylation;regulation of protein phosphorylation;regulation of nucleotide metabolic process;protein modification process;negative regulation of protein kinase activity;response to stress;cell cycle;signal transduction;intracellular protein kinase cascade;JNK cascade;metabolic process;regulation of catabolic process;regulation of signal trans…	enzyme inhibitor activity;GTPase inhibitor activity;enzyme regulator activity;GTPase regulator activity;nucleoside-triphosphatase regulator activity	nucleus;cytoplasm;signalosome;macromolecular complex;organelle;membrane-bounded organelle;intracellular organelle;intracellular membrane-bounded organelle;protein complex;organelle part;intracellular part;nuclear part;intracellular organelle part;cell part;nucleus;cytoplasm;organelle;membrane-bounded organelle;intracellular organelle;intracellular membrane-bounded organelle;intracellular part;cel…	protein modification process;response to stress;cell cycle;signal transduction;metabolic process;cellular process;protein metabolic process;regulation of protein modification process;macromolecule metabolic process;macromolecule modification;cellular metabolic process;primary metabolic process;response to stimulus;biological regulation;protein modification by small protein conjugation or removal	nucleus;cytoplasm;macromolecular complex;organelle;intracellular organelle;intracellular membrane-bounded organelle;protein complex;cell part;nucleus;cytoplasm;organelle;intracellular organelle;intracellular membrane-bounded organelle;cell part;nucleus;cytoplasm;organelle;intracellular organelle;intracellular membrane-bounded organelle;cell part
PPIB	sp|P23284|PPIB_HUMAN	P23284	PPIB_HUMAN	Peptidyl-prolyl cis-trans isomerase B	216	1.15076	0.896493	26.4575	25.5102	25.4619	25.218	24.6273	24.8948	22	21	23	20	21	21	22	21	23	20	21	21	22	21	23	20	21	21	666186430	276195680	339164544	266968064	186612432	235946816		1	0.999	16	128	128	128	protein peptidyl-prolyl isomerization;protein folding;protein modification process;metabolic process;cellular process;regulation of gene expression;posttranscriptional regulation of gene expression;cellular component organization;peptidyl-amino acid modification;peptidyl-proline modification;regulation of metabolic process;protein metabolic process;extracellular matrix organization;regulation of …	peptidyl-prolyl cis-trans isomerase activity;catalytic activity;binding;protein binding;isomerase activity;cis-trans isomerase activity;enzyme binding;protein complex binding;peptide binding;unfolded protein binding;RNA polymerase binding	nucleus;endoplasmic reticulum;endoplasmic reticulum lumen;smooth endoplasmic reticulum;adherens junction;cell-substrate adherens junction;focal adhesion;membrane;cytoplasmic membrane-bounded vesicle;cell junction;cell-substrate junction;cytoplasmic vesicle;membrane-enclosed lumen;vesicle;membrane-bounded vesicle;macromolecular complex;melanosome;organelle;membrane-bounded organelle;intracellular …	protein folding;protein modification process;metabolic process;cellular process;cellular component organization;peptidyl-amino acid modification;protein metabolic process;extracellular matrix organization;regulation of protein stability;developmental process;extracellular structure organization;macromolecule metabolic process;macromolecule modification;cellular metabolic process;primary metabolic…	nucleus;endoplasmic reticulum;membrane;cytoplasmic membrane-bounded vesicle;vesicle;macromolecular complex;organelle;intracellular organelle;extracellular organelle;intracellular membrane-bounded organelle;cell part
CCAR2	sp|Q8N163|CCAR2_HUMAN	Q8N163	CCAR2_HUMAN	Cell cycle and apoptosis regulator protein 2	923	1.14626	0.609167	21.1635	21.7138	21.1755	21.0854	20.5757	20.5642	5	10	5	2	5	3	5	10	5	2	5	3	5	10	5	2	5	3	8920947	20459372	6029001	2.44711e+06	3161691	3.58675e+06		1	0.999	11	30	30	30	mitochondrial fission;nucleobase-containing compound metabolic process;regulation of transcription, DNA-dependent;RNA processing;mRNA processing;nitrogen compound metabolic process;response to stress;response to DNA damage stimulus;organelle organization;mitochondrion organization;cell cycle;metabolic process;RNA splicing;apoptotic mitochondrial changes;response to temperature stimulus;response t…	RNA polymerase II core binding;basal transcription machinery binding;basal RNA polymerase II transcription machinery binding;enzyme inhibitor activity;binding;protein binding;enzyme binding;enzyme regulator activity;RNA polymerase core enzyme binding;RNA polymerase binding	chromatin;nuclear chromatin;nucleus;nucleoplasm;cytoplasm;mitochondrial matrix;membrane-enclosed lumen;organelle;membrane-bounded organelle;intracellular organelle;intracellular membrane-bounded organelle;organelle lumen;organelle part;intracellular part;chromosomal part;nuclear part;mitochondrial part;cytoplasmic part;intracellular organelle part;nuclear chromosome part;cell part;intracellular o…	nucleobase-containing compound metabolic process;RNA processing;mRNA processing;nitrogen compound metabolic process;response to stress;response to DNA damage stimulus;organelle organization;mitochondrion organization;cell cycle;metabolic process;RNA splicing;response to heat;response to abiotic stimulus;cellular process;cellular component organization;RNA metabolic process;mRNA metabolic process;…	nucleus;nucleoplasm;cytoplasm;organelle;intracellular organelle;intracellular membrane-bounded organelle;cell part
SYNCRIP	sp|O60506|HNRPQ_HUMAN	O60506	HNRPQ_HUMAN	Heterogeneous nuclear ribonucleoprotein Q	623	1.14472	0.473454	24.3539	23.9836	24.147	23.808	23.3668	23.8894	6	6	5	9	6	6	6	6	5	9	6	6	9	10	9	13	8	10	36873080	32440444	37897472	39496520	26575788	44104572		1	0.999	14	38	38	59	RNA splicing, via transesterification reactions;RNA splicing, via transesterification reactions with bulged adenosine as nucleophile;nuclear mRNA splicing, via spliceosome;osteoblast differentiation;nucleobase-containing compound metabolic process;RNA processing;mRNA processing;regulation of translation;nitrogen compound metabolic process;metabolic process;RNA splicing;regulation of biosynthetic …	nucleotide binding;nucleic acid binding;RNA binding;single-stranded RNA binding;mRNA binding;binding;poly(A) RNA binding;poly-purine tract binding;nucleotide binding;nucleic acid binding;binding;nucleotide binding;nucleic acid binding;binding	nucleus;nucleoplasm;spliceosomal complex;endoplasmic reticulum;membrane;ribonucleoprotein complex;macromolecular complex;organelle;membrane-bounded organelle;intracellular organelle;intracellular membrane-bounded organelle;protein complex;organelle part;intracellular part;nuclear part;cytoplasmic part;intracellular organelle part;cell part;CRD-mediated mRNA stability complex;catalytic step 2 spli…	nucleobase-containing compound metabolic process;RNA processing;mRNA processing;regulation of translation;nitrogen compound metabolic process;metabolic process;RNA splicing;cellular process;viral reproduction;RNA metabolic process;mRNA metabolic process;cell differentiation;developmental process;cellular nitrogen compound metabolic process;response to chemical stimulus;macromolecule metabolic pro…	nucleus;nucleoplasm;spliceosomal complex;endoplasmic reticulum;membrane;ribonucleoprotein complex;macromolecular complex;organelle;intracellular organelle;intracellular membrane-bounded organelle;protein complex;cell part;ribonucleoprotein complex;macromolecular complex;cell part
EIF5	sp|P55010|IF5_HUMAN	P55010	IF5_HUMAN	Eukaryotic translation initiation factor 5	431	1.13983	0.50019	23.3142	22.8077	22.6772	22.5698	22.3427	22.3859	6	4	5	5	3	5	6	4	5	5	3	5	6	4	5	5	3	5	31684218	19017834	17584072	18403464	5759346	10981982		1	0.999	5	28	28	28	translation;translational initiation;regulation of translation;regulation of translational initiation;metabolic process;biosynthetic process;macromolecule biosynthetic process;regulation of biosynthetic process;cellular process;gene expression;regulation of gene expression;regulation of macromolecule biosynthetic process;posttranscriptional regulation of gene expression;regulation of metabolic pr…	nucleotide binding;nucleic acid binding;RNA binding;translation initiation factor activity;catalytic activity;GTPase activity;binding;GTP binding;translation factor activity, nucleic acid binding;pyrophosphatase activity;hydrolase activity;hydrolase activity, acting on acid anhydrides;hydrolase activity, acting on acid anhydrides, in phosphorus-containing anhydrides;purine nucleotide binding;nucl…	cytoplasm;cytosol;plasma membrane;membrane;intracellular part;cytoplasmic part;cell part;cytoplasm;plasma membrane;membrane;intracellular part;cell part;cytoplasm;plasma membrane;membrane;intracellular part;cell part	translation;translational initiation;regulation of translation;metabolic process;biosynthetic process;cellular process;protein metabolic process;macromolecule metabolic process;cellular metabolic process;primary metabolic process;biological regulation	cytoplasm;cytosol;plasma membrane;membrane;cell part;cytoplasm;plasma membrane;membrane;cell part;cytoplasm;plasma membrane;membrane;cell part
CALR	sp|P27797|CALR_HUMAN	P27797	CALR_HUMAN	Calreticulin	417	1.13647	1.03501	24.9928	23.7221	23.7889	23.2691	22.9067	23.223	20	15	16	11	11	10	20	15	16	11	11	10	20	15	16	11	11	10	206250624	71427432	91129424	44154948	37035552	46137716		1	0.999	14	83	83	83	negative regulation of transcription from RNA polymerase II promoter;immune system process;antigen processing and presentation of peptide antigen via MHC class I;antigen processing and presentation of exogenous peptide antigen;antigen processing and presentation of exogenous peptide antigen via MHC class I, TAP-dependent;peptide antigen assembly with MHC protein complex;peptide antigen assembly w…	opsonin binding;complement binding;complement component C1q binding;glycoprotein binding;nucleic acid binding;DNA binding;RNA binding;mRNA binding;receptor binding;integrin binding;binding;iron ion binding;calcium ion binding;protein binding;zinc ion binding;enzyme binding;carbohydrate binding;ubiquitin protein ligase binding;protein complex binding;nuclear hormone receptor binding;steroid hormon…	acrosomal vesicle;extracellular region;proteinaceous extracellular matrix;extracellular space;intracellular;nucleus;cytoplasm;endoplasmic reticulum;endoplasmic reticulum lumen;smooth endoplasmic reticulum;Golgi apparatus;cytosol;polysome;adherens junction;cell-substrate adherens junction;focal adhesion;external side of plasma membrane;cell surface;membrane;integral to membrane;cytoplasmic membran…	immune system process;carbohydrate metabolic process;regulation of translation;protein folding;protein complex assembly;protein modification process;protein glycosylation;protein targeting;transport;cellular ion homeostasis;endocytosis;nucleocytoplasmic transport;response to stress;organelle organization;cytoskeleton organization;signal transduction;aging;metabolic process;response to endogenous …	extracellular region;proteinaceous extracellular matrix;extracellular space;intracellular;nucleus;cytoplasm;endoplasmic reticulum;Golgi apparatus;cytosol;polysome;cell surface;membrane;cytoplasmic membrane-bounded vesicle;ribonucleoprotein complex;extracellular matrix;vesicle;macromolecular complex;MHC class I peptide loading complex;organelle;intracellular organelle;extracellular organelle;intra…
RHOA	sp|P61586|RHOA_HUMAN	P61586	RHOA_HUMAN	Transforming protein RhoA	193	1.13567	0.71994	24.2799	23.4846	23.5546	23.3583	22.8468	22.9542	13	10	7	7	10	7	6	5	3	3	3	4	13	10	7	7	10	7	105182152	29177128	38849156	32894532	38405128	24619450		1	0.999	10	54	24	54	microtubule cytoskeleton organization;ossification;cell activation;cellular component movement;chemotaxis;organelle organization;cytoskeleton organization;microtubule-based process;cell-cell junction assembly;spindle organization;mitotic spindle organization;signal transduction;cell surface receptor linked signaling pathway;enzyme linked receptor protein signaling pathway;transmembrane receptor p…	nucleotide binding;catalytic activity;GTPase activity;binding;protein binding;GTP binding;cytoskeletal protein binding;pyrophosphatase activity;hydrolase activity;hydrolase activity, acting on acid anhydrides;hydrolase activity, acting on acid anhydrides, in phosphorus-containing anhydrides;myosin binding;purine nucleotide binding;nucleoside-triphosphatase activity;guanyl nucleotide binding;ribon…	endosome;endoplasmic reticulum membrane;cytosol;cytoskeleton;plasma membrane;cell-cell junction;adherens junction;cell-substrate adherens junction;focal adhesion;cell cortex;membrane;lamellipodium;cell junction;cell-substrate junction;midbody;organelle membrane;vesicle;membrane-bounded vesicle;cleavage furrow;cell division site part;cell projection;organelle;membrane-bounded organelle;non-membran…	cell activation;cellular component movement;organelle organization;cytoskeleton organization;signal transduction;metabolic process;response to external stimulus;anatomical structure morphogenesis;cellular process;viral reproduction;cellular component organization;cellular component assembly;multicellular organismal process;developmental process;regulation of organelle organization;cell junction o…	endosome;cytosol;cytoskeleton;plasma membrane;cell cortex;membrane;midbody;vesicle;cell projection;organelle;intracellular organelle;extracellular organelle;intracellular membrane-bounded organelle;intracellular non-membrane-bounded organelle;cell part;intracellular;membrane;cell part;intracellular;cell part;intracellular;membrane;cell part;intracellular;membrane;cell part
GLS	sp|O94925|GLSK_HUMAN	O94925	GLSK_HUMAN	Glutaminase kidney isoform, mitochondrial	669	1.13519	0.732037	24.2394	23.9009	23.5119	23.5826	23.0025	22.871	12	8	9	8	8	7	12	8	9	8	8	7	12	8	9	8	8	7	48643520	38894748	31591796	34887836	19607450	29506608		1	0.999	10	52	52	52	regulation of neurotransmitter levels;suckling behavior;regulation of respiratory gaseous exchange by neurological system process;system process;organic acid metabolic process;nucleobase-containing compound metabolic process;transcription initiation, DNA-dependent;transcription initiation from RNA polymerase II promoter;protein complex assembly;cellular amino acid metabolic process;glutamate meta…	catalytic activity;glutaminase activity;hydrolase activity;hydrolase activity, acting on carbon-nitrogen (but not peptide) bonds;hydrolase activity, acting on carbon-nitrogen (but not peptide) bonds, in linear amides;catalytic activity;glutaminase activity;hydrolase activity;hydrolase activity, acting on carbon-nitrogen (but not peptide) bonds;hydrolase activity, acting on carbon-nitrogen (but no…	mitochondrion;mitochondrial matrix;cytosol;membrane-enclosed lumen;organelle;membrane-bounded organelle;intracellular organelle;intracellular membrane-bounded organelle;organelle lumen;organelle part;intracellular part;mitochondrial part;cytoplasmic part;intracellular organelle part;cell part;intracellular organelle lumen	organic acid metabolic process;nucleobase-containing compound metabolic process;transcription initiation, DNA-dependent;protein complex assembly;cellular amino acid metabolic process;nitrogen compound metabolic process;transport;neurotransmitter transport;cell communication;cell-cell signaling;behavior;metabolic process;catabolic process;biosynthetic process;amine metabolic process;cellular proce…	mitochondrion;cytosol;organelle;intracellular organelle;intracellular membrane-bounded organelle;cell part
EIF3E	sp|P60228|EIF3E_HUMAN	P60228	EIF3E_HUMAN	Eukaryotic translation initiation factor 3 subunit E	445	1.13453	0.344043	22.8787	23.0502	22.8273	22.7936	22.3582	22.5723	12	12	8	11	9	6	12	12	8	11	9	6	12	12	8	11	9	6	42309844	38008880	22859872	28751576	18728144	22436332		1	0.999	14	58	58	58	nuclear-transcribed mRNA catabolic process, nonsense-mediated decay;nuclear-transcribed mRNA catabolic process;formation of translation preinitiation complex;nucleobase-containing compound metabolic process;RNA catabolic process;mRNA catabolic process;translation;translational initiation;regulation of translation;regulation of translational initiation;nitrogen compound metabolic process;metabolic…	nucleic acid binding;RNA binding;translation initiation factor activity;binding;protein binding;translation factor activity, nucleic acid binding;protein N-terminus binding;nucleic acid binding;RNA binding;translation initiation factor activity;binding;translation factor activity, nucleic acid binding;nucleic acid binding;RNA binding;translation initiation factor activity;binding;translation fact…	nucleus;nucleoplasm;cytoplasm;cytosol;eukaryotic translation initiation factor 3 complex;membrane;eukaryotic 43S preinitiation complex;nuclear body;PML body;ribonucleoprotein complex;vesicle;membrane-bounded vesicle;macromolecular complex;eukaryotic 48S preinitiation complex;organelle;membrane-bounded organelle;intracellular organelle;extracellular organelle;intracellular membrane-bounded organel…	nucleobase-containing compound metabolic process;RNA catabolic process;translation;translational initiation;regulation of translation;nitrogen compound metabolic process;metabolic process;catabolic process;biosynthetic process;cellular process;cellular component organization;RNA metabolic process;mRNA metabolic process;protein metabolic process;cellular component assembly;ribonucleoprotein comple…	nucleus;nucleoplasm;cytoplasm;cytosol;membrane;ribonucleoprotein complex;vesicle;macromolecular complex;organelle;intracellular organelle;extracellular organelle;intracellular membrane-bounded organelle;protein complex;cell part;macromolecular complex;protein complex;cell part;nucleus;cytoplasm;ribonucleoprotein complex;macromolecular complex;organelle;intracellular organelle;intracellular membra…
PPIA	sp|P62937|PPIA_HUMAN	P62937	PPIA_HUMAN	Peptidyl-prolyl cis-trans isomerase A	165	1.13166	0.625589	28.171	27.5664	27.4345	27.3124	26.8722	27.1104	38	32	33	31	34	35	32	27	29	27	31	31	38	32	33	31	34	35	1541154180	1193719300	961707070	817152380	589577730	726720000		1	0.999	13	203	177	203	protein peptidyl-prolyl isomerization;cell activation;immune system process;platelet degranulation;nucleobase-containing compound metabolic process;DNA metabolic process;DNA replication;RNA-dependent DNA replication;protein folding;protein modification process;nitrogen compound metabolic process;transport;exocytosis;cellular component movement;organelle organization;blood coagulation;hemostasis;m…	peptidyl-prolyl cis-trans isomerase activity;catalytic activity;binding;protein binding;isomerase activity;cis-trans isomerase activity;peptide binding;virion binding;unfolded protein binding;peptidyl-prolyl cis-trans isomerase activity;catalytic activity;isomerase activity;cis-trans isomerase activity;peptidyl-prolyl cis-trans isomerase activity;catalytic activity;isomerase activity;cis-trans is…	extracellular region;extracellular space;nucleus;cytosol;adherens junction;cell-substrate adherens junction;focal adhesion;membrane;cell junction;cell-substrate junction;vesicle;membrane-bounded vesicle;organelle;membrane-bounded organelle;intracellular organelle;extracellular organelle;intracellular membrane-bounded organelle;extracellular region part;intracellular part;cytoplasmic part;cell par…	cell activation;immune system process;nucleobase-containing compound metabolic process;DNA metabolic process;DNA replication;protein folding;protein modification process;nitrogen compound metabolic process;transport;exocytosis;cellular component movement;organelle organization;metabolic process;biosynthetic process;cellular process;viral reproduction;cellular component organization;vesicle-mediat…	extracellular region;extracellular space;nucleus;cytosol;membrane;vesicle;organelle;intracellular organelle;extracellular organelle;intracellular membrane-bounded organelle;cell part
STRAP	sp|Q9Y3F4|STRAP_HUMAN	Q9Y3F4	STRAP_HUMAN	Serine-threonine kinase receptor-associated protein	350	1.1313	0.622571	23.97	23.4731	23.3027	23.1846	22.6401	23.0533	11	12	11	8	11	8	11	12	11	8	11	8	11	12	11	8	11	8	69756456	57348284	42362816	40131912	33861812	38545200		1	0.999	15	61	61	61	negative regulation of transcription from RNA polymerase II promoter;spliceosomal snRNP assembly;tissue homeostasis;regulation of protein phosphorylation;negative regulation of protein phosphorylation;system process;regulation of transcription, DNA-dependent;regulation of transcription from RNA polymerase II promoter;signal transduction;cell surface receptor linked signaling pathway;enzyme linked…		nucleus;nucleoplasm;cytoplasm;cytosol;plasma membrane;membrane;SMN complex;macromolecular complex;SMN-Sm protein complex;organelle;membrane-bounded organelle;intracellular organelle;intracellular membrane-bounded organelle;protein complex;organelle part;intracellular part;nuclear part;cytoplasmic part;intracellular organelle part;cell part	signal transduction;cellular process;cellular component organization;cellular component assembly;ribonucleoprotein complex assembly;regulation of protein modification process;multicellular organismal process;cellular macromolecular complex assembly;homeostatic process;response to stimulus;macromolecular complex assembly;biological regulation	nucleus;nucleoplasm;cytoplasm;cytosol;plasma membrane;membrane;macromolecular complex;organelle;intracellular organelle;intracellular membrane-bounded organelle;protein complex;cell part
RPS12	sp|P25398|RS12_HUMAN	P25398	RS12_HUMAN	Small ribosomal subunit protein eS12	132	1.12659	0.616231	24.6842	24.0149	24.0002	23.8292	23.4009	23.6204	15	14	10	12	10	9	15	14	10	12	10	9	15	14	10	12	10	9	158795264	106462688	87353104	78329416	52150424	50344004		1	0.999	7	70	70	70	nuclear-transcribed mRNA catabolic process, nonsense-mediated decay;nuclear-transcribed mRNA catabolic process;nucleobase-containing compound metabolic process;RNA catabolic process;mRNA catabolic process;translation;translational initiation;translational elongation;translational termination;protein targeting;protein targeting to membrane;cotranslational protein targeting to membrane;SRP-dependen…	structural constituent of ribosome;structural molecule activity	cytosol;small ribosomal subunit;membrane;cytosolic small ribosomal subunit;ribonucleoprotein complex;macromolecular complex;organelle part;intracellular part;cytoplasmic part;intracellular organelle part;cell part	nucleobase-containing compound metabolic process;RNA catabolic process;translation;translational initiation;translational elongation;protein targeting;nitrogen compound metabolic process;transport;metabolic process;catabolic process;biosynthetic process;cellular process;protein transport;viral reproduction;cellular component organization;RNA metabolic process;mRNA metabolic process;protein metabo…	cytosol;small ribosomal subunit;membrane;ribonucleoprotein complex;macromolecular complex;cell part
DYNC1I2	sp|Q13409|DC1I2_HUMAN	Q13409	DC1I2_HUMAN	Cytoplasmic dynein 1 intermediate chain 2	638	1.1243	0.582187	22.0303	21.6881	NaN	21.5327	21.0673	21.2311	4	4	2	4	3	4	4	4	2	4	3	4	4	4	2	4	3	4	9678802	7472911	2.96673e+06	8633573	4738384	4.74447e+06		1	0.999	5	21	21	21	G2/M transition of mitotic cell cycle;mitotic cell cycle;immune system process;antigen processing and presentation of exogenous peptide antigen;antigen processing and presentation of peptide antigen via MHC class II;antigen processing and presentation of peptide or polysaccharide antigen via MHC class II;transport;cellular component movement;organelle organization;microtubule-based process;microt…	motor activity;microtubule motor activity;catalytic activity;pyrophosphatase activity;hydrolase activity;hydrolase activity, acting on acid anhydrides;hydrolase activity, acting on acid anhydrides, in phosphorus-containing anhydrides;nucleoside-triphosphatase activity	cytoplasm;centrosome;microtubule organizing center;cytosol;cytoplasmic dynein complex;microtubule;microtubule associated complex;dynein complex;vesicle;macromolecular complex;organelle;non-membrane-bounded organelle;intracellular organelle;intracellular non-membrane-bounded organelle;protein complex;organelle part;intracellular part;cytoskeletal part;cytoplasmic part;intracellular organelle part;…	mitotic cell cycle;immune system process;transport;cellular component movement;organelle organization;cell cycle;metabolic process;cellular process;viral reproduction;cellular component organization;establishment of localization;cellular component movement;cellular process;cellular component movement;cellular process;cellular component movement;cellular process;cellular component movement;cellula…	cytoplasm;centrosome;microtubule organizing center;cytosol;vesicle;macromolecular complex;organelle;intracellular organelle;intracellular non-membrane-bounded organelle;protein complex;cell part;macromolecular complex;protein complex;cell part;macromolecular complex;protein complex;cell part;macromolecular complex;protein complex;cell part;macromolecular complex;protein complex;cell part;macromol…
AARS1	sp|P49588|SYAC_HUMAN	P49588	SYAC_HUMAN	Alanine--tRNA ligase, cytoplasmic	968	1.11755	0.565334	22.5641	22.1453	22.053	22.0229	21.4127	21.6308	11	9	9	11	9	4	11	9	9	11	9	4	11	9	9	11	9	4	23609342	16600519	15894848	19396826	10559931	8291154		1	0.999	15	53	53	53
EIF5A	sp|P63241|IF5A1_HUMAN	P63241	IF5A1_HUMAN	Eukaryotic translation initiation factor 5A-1	154	1.11707	0.704395	27.1069	26.37	26.3559	26.1966	25.6344	25.8887	28	35	32	29	30	32	8	16	11	11	13	10	28	35	32	29	30	32	577975040	385590240	317005472	311158720	212832336	259809584		1	0.999	19	186	69	186	organic acid metabolic process;RNA export from nucleus;mRNA export from nucleus;regulation of translation;regulation of translational elongation;regulation of translational termination;translational frameshifting;protein modification process;cellular amino acid metabolic process;cellular modified amino acid metabolic process;protein targeting;protein export from nucleus;nitrogen compound metaboli…	nucleic acid binding;RNA binding;translation elongation factor activity;binding;protein binding;translation factor activity, nucleic acid binding;snRNA binding;U6 snRNA binding;ribonucleoprotein binding;ribosome binding;protein N-terminus binding;nucleic acid binding;RNA binding;translation elongation factor activity;binding;translation factor activity, nucleic acid binding;ribonucleoprotein bind…	nucleus;annulate lamellae;nuclear pore;cytoplasm;endoplasmic reticulum membrane;cytosol;membrane;organelle membrane;vesicle;membrane-bounded vesicle;macromolecular complex;organelle;membrane-bounded organelle;intracellular organelle;extracellular organelle;intracellular membrane-bounded organelle;protein complex;extracellular region part;organelle part;intracellular part;membrane part;nuclear par…	organic acid metabolic process;regulation of translation;protein modification process;cellular amino acid metabolic process;protein targeting;nitrogen compound metabolic process;transport;nucleocytoplasmic transport;metabolic process;cell death;biosynthetic process;amine metabolic process;cellular process;protein transport;nucleobase-containing compound transport;death;peptidyl-amino acid modific…	nucleus;nuclear pore;cytoplasm;cytosol;membrane;vesicle;macromolecular complex;organelle;intracellular organelle;extracellular organelle;intracellular membrane-bounded organelle;protein complex;cell part
PDXK	sp|O00764|PDXK_HUMAN	O00764	PDXK_HUMAN	Pyridoxal kinase	312	1.11684	0.565852	22.5626	22.0106	21.9992	21.8792	21.3633	21.6323	8	4	4	3	4	2	8	4	4	3	4	2	8	4	4	3	4	2	19584200	10215236	12245274	5883990	5753901	4124425		1	0.999	7	25	25	25	coenzyme metabolic process;vitamin metabolic process;water-soluble vitamin metabolic process;metabolic process;cell proliferation;biosynthetic process;coenzyme biosynthetic process;vitamin biosynthetic process;pyridoxal 5'-phosphate salvage;cellular process;water-soluble vitamin biosynthetic process;vitamin B6 metabolic process;vitamin B6 biosynthetic process;pyridoxal phosphate metabolic process…	nucleotide binding;magnesium ion binding;catalytic activity;binding;protein binding;ATP binding;zinc ion binding;pyridoxal kinase activity;kinase activity;transferase activity;transferase activity, transferring phosphorus-containing groups;phosphotransferase activity, alcohol group as acceptor;purine nucleotide binding;vitamin binding;pyridoxal phosphate binding;adenyl nucleotide binding;potassiu…	nucleus;nucleoplasm;cytoplasm;cytosol;vesicle;membrane-bounded vesicle;organelle;membrane-bounded organelle;intracellular organelle;extracellular organelle;intracellular membrane-bounded organelle;extracellular region part;organelle part;intracellular part;nuclear part;cytoplasmic part;intracellular organelle part;cell part;extracellular membrane-bounded organelle;extracellular vesicular exosome;…	vitamin metabolic process;metabolic process;cell proliferation;biosynthetic process;cellular process;cellular metabolic compound salvage;cellular metabolic process;small molecule metabolic process;heterocycle metabolic process;cofactor metabolic process;vitamin metabolic process;metabolic process;biosynthetic process;cellular process;cellular metabolic compound salvage;cellular metabolic process;…	nucleus;nucleoplasm;cytoplasm;cytosol;vesicle;organelle;intracellular organelle;extracellular organelle;intracellular membrane-bounded organelle;cell part;nucleoplasm;cytoplasm;cell part
ENO3	sp|P13929|ENOB_HUMAN	P13929	ENOB_HUMAN	Beta-enolase	434	1.11436	0.463442	22.471	21.9093	22.2574	21.949	21.5828	21.7155	8	5	5	4	3	3	8	5	5	4	3	3	20	16	15	13	13	12	14589772	6.19062e+06	7.68142e+06	7.32267e+06	7.41592e+06	6458256		1	0.999	12	28	28	89	carbohydrate metabolic process;monosaccharide metabolic process;glucose metabolic process;alcohol metabolic process;gluconeogenesis;aging;metabolic process;biosynthetic process;anatomical structure morphogenesis;tissue development;cellular process;carbohydrate biosynthetic process;hexose metabolic process;hexose biosynthetic process;regeneration;developmental process;cellular carbohydrate biosynt…	magnesium ion binding;catalytic activity;phosphopyruvate hydratase activity;binding;lyase activity;carbon-oxygen lyase activity;hydro-lyase activity;ion binding;cation binding;metal ion binding;magnesium ion binding;catalytic activity;phosphopyruvate hydratase activity;binding;lyase activity;carbon-oxygen lyase activity;hydro-lyase activity;ion binding;cation binding;metal ion binding;magnesium i…	phosphopyruvate hydratase complex;extracellular space;cytoplasm;cytosol;plasma membrane;membrane;vesicle;membrane-bounded vesicle;macromolecular complex;organelle;membrane-bounded organelle;extracellular organelle;protein complex;extracellular region part;intracellular part;cytoplasmic part;cytosolic part;cell part;extracellular membrane-bounded organelle;extracellular vesicular exosome;phosphopy…	carbohydrate metabolic process;alcohol metabolic process;aging;metabolic process;biosynthetic process;anatomical structure morphogenesis;cellular process;developmental process;growth;response to chemical stimulus;response to drug;cellular metabolic process;primary metabolic process;small molecule metabolic process;anatomical structure development;response to stimulus;carbohydrate metabolic proces…	extracellular space;cytoplasm;cytosol;plasma membrane;membrane;vesicle;macromolecular complex;organelle;extracellular organelle;protein complex;cell part;macromolecular complex;protein complex;cell part;macromolecular complex;protein complex;cell part;macromolecular complex;protein complex;cell part;macromolecular complex;protein complex;cell part;macromolecular complex;protein complex;cell part;…
FUBP1	sp|Q96AE4|FUBP1_HUMAN	Q96AE4	FUBP1_HUMAN	Far upstream element-binding protein 1	644	1.11255	0.921759	24.1358	23.1036	22.8961	22.5776	22.3371	22.4555	17	11	7	5	8	8	14	9	6	4	7	8	17	11	7	5	8	8	136187296	51432284	33985644	19516228	22711870	26172708		1	0.999	17	56	48	56	nucleobase-containing compound metabolic process;transcription, DNA-dependent;transcription from RNA polymerase II promoter;nitrogen compound metabolic process;metabolic process;biosynthetic process;macromolecule biosynthetic process;positive regulation of metabolic process;cellular process;regulation of gene expression;positive regulation of macromolecule metabolic process;positive regulation of…	nucleic acid binding transcription factor activity;nucleic acid binding;DNA binding;single-stranded DNA binding;sequence-specific DNA binding transcription factor activity;binding;structure-specific DNA binding;nucleic acid binding;RNA binding;binding;nucleic acid binding;RNA binding;binding;nucleic acid binding;RNA binding;binding	nucleus;nucleoplasm;organelle;membrane-bounded organelle;intracellular organelle;intracellular membrane-bounded organelle;organelle part;intracellular part;nuclear part;intracellular organelle part;cell part;nucleoplasm;organelle part;intracellular part;nuclear part;intracellular organelle part;cell part;nucleoplasm;organelle part;intracellular part;nuclear part;intracellular organelle part;cell …	nucleobase-containing compound metabolic process;transcription from RNA polymerase II promoter;nitrogen compound metabolic process;metabolic process;biosynthetic process;cellular process;RNA metabolic process;cellular nitrogen compound metabolic process;macromolecule metabolic process;cellular metabolic process;primary metabolic process;biological regulation	nucleus;nucleoplasm;organelle;intracellular organelle;intracellular membrane-bounded organelle;cell part;nucleoplasm;cell part;nucleoplasm;cell part
MTAP	sp|Q13126|MTAP_HUMAN	Q13126	MTAP_HUMAN	S-methyl-5'-thioadenosine phosphorylase	283	1.11233	0.693981	22.7545	22.2171	22.1986	22.0621	21.2721	21.754	8	8	7	4	5	7	8	8	7	4	5	7	8	8	7	4	5	7	27242042	14948908	15008559	8125714	6042196	11807694		1	0.999	9	39	39	39	sulfur amino acid metabolic process;sulfur amino acid biosynthetic process;organic acid metabolic process;nucleobase-containing compound metabolic process;purine ribonucleoside salvage;cellular amino acid metabolic process;methionine metabolic process;cellular biogenic amine metabolic process;polyamine metabolic process;sulfur compound metabolic process;nitrogen compound metabolic process;metabol…	catalytic activity;phosphorylase activity;purine-nucleoside phosphorylase activity;transferase activity;transferase activity, transferring glycosyl groups;transferase activity, transferring hexosyl groups;transferase activity, transferring pentosyl groups;S-methyl-5-thioadenosine phosphorylase activity;catalytic activity;phosphorylase activity;transferase activity;transferase activity, transferri…	nucleus;cytoplasm;cytosol;vesicle;membrane-bounded vesicle;organelle;membrane-bounded organelle;intracellular organelle;extracellular organelle;intracellular membrane-bounded organelle;extracellular region part;intracellular part;cytoplasmic part;cell part;extracellular membrane-bounded organelle;extracellular vesicular exosome;nucleus;cytoplasm;organelle;membrane-bounded organelle;intracellular …	organic acid metabolic process;nucleobase-containing compound metabolic process;cellular amino acid metabolic process;sulfur compound metabolic process;nitrogen compound metabolic process;metabolic process;biosynthetic process;nucleoside metabolic process;amine metabolic process;cellular process;cellular nitrogen compound metabolic process;cellular ketone metabolic process;cellular metabolic comp…	nucleus;cytoplasm;cytosol;vesicle;organelle;intracellular organelle;extracellular organelle;intracellular membrane-bounded organelle;cell part;nucleus;cytoplasm;organelle;intracellular organelle;intracellular membrane-bounded organelle;cell part;nucleus;cytoplasm;organelle;intracellular organelle;intracellular membrane-bounded organelle;cell part;nucleus;cytoplasm;organelle;intracellular organell…
DEK	sp|P35659|DEK_HUMAN	P35659	DEK_HUMAN	Protein DEK	375	1.10997	0.319211	22.0965	21.8364	22.0694	21.7582	NaN	21.605	5	4	4	2	2	3	5	4	4	2	2	3	5	4	4	2	2	3	8802807	7357761	12107460	5880944	1.61134e+06	6307119		1	0.9989	6	20	20	20	nucleobase-containing compound metabolic process;regulation of DNA repair;chromatin organization;transcription, DNA-dependent;regulation of transcription, DNA-dependent;regulation of transcription from RNA polymerase II promoter;transcription from RNA polymerase II promoter;nitrogen compound metabolic process;organelle organization;signal transduction;metabolic process;biosynthetic process;macrom…	nucleic acid binding;DNA binding;binding;protein binding;histone binding;nucleic acid binding;DNA binding;binding;nucleic acid binding;DNA binding;binding	nucleus;organelle;membrane-bounded organelle;non-membrane-bounded organelle;intracellular organelle;intracellular membrane-bounded organelle;intracellular non-membrane-bounded organelle;contractile fiber;intracellular part;cytoplasmic part;cell part	nucleobase-containing compound metabolic process;chromatin organization;transcription from RNA polymerase II promoter;nitrogen compound metabolic process;organelle organization;signal transduction;metabolic process;biosynthetic process;cellular process;cellular component organization;RNA metabolic process;chromatin modification;cellular nitrogen compound metabolic process;macromolecule metabolic …	nucleus;organelle;intracellular organelle;intracellular membrane-bounded organelle;intracellular non-membrane-bounded organelle;cell part
TUBA4A	sp|P68366|TBA4A_HUMAN	P68366	TBA4A_HUMAN	Tubulin alpha-4A chain	448	1.10872	0.626556	29.2096	28.8314	28.6645	28.6907	28.001	28.1341	61	57	57	63	51	44	7	6	4	6	5	6	61	57	57	63	51	44	2550289660	2051784450	1772053890	1908760700	1195542910	1383463940		1	0.999	26	333	34	333	G2/M transition of mitotic cell cycle;mitotic cell cycle;cell activation;platelet degranulation;protein folding;'de novo' protein folding;protein complex assembly;transport;exocytosis;organelle organization;microtubule-based process;cell cycle;blood coagulation;hemostasis;metabolic process;cellular process;cellular component organization;vesicle-mediated transport;protein metabolic process;cell c…	nucleotide binding;catalytic activity;GTPase activity;structural molecule activity;structural constituent of cytoskeleton;binding;GTP binding;pyrophosphatase activity;hydrolase activity;hydrolase activity, acting on acid anhydrides;hydrolase activity, acting on acid anhydrides, in phosphorus-containing anhydrides;purine nucleotide binding;nucleoside-triphosphatase activity;guanyl nucleotide bindi…	extracellular region;cytosol;microtubule;vesicle;membrane-bounded vesicle;macromolecular complex;organelle;membrane-bounded organelle;extracellular organelle;protein complex;extracellular region part;organelle part;intracellular part;cytoskeletal part;cytoplasmic part;intracellular organelle part;cell part;extracellular membrane-bounded organelle;extracellular vesicular exosome;microtubule;macrom…	mitotic cell cycle;cell activation;protein folding;protein complex assembly;transport;exocytosis;organelle organization;cell cycle;metabolic process;cellular process;cellular component organization;vesicle-mediated transport;protein metabolic process;cellular component assembly;multicellular organismal process;cellular macromolecular complex assembly;macromolecule metabolic process;cellular metab…	extracellular region;cytosol;vesicle;macromolecular complex;organelle;extracellular organelle;protein complex;cell part;macromolecular complex;protein complex;cell part;macromolecular complex;protein complex;cell part;macromolecular complex;protein complex;cell part;macromolecular complex;protein complex;cell part;macromolecular complex;protein complex;cell part
FUBP3	sp|Q96I24|FUBP3_HUMAN	Q96I24	FUBP3_HUMAN	Far upstream element-binding protein 3	572	1.10841	0.633279	23.1354	22.7191	22.4551	22.4995	21.9444	21.9658	5	3	2	3	4	3	5	3	2	3	4	3	7	4	2	3	4	3	19085134	15712485	9791537	14160538	9455966	10015482		1	0.999	10	20	20	23	nucleobase-containing compound metabolic process;transcription, DNA-dependent;regulation of transcription, DNA-dependent;regulation of transcription from RNA polymerase II promoter;nitrogen compound metabolic process;metabolic process;biosynthetic process;macromolecule biosynthetic process;regulation of biosynthetic process;positive regulation of biosynthetic process;positive regulation of metabo…	regulatory region DNA binding;transcription regulatory region sequence-specific DNA binding;RNA polymerase II regulatory region sequence-specific DNA binding;RNA polymerase II core promoter proximal region sequence-specific DNA binding;sequence-specific DNA binding RNA polymerase II transcription factor activity;RNA polymerase II core promoter proximal region sequence-specific DNA binding transcr…	nucleus;cytoplasm;membrane;organelle;membrane-bounded organelle;intracellular organelle;intracellular membrane-bounded organelle;intracellular part;cell part	nucleobase-containing compound metabolic process;nitrogen compound metabolic process;metabolic process;biosynthetic process;cellular process;RNA metabolic process;cellular nitrogen compound metabolic process;macromolecule metabolic process;cellular metabolic process;primary metabolic process;biological regulation	nucleus;cytoplasm;membrane;organelle;intracellular organelle;intracellular membrane-bounded organelle;cell part
LDHA	sp|P00338|LDHA_HUMAN	P00338	LDHA_HUMAN	L-lactate dehydrogenase A chain	332	1.10674	0.466366	27.781	27.5367	27.4388	27.4521	26.8925	27.0129	45	43	41	49	29	32	40	38	38	46	25	29	45	43	41	49	29	32	1463975300	1035886980	1121617150	1341068420	831363200	1055095040		1	0.999	26	239	216	239	carbohydrate metabolic process;monosaccharide metabolic process;glucose metabolic process;glucose catabolic process;alcohol metabolic process;organic acid metabolic process;pyruvate metabolic process;generation of precursor metabolites and energy;glycolysis;cell communication;metabolic process;catabolic process;response to external stimulus;cellular process;response to extracellular stimulus;carb…	catalytic activity;lactate dehydrogenase activity;L-lactate dehydrogenase activity;oxidoreductase activity;oxidoreductase activity, acting on CH-OH group of donors;oxidoreductase activity, acting on the CH-OH group of donors, NAD or NADP as acceptor;catalytic activity;oxidoreductase activity;oxidoreductase activity, acting on CH-OH group of donors;oxidoreductase activity, acting on the CH-OH grou…	nucleus;mitochondrion;cytosol;membrane;vesicle;membrane-bounded vesicle;flagellar fibrous sheath;organelle;membrane-bounded organelle;intracellular organelle;extracellular organelle;intracellular membrane-bounded organelle;extracellular region part;organelle part;intracellular part;microtubule-based flagellum part;cytoplasmic part;intracellular organelle part;flagellum part;cell projection part;c…	carbohydrate metabolic process;alcohol metabolic process;organic acid metabolic process;generation of precursor metabolites and energy;cell communication;metabolic process;catabolic process;response to external stimulus;cellular process;response to extracellular stimulus;developmental process;cellular ketone metabolic process;cellular metabolic process;primary metabolic process;small molecule met…	nucleus;mitochondrion;cytosol;membrane;vesicle;organelle;intracellular organelle;extracellular organelle;intracellular membrane-bounded organelle;cell part
NME2	sp|P22392|NDKB_HUMAN	P22392	NDKB_HUMAN	Nucleoside diphosphate kinase B	152	1.10624	0.711129	25.2147	24.4605	24.6121	24.4055	23.7298	24.0185	13	9	9	10	8	9	2	1	1	1	1	1	25	23	22	22	17	18	193257168	109096832	104881896	90477968	55273152	60798676		1	0.999	11	58	7	127	nucleobase-containing compound metabolic process;purine nucleotide metabolic process;purine nucleotide biosynthetic process;GTP biosynthetic process;pyrimidine nucleoside metabolic process;pyrimidine nucleotide metabolic process;pyrimidine nucleotide biosynthetic process;UTP biosynthetic process;CTP biosynthetic process;transcription, DNA-dependent;regulation of transcription, DNA-dependent;regul…	nucleotide binding;nucleic acid binding transcription factor activity;nucleic acid binding;DNA binding;sequence-specific DNA binding transcription factor activity;catalytic activity;nucleoside diphosphate kinase activity;protein kinase activity;protein histidine kinase activity;binding;ATP binding;kinase activity;transferase activity;transferase activity, transferring phosphorus-containing groups…	ruffle;nucleus;cytoplasm;mitochondrion;cytosol;lamellipodium;vesicle;membrane-bounded vesicle;cell projection;organelle;membrane-bounded organelle;intracellular organelle;extracellular organelle;intracellular membrane-bounded organelle;extracellular region part;intracellular part;cytoplasmic part;cell part;extracellular membrane-bounded organelle;extracellular vesicular exosome;cell periphery	nucleobase-containing compound metabolic process;nitrogen compound metabolic process;cell adhesion;signal transduction;metabolic process;biosynthetic process;nucleoside metabolic process;nucleotide metabolic process;cellular process;nucleobase-containing small molecule interconversion;RNA metabolic process;biological adhesion;cellular nitrogen compound metabolic process;macromolecule metabolic pr…	nucleus;cytoplasm;mitochondrion;cytosol;vesicle;cell projection;organelle;intracellular organelle;extracellular organelle;intracellular membrane-bounded organelle;cell part
SRP14	sp|P37108|SRP14_HUMAN	P37108	SRP14_HUMAN	Signal recognition particle 14 kDa protein	136	1.10451	0.589848	24.688	24.0838	24.0809	23.9744	23.4643	23.6445	9	9	9	8	9	9	9	9	9	8	9	9	9	9	9	8	9	9	89971672	42127616	51434724	50157256	40013716	36184508		1	0.999	8	53	53	53	translation;protein targeting;protein targeting to membrane;cotranslational protein targeting to membrane;SRP-dependent cotranslational protein targeting to membrane;transport;intracellular protein transport;metabolic process;biosynthetic process;macromolecule biosynthetic process;cellular process;gene expression;protein transport;protein metabolic process;cellular macromolecule biosynthetic proc…	nucleic acid binding;RNA binding;signal sequence binding;binding;7S RNA binding;endoplasmic reticulum signal peptide binding;peptide binding;nucleic acid binding;RNA binding;signal sequence binding;binding;7S RNA binding;endoplasmic reticulum signal peptide binding;peptide binding;nucleic acid binding;RNA binding;binding;7S RNA binding	nucleus;nucleolus;cytoplasm;signal recognition particle, endoplasmic reticulum targeting;cytosol;ribonucleoprotein complex;vesicle;membrane-bounded vesicle;macromolecular complex;organelle;membrane-bounded organelle;non-membrane-bounded organelle;intracellular organelle;extracellular organelle;intracellular membrane-bounded organelle;intracellular non-membrane-bounded organelle;extracellular regi…	translation;protein targeting;transport;metabolic process;biosynthetic process;cellular process;protein transport;protein metabolic process;response to chemical stimulus;response to drug;macromolecule metabolic process;cellular metabolic process;primary metabolic process;response to stimulus;establishment of localization;protein targeting;transport;protein transport;establishment of localization;…	nucleus;nucleolus;cytoplasm;cytosol;ribonucleoprotein complex;vesicle;macromolecular complex;organelle;intracellular organelle;extracellular organelle;intracellular membrane-bounded organelle;intracellular non-membrane-bounded organelle;cell part;signal recognition particle;ribonucleoprotein complex;macromolecular complex;cell part;signal recognition particle;ribonucleoprotein complex;macromolecu…
EIF3I	sp|Q13347|EIF3I_HUMAN	Q13347	EIF3I_HUMAN	Eukaryotic translation initiation factor 3 subunit I	325	1.10402	0.591249	24.3486	23.7704	23.6663	23.4359	23.0692	23.5064	11	9	11	9	7	6	11	9	11	9	7	6	11	9	11	9	7	6	72987800	41812980	30449588	29758066	25060500	22355106		1	0.999	10	53	53	53	formation of translation preinitiation complex;translation;translational initiation;regulation of translation;regulation of translational initiation;metabolic process;biosynthetic process;macromolecule biosynthetic process;regulation of biosynthetic process;cellular process;gene expression;regulation of gene expression;regulation of macromolecule biosynthetic process;posttranscriptional regulatio…	nucleic acid binding;RNA binding;translation initiation factor activity;binding;translation factor activity, nucleic acid binding;nucleic acid binding;RNA binding;translation initiation factor activity;binding;translation factor activity, nucleic acid binding	cytosol;eukaryotic translation initiation factor 3 complex;eukaryotic 43S preinitiation complex;ribonucleoprotein complex;vesicle;membrane-bounded vesicle;macromolecular complex;eukaryotic 48S preinitiation complex;organelle;membrane-bounded organelle;extracellular organelle;protein complex;extracellular region part;intracellular part;cytoplasmic part;cell part;extracellular membrane-bounded orga…	translation;translational initiation;regulation of translation;metabolic process;biosynthetic process;cellular process;cellular component organization;protein metabolic process;cellular component assembly;ribonucleoprotein complex assembly;cellular macromolecular complex assembly;macromolecule metabolic process;cellular metabolic process;primary metabolic process;macromolecular complex assembly;b…	cytosol;ribonucleoprotein complex;vesicle;macromolecular complex;organelle;extracellular organelle;protein complex;cell part;ribonucleoprotein complex;macromolecular complex;protein complex;cell part
FSCN1	sp|Q16658|FSCN1_HUMAN	Q16658	FSCN1_HUMAN	Fascin	493	1.09705	0.473895	25.2285	25.1422	24.8778	24.9069	24.3058	24.6142	27	26	27	29	24	31	27	26	27	29	24	31	27	26	27	29	24	31	208599472	251911152	188609856	212028416	130506320	162218688		1	0.999	28	164	164	164	cellular component movement;organelle organization;cytoskeleton organization;actin filament organization;cell proliferation;cellular process;cellular component organization;cell migration;cellular component assembly;actin filament-based process;actin cytoskeleton organization;locomotion;cell motility;actin filament bundle assembly;cellular component organization or biogenesis;cellular component o…	actin binding;binding;protein binding;cytoskeletal protein binding;drug binding;actin filament binding	stress fiber;cytoplasm;cytosol;cytoskeleton;actin cytoskeleton;cell junction;filopodium;vesicle;membrane-bounded vesicle;actin filament bundle;actomyosin;cell projection;organelle;membrane-bounded organelle;non-membrane-bounded organelle;intracellular organelle;extracellular organelle;intracellular non-membrane-bounded organelle;extracellular region part;organelle part;intracellular part;cytoskel…	cellular component movement;organelle organization;cytoskeleton organization;cell proliferation;cellular process;cellular component organization;cellular component assembly;locomotion;cell motility;cellular component movement;organelle organization;cytoskeleton organization;cellular process;cellular component organization;locomotion;cell motility;cellular component movement;organelle organization…	cytoplasm;cytosol;cytoskeleton;filopodium;vesicle;cell projection;organelle;intracellular organelle;extracellular organelle;intracellular non-membrane-bounded organelle;cell part
PSMA4	sp|P25789|PSA4_HUMAN	P25789	PSA4_HUMAN	Proteasome subunit alpha type-4	261	1.09492	0.592621	24.7294	24.2227	24.0423	23.9993	23.4801	23.737	8	6	8	6	5	5	8	6	8	6	5	5	8	6	8	6	5	5	76426128	45897852	61707976	54781492	24681612	30882976		1	0.999	9	38	38	38	G1/S transition of mitotic cell cycle;protein polyubiquitination;mitotic cell cycle;activation of innate immune response;innate immune response activating cell surface receptor signaling pathway;stimulatory C-type lectin receptor signaling pathway;activation of immune response;immune system process;immune response-activating cell surface receptor signaling pathway;antigen processing and presentat…	catalytic activity;endopeptidase activity;threonine-type endopeptidase activity;peptidase activity;hydrolase activity;threonine-type peptidase activity;peptidase activity, acting on L-amino acid peptides;catalytic activity;endopeptidase activity;threonine-type endopeptidase activity;peptidase activity;hydrolase activity;threonine-type peptidase activity;peptidase activity, acting on L-amino acid …	proteasome complex;cytoplasmic mRNA processing body;nucleus;nucleoplasm;cytoplasm;cytosol;proteasome core complex;plasma membrane;membrane;proteasome core complex, alpha-subunit complex;ribonucleoprotein complex;vesicle;membrane-bounded vesicle;macromolecular complex;RNA granule;organelle;membrane-bounded organelle;non-membrane-bounded organelle;intracellular organelle;extracellular organelle;int…	mitotic cell cycle;immune system process;protein modification process;proteolysis;nitrogen compound metabolic process;response to stress;response to DNA damage stimulus;cell cycle;signal transduction;metabolic process;cell death;catabolic process;cellular process;viral reproduction;death;protein metabolic process;regulation of protein modification process;cellular nitrogen compound metabolic proc…	proteasome complex;nucleus;nucleoplasm;cytoplasm;cytosol;plasma membrane;membrane;ribonucleoprotein complex;vesicle;macromolecular complex;organelle;intracellular organelle;extracellular organelle;intracellular membrane-bounded organelle;intracellular non-membrane-bounded organelle;protein complex;cell part;nucleus;cytoplasm;macromolecular complex;organelle;intracellular organelle;intracellular m…
PFAS	sp|O15067|PUR4_HUMAN	O15067	PUR4_HUMAN	Phosphoribosylformylglycinamidine synthase	1338	1.09279	0.527497	22.2763	22.0197	21.882	21.8167	21.1578	21.621	10	13	12	14	12	7	10	13	12	14	12	7	10	13	12	14	12	7	22633378	28737474	17772550	27567750	16830252	14108775		1	0.999	21	68	68	68	organic acid metabolic process;nucleobase-containing compound metabolic process;purine base metabolic process;purine nucleotide metabolic process;purine nucleotide biosynthetic process;IMP biosynthetic process;'de novo' IMP biosynthetic process;cellular amino acid metabolic process;glutamine metabolic process;cellular aromatic compound metabolic process;nucleoside phosphate metabolic process;nitr…	nucleotide binding;catalytic activity;phosphoribosylformylglycinamidine synthase activity;binding;ATP binding;ligase activity;ligase activity, forming carbon-nitrogen bonds;carbon-nitrogen ligase activity, with glutamine as amido-N-donor;purine nucleotide binding;adenyl nucleotide binding;ribonucleotide binding;purine ribonucleotide binding;adenyl ribonucleotide binding;purine ribonucleoside trip…	cytoplasm;cytosol;vesicle;membrane-bounded vesicle;organelle;membrane-bounded organelle;extracellular organelle;extracellular region part;intracellular part;cytoplasmic part;cell part;extracellular membrane-bounded organelle;extracellular vesicular exosome;cytoplasm;intracellular part;cell part	organic acid metabolic process;nucleobase-containing compound metabolic process;cellular amino acid metabolic process;cellular aromatic compound metabolic process;nitrogen compound metabolic process;metabolic process;biosynthetic process;nucleotide metabolic process;amine metabolic process;cellular process;cellular nitrogen compound metabolic process;cellular ketone metabolic process;response to …	cytoplasm;cytosol;vesicle;organelle;extracellular organelle;cell part;cytoplasm;cell part
PPP2CA	sp|P67775|PP2AA_HUMAN	P67775	PP2AA_HUMAN	Serine/threonine-protein phosphatase 2A catalytic subunit alpha isoform	309	1.08694	0.439215	22.7956	22.805	22.4416	22.5362	22.11	22.0784	6	2	5	6	3	5	0	0	1	0	0	0	6	2	5	6	3	5	24142266	11068344	17118120	13934307	8705768	12719139		1	0.999	8	27	1	27	nuclear-transcribed mRNA catabolic process, nonsense-mediated decay;inactivation of MAPK activity;mitotic cell cycle;nuclear-transcribed mRNA catabolic process;regulation of cell growth;regulation of protein phosphorylation;negative regulation of protein phosphorylation;nucleobase-containing compound metabolic process;regulation of DNA replication;regulation of transcription, DNA-dependent;RNA pr…	catalytic activity;phosphoprotein phosphatase activity;protein serine/threonine phosphatase activity;binding;hydrolase activity;hydrolase activity, acting on ester bonds;phosphatase activity;phosphoric ester hydrolase activity;ion binding;cation binding;metal ion binding;catalytic activity;phosphoprotein phosphatase activity;hydrolase activity;hydrolase activity, acting on ester bonds;phosphatase…	protein phosphatase type 2A complex;chromosome, centromeric region;spindle pole;nucleus;mitochondrion;cytosol;cytoskeleton;plasma membrane;protein serine/threonine phosphatase complex;microtubule cytoskeleton;membrane;vesicle;membrane-bounded vesicle;macromolecular complex;organelle;membrane-bounded organelle;non-membrane-bounded organelle;intracellular organelle;extracellular organelle;intracell…	mitotic cell cycle;nucleobase-containing compound metabolic process;RNA processing;RNA catabolic process;protein complex assembly;protein modification process;protein dephosphorylation;lipid metabolic process;phosphorus metabolic process;nitrogen compound metabolic process;cell cycle;signal transduction;metabolic process;cell death;RNA splicing;catabolic process;response to endogenous stimulus;ce…	nucleus;mitochondrion;cytosol;cytoskeleton;plasma membrane;protein serine/threonine phosphatase complex;membrane;vesicle;macromolecular complex;organelle;intracellular organelle;extracellular organelle;intracellular membrane-bounded organelle;intracellular non-membrane-bounded organelle;protein complex;cell part;cytosol;plasma membrane;protein serine/threonine phosphatase complex;membrane;macromo…
ALB	sp|P02769|ALBU_BOVIN	P02769	ALBU_BOVIN	Albumin	607	1.0856	2.00095	28.0337	25.6271	28.3494	25.5533	25.229	25.2251	71	40	72	31	35	40	65	36	66	26	30	36	71	40	72	31	35	40	2133124990	308321856	2856123140	324392640	304529536	300637408		1	0.999	46	289	259	289	cell activation;tissue homeostasis;retina homeostasis;cytolysis by symbiont of host cells;cell killing;killing by symbiont of host cells;platelet degranulation;organic acid metabolic process;lipid metabolic process;transport;ion transport;anion transport;exocytosis;endocytosis;receptor-mediated endocytosis;response to stress;cell communication;response to nutrient;blood coagulation;hemostasis;beh…	nucleic acid binding;DNA binding;binding;fatty acid binding;copper ion binding;protein binding;drug binding;zinc ion binding;lipid binding;toxin binding;antioxidant activity;vitamin binding;pyridoxal phosphate binding;carboxylic acid binding;monocarboxylic acid binding;ion binding;cation binding;metal ion binding;transition metal ion binding;cofactor binding;chaperone binding;vitamin B6 binding	extracellular region;basement membrane;extracellular space;nucleus;platelet alpha granule lumen;membrane-enclosed lumen;vesicle;vesicle lumen;membrane-bounded vesicle;macromolecular complex;secretory granule lumen;organelle;membrane-bounded organelle;intracellular organelle;extracellular organelle;intracellular membrane-bounded organelle;organelle lumen;protein complex;extracellular matrix part;e…	cell activation;cell killing;organic acid metabolic process;lipid metabolic process;transport;ion transport;exocytosis;endocytosis;response to stress;cell communication;behavior;metabolic process;response to external stimulus;cellular process;response to extracellular stimulus;membrane invagination;organic acid transport;cellular component organization;cellular membrane organization;vesicle-media…	extracellular region;extracellular space;nucleus;vesicle;macromolecular complex;organelle;intracellular organelle;extracellular organelle;intracellular membrane-bounded organelle;protein complex;cell part;extracellular space;extracellular space;extracellular space;extracellular space;extracellular space;extracellular space;extracellular space
TAGLN	sp|Q01995|TAGL_HUMAN	Q01995	TAGL_HUMAN	Transgelin	201	1.08438	1.01238	25.145	23.8824	23.9593	23.6072	23.0547	23.2876	19	11	11	15	10	10	19	11	11	15	10	10	19	11	11	15	10	10	208498592	48331096	62328128	57489516	34067964	47372728		1	0.999	15	76	76	76	muscle organ development;cellular process;cell differentiation;epithelial cell differentiation;developmental process;organ development;anatomical structure development;cellular developmental process;muscle structure development		cytoplasm;intracellular part;cell part	cellular process;cell differentiation;developmental process;anatomical structure development	cytoplasm;cell part
UBE2V1	sp|Q13404|UB2V1_HUMAN	Q13404	UB2V1_HUMAN	Ubiquitin-conjugating enzyme E2 variant 1	147	1.08157	1.00452	25.0774	23.8512	23.9059	23.5745	22.9677	23.2787	5	3	4	3	3	3	1	1	1	1	1	1	5	3	4	3	3	3	84337544	33290448	34512176	27996320	22153418	20700874		0.9996	0.9989	5	21	6	21	protein polyubiquitination;activation of innate immune response;innate immune response activating cell surface receptor signaling pathway;pattern recognition receptor signaling pathway;stimulatory C-type lectin receptor signaling pathway;toll-like receptor signaling pathway;activation of immune response;immune system process;immune response-activating cell surface receptor signaling pathway;regul…	catalytic activity;binding;protein binding;ligase activity;ligase activity, forming carbon-nitrogen bonds;acid-amino acid ligase activity;small conjugating protein ligase activity;enzyme binding;ubiquitin protein ligase binding	ubiquitin ligase complex;nucleus;cytoplasm;cytosol;ubiquitin conjugating enzyme complex;vesicle;membrane-bounded vesicle;macromolecular complex;UBC13-UEV1A complex;organelle;membrane-bounded organelle;intracellular organelle;extracellular organelle;intracellular membrane-bounded organelle;protein complex;extracellular region part;intracellular part;cytoplasmic part;cell part;extracellular membran…	immune system process;nucleobase-containing compound metabolic process;DNA metabolic process;DNA repair;protein modification process;nitrogen compound metabolic process;response to stress;response to DNA damage stimulus;signal transduction;metabolic process;cellular process;protein metabolic process;cell differentiation;developmental process;cellular nitrogen compound metabolic process;macromolec…	ubiquitin ligase complex;nucleus;cytoplasm;cytosol;ubiquitin conjugating enzyme complex;vesicle;macromolecular complex;organelle;intracellular organelle;extracellular organelle;intracellular membrane-bounded organelle;protein complex;cell part
RNH1	sp|P13489|RINI_HUMAN	P13489	RINI_HUMAN	Ribonuclease inhibitor	461	1.08104	1.19248	21.9468	21.3447	NaN	NaN	20.6626	20.2439	3	4	1	2	3	3	3	4	1	2	3	3	3	4	1	2	3	3	9834062	6443534	874515	940564	1.7866e+06	3177126		1	0.999	7	16	16	16	nucleobase-containing compound metabolic process;RNA catabolic process;mRNA catabolic process;nitrogen compound metabolic process;metabolic process;catabolic process;macromolecule catabolic process;cellular process;RNA metabolic process;mRNA metabolic process;regulation of metabolic process;regulation of anatomical structure morphogenesis;cellular nitrogen compound metabolic process;negative regu…	enzyme inhibitor activity;ribonuclease inhibitor activity;enzyme regulator activity	cytoplasm;vesicle;membrane-bounded vesicle;angiogenin-PRI complex;macromolecular complex;organelle;membrane-bounded organelle;extracellular organelle;protein complex;extracellular region part;intracellular part;cell part;extracellular membrane-bounded organelle;extracellular vesicular exosome;cytoplasm;intracellular part;cell part;cytoplasm;intracellular part;cell part;cytoplasm;intracellular par…	nucleobase-containing compound metabolic process;RNA catabolic process;nitrogen compound metabolic process;metabolic process;catabolic process;cellular process;RNA metabolic process;mRNA metabolic process;cellular nitrogen compound metabolic process;macromolecule metabolic process;cellular metabolic process;primary metabolic process;biological regulation	cytoplasm;vesicle;macromolecular complex;organelle;extracellular organelle;protein complex;cell part;cytoplasm;cell part;cytoplasm;cell part;cytoplasm;cell part;cytoplasm;cell part;cytoplasm;cell part;cytoplasm;cell part
GSR	sp|P00390|GSHR_HUMAN	P00390	GSHR_HUMAN	Glutathione reductase, mitochondrial	522	1.07772	0.457446	23.5614	23.3392	23.0214	23.0088	22.6066	22.9342	9	9	7	10	7	5	9	9	7	10	7	5	9	9	7	10	7	5	49200656	44586632	26644968	34507160	21948292	23962128		1	0.999	10	47	47	47	response to reactive oxygen species;organic acid metabolic process;nucleobase-containing compound metabolic process;transcription initiation, DNA-dependent;transcription initiation from RNA polymerase II promoter;peptide metabolic process;cellular amino acid metabolic process;cellular modified amino acid metabolic process;glutathione metabolic process;sulfur compound metabolic process;nitrogen co…	nucleotide binding;catalytic activity;glutathione-disulfide reductase activity;binding;electron carrier activity;disulfide oxidoreductase activity;peptide disulfide oxidoreductase activity;glutathione disulfide oxidoreductase activity;antioxidant activity;oxidoreductase activity;oxidoreductase activity, acting on NADH or NADPH;oxidoreductase activity, acting on a sulfur group of donors;oxidoreduc…	mitochondrial matrix;cytosol;external side of plasma membrane;membrane-enclosed lumen;vesicle;membrane-bounded vesicle;organelle;membrane-bounded organelle;extracellular organelle;organelle lumen;extracellular region part;organelle part;intracellular part;membrane part;mitochondrial part;cytoplasmic part;intracellular organelle part;plasma membrane part;cell part;extracellular membrane-bounded or…	organic acid metabolic process;nucleobase-containing compound metabolic process;transcription initiation, DNA-dependent;peptide metabolic process;cellular amino acid metabolic process;sulfur compound metabolic process;nitrogen compound metabolic process;response to stress;response to oxidative stress;metabolic process;biosynthetic process;amine metabolic process;cellular process;nucleobase-contai…	cytosol;vesicle;organelle;extracellular organelle;cell part
RANBP1	sp|P43487|RANG_HUMAN	P43487	RANG_HUMAN	Ran-specific GTPase-activating protein	201	1.07771	1.00721	24.1446	23.3469	23.2347	22.7517	NaN	22.3846	5	3	3	3	1	3	5	3	3	3	1	3	5	3	3	3	1	3	42465496	17861066	8957565	13131040	3861396	10651486		1	0.999	4	18	18	18	transport;signal transduction;cellular process;viral reproduction;regulation of metabolic process;intracellular transport;regulation of biological process;regulation of catalytic activity;regulation of cellular process;response to stimulus;establishment of localization;establishment of localization in cell;cellular response to stimulus;biological regulation;regulation of molecular function;transp…	small GTPase regulator activity;GDP-dissociation inhibitor activity;GTPase activator activity;binding;protein binding;enzyme activator activity;Ran GTPase binding;Ras GTPase binding;enzyme binding;enzyme regulator activity;GTPase regulator activity;small GTPase binding;GTPase binding;nucleoside-triphosphatase regulator activity	nucleus;nuclear envelope;cytoplasm;organelle envelope;envelope;organelle;membrane-bounded organelle;intracellular organelle;intracellular membrane-bounded organelle;organelle part;intracellular part;nuclear part;intracellular organelle part;cell part;cytoplasm;centrosome;microtubule organizing center;organelle;non-membrane-bounded organelle;intracellular organelle;intracellular non-membrane-bound…	transport;signal transduction;cellular process;viral reproduction;response to stimulus;establishment of localization;biological regulation;transport;establishment of localization;transport;establishment of localization;transport;establishment of localization;transport;establishment of localization;transport;establishment of localization;transport;establishment of localization;transport;organelle …	nucleus;nuclear envelope;cytoplasm;organelle;intracellular organelle;intracellular membrane-bounded organelle;cell part;cytoplasm;centrosome;microtubule organizing center;organelle;intracellular organelle;intracellular non-membrane-bounded organelle;cell part
LGALS1	sp|P09382|LEG1_HUMAN	P09382	LEG1_HUMAN	Galectin-1	135	1.07649	0.878566	26.6958	25.5191	25.8049	25.3414	24.846	25.1967	13	14	11	9	9	15	13	14	11	9	9	15	13	14	11	9	9	15	421643680	199109776	215574336	150133168	108585128	153937136		1	0.999	9	71	71	71	cellular glucose homeostasis;cell activation;immune effector process;cell activation involved in immune response;lymphocyte activation involved in immune response;B cell activation involved in immune response;mature B cell differentiation involved in immune response;plasma cell differentiation;mature B cell differentiation;leukocyte activation involved in immune response;immune system process;leu…	signal transducer activity;binding;sugar binding;galactoside binding;carbohydrate binding;lactose binding;monosaccharide binding;disaccharide binding;molecular transducer activity	proteinaceous extracellular matrix;extracellular space;intracellular;nucleus;cytoplasm;cell surface;extracellular matrix;vesicle;membrane-bounded vesicle;organelle;membrane-bounded organelle;intracellular organelle;extracellular organelle;intracellular membrane-bounded organelle;extracellular region part;intracellular part;cell part;extracellular membrane-bounded organelle;extracellular vesicular…	cell activation;immune system process;response to stress;signal transduction;cell death;cellular process;death;cellular homeostasis;cell differentiation;multicellular organismal process;developmental process;response to chemical stimulus;response to drug;homeostatic process;response to stimulus;biological regulation	proteinaceous extracellular matrix;extracellular space;intracellular;nucleus;cytoplasm;cell surface;extracellular matrix;vesicle;organelle;intracellular organelle;extracellular organelle;intracellular membrane-bounded organelle;cell part
RBM8A	sp|Q9Y5S9|RBM8A_HUMAN	Q9Y5S9	RBM8A_HUMAN	RNA-binding protein 8A	174	1.07345	1.46639	23.1935	22.4072	22.2423	21.731	NaN	20.5648	6	4	3	3	2	2	6	4	3	3	2	2	6	4	3	3	2	2	22365942	8977140	9468348	5.59076e+06	1791782	3042961		1	0.999	5	20	20	20	nuclear-transcribed mRNA catabolic process, nonsense-mediated decay;RNA splicing, via transesterification reactions;RNA splicing, via transesterification reactions with bulged adenosine as nucleophile;regulation of alternative nuclear mRNA splicing, via spliceosome;nuclear mRNA splicing, via spliceosome;nuclear-transcribed mRNA catabolic process;nucleobase-containing compound metabolic process;tr…	nucleotide binding;nucleic acid binding;RNA binding;mRNA binding;binding	nucleus;nucleoplasm;spliceosomal complex;cytoplasm;cytosol;nuclear body;nuclear speck;ribonucleoprotein complex;macromolecular complex;exon-exon junction complex;organelle;membrane-bounded organelle;intracellular organelle;intracellular membrane-bounded organelle;protein complex;organelle part;intracellular part;nuclear part;cytoplasmic part;intracellular organelle part;nucleoplasm part;cell part…	nucleobase-containing compound metabolic process;transcription termination, DNA-dependent;transcription from RNA polymerase II promoter;RNA processing;mRNA processing;RNA catabolic process;regulation of translation;nitrogen compound metabolic process;transport;nucleocytoplasmic transport;metabolic process;RNA splicing;catabolic process;biosynthetic process;cellular process;nucleobase-containing c…	nucleus;nucleoplasm;spliceosomal complex;cytoplasm;cytosol;ribonucleoprotein complex;macromolecular complex;organelle;intracellular organelle;intracellular membrane-bounded organelle;protein complex;cell part
PCMT1	sp|P22061|PIMT_HUMAN	P22061	PIMT_HUMAN	Protein-L-isoaspartate(D-aspartate) O-methyltransferase	227	1.0734	0.702944	23.0644	22.655	22.3288	22.3146	21.5588	22.066	6	3	3	3	2	3	6	3	3	3	2	3	6	3	3	3	2	3	19527234	12088286	8526981	6.41354e+06	4533560	7032306		1	0.999	5	20	20	20	protein modification process;protein methylation;one-carbon metabolic process;metabolic process;protein alkylation;cellular process;protein metabolic process;protein repair;methylation;macromolecule metabolic process;macromolecule modification;macromolecule methylation;cellular metabolic process;primary metabolic process;cellular macromolecule metabolic process;cellular protein metabolic process;…	catalytic activity;protein-L-isoaspartate (D-aspartate) O-methyltransferase activity;methyltransferase activity;O-methyltransferase activity;protein methyltransferase activity;S-adenosylmethionine-dependent methyltransferase activity;carboxyl-O-methyltransferase activity;transferase activity;transferase activity, transferring one-carbon groups;protein carboxyl O-methyltransferase activity;catalyt…	cytoplasm;endoplasmic reticulum;vesicle;membrane-bounded vesicle;organelle;membrane-bounded organelle;intracellular organelle;extracellular organelle;intracellular membrane-bounded organelle;extracellular region part;intracellular part;cytoplasmic part;cell part;extracellular membrane-bounded organelle;extracellular vesicular exosome;cytoplasm;intracellular part;cell part	protein modification process;one-carbon metabolic process;metabolic process;protein alkylation;cellular process;protein metabolic process;macromolecule metabolic process;macromolecule modification;cellular metabolic process;primary metabolic process;small molecule metabolic process;organic acid metabolic process;nucleobase-containing compound metabolic process;cellular amino acid metabolic proces…	cytoplasm;endoplasmic reticulum;vesicle;organelle;intracellular organelle;extracellular organelle;intracellular membrane-bounded organelle;cell part;cytoplasm;cell part
HSP90AA1	sp|P07900|HS90A_HUMAN	P07900	HS90A_HUMAN	Heat shock protein HSP 90-alpha	732	1.06952	0.531783	26.7224	26.1271	26.1103	25.9903	25.5792	25.795	47	35	42	38	32	38	39	28	34	28	26	32	79	65	73	68	64	72	767261760	466849440	453519616	437100448	289875680	379142752		1	0.999	49	232	187	421	G2/M transition of mitotic cell cycle;mitotic cell cycle;neuron migration;immune system process;system process;skeletal muscle contraction;muscle system process;protein folding;protein complex assembly;protein targeting;protein targeting to membrane;protein targeting to mitochondrion;nitrogen compound metabolic process;transport;mitochondrial transport;intracellular protein transport;endocytosis;…	nucleotide binding;UTP binding;CTP binding;nucleic acid binding;RNA binding;mRNA binding;antigen binding;catalytic activity;binding;protein binding;ATP binding;GTP binding;pyrophosphatase activity;hydrolase activity;hydrolase activity, acting on acid anhydrides;hydrolase activity, acting on acid anhydrides, in phosphorus-containing anhydrides;ATPase activity;purine nucleotide binding;nucleoside-t…	extracellular region;nucleus;nucleoplasm;cytoplasm;mitochondrion;cytosol;plasma membrane;cell surface;membrane;cytoplasmic membrane-bounded vesicle;basolateral plasma membrane;apical plasma membrane;extracellular matrix;cell projection membrane;cytoplasmic vesicle;brush border membrane;membrane-enclosed lumen;vesicle;vesicle lumen;membrane-bounded vesicle;macromolecular complex;melanosome;cell pr…	mitotic cell cycle;immune system process;protein folding;protein complex assembly;protein targeting;nitrogen compound metabolic process;transport;endocytosis;cellular component movement;muscle contraction;response to stress;response to osmotic stress;organelle organization;mitochondrion organization;cell cycle;signal transduction;metabolic process;cell death;response to heat;response to external …	extracellular region;nucleus;nucleoplasm;cytoplasm;mitochondrion;cytosol;plasma membrane;cell surface;membrane;cytoplasmic membrane-bounded vesicle;extracellular matrix;vesicle;macromolecular complex;cell projection;neuron projection;neuronal cell body;organelle;intracellular organelle;extracellular organelle;intracellular membrane-bounded organelle;protein complex;cell body;cell part
XRCC6	sp|P12956|XRCC6_HUMAN	P12956	XRCC6_HUMAN	X-ray repair cross-complementing protein 6	609	1.06806	0.541052	25.9744	25.7345	25.5019	25.5543	24.8829	25.1503	50	52	48	54	49	52	50	52	48	54	49	52	50	52	48	54	49	52	418787552	416707968	346712864	381446176	223747344	268646144		1	0.999	37	305	305	305	telomere maintenance;non-recombinational repair;regulation of cytokine production;positive regulation of cytokine production;somatic diversification of immune receptors;immune system process;somatic diversification of immune receptors via germline recombination within a single locus;nucleobase-containing compound metabolic process;DNA metabolic process;DNA ligation;DNA repair;double-strand break …	nucleotide binding;regulatory region DNA binding;regulatory region nucleic acid binding;nucleic acid binding;DNA binding;DNA helicase activity;damaged DNA binding;double-stranded DNA binding;catalytic activity;ATP-dependent DNA helicase activity;helicase activity;binding;protein binding;ATP binding;protein C-terminus binding;ATP-dependent helicase activity;DNA-dependent ATPase activity;pyrophosph…	telomere cap complex;nuclear telomere cap complex;nucleus;nucleoplasm;transcription factor complex;nucleolus;cytosol;membrane;macromolecular complex;protein-DNA complex;organelle;membrane-bounded organelle;non-membrane-bounded organelle;intracellular organelle;intracellular membrane-bounded organelle;intracellular non-membrane-bounded organelle;protein complex;Ku70:Ku80 complex;organelle part;int…	immune system process;nucleobase-containing compound metabolic process;DNA metabolic process;DNA ligation;DNA repair;DNA recombination;nitrogen compound metabolic process;response to stress;response to osmotic stress;response to DNA damage stimulus;organelle organization;metabolic process;biosynthetic process;response to abiotic stimulus;cellular process;viral reproduction;cellular component orga…	telomere cap complex;nucleus;nucleoplasm;transcription factor complex;nucleolus;cytosol;membrane;macromolecular complex;organelle;intracellular organelle;intracellular membrane-bounded organelle;intracellular non-membrane-bounded organelle;protein complex;cell part;nucleolus;cytoplasm;macromolecular complex;organelle;intracellular organelle;intracellular non-membrane-bounded organelle;protein com…
SF3A3	sp|Q12874|SF3A3_HUMAN	Q12874	SF3A3_HUMAN	Splicing factor 3A subunit 3	501	1.06705	0.476737	23.0986	22.7303	22.6022	22.6043	22.0938	22.3027	4	4	3	3	2	2	4	4	3	3	2	2	4	4	3	3	2	2	12075737	10059838	12074334	9261260	6532402	7.27122e+06		1	0.999	7	18	18	18	RNA splicing, via transesterification reactions;RNA splicing, via transesterification reactions with bulged adenosine as nucleophile;nuclear mRNA 3'-splice site recognition;nuclear mRNA splicing, via spliceosome;nucleobase-containing compound metabolic process;mRNA splice site selection;RNA processing;mRNA processing;nitrogen compound metabolic process;metabolic process;RNA splicing;cellular proc…	binding;zinc ion binding;ion binding;cation binding;metal ion binding;transition metal ion binding	nucleoplasm;spliceosomal complex;nuclear body;nuclear speck;ribonucleoprotein complex;macromolecular complex;organelle part;intracellular part;nuclear part;intracellular organelle part;nucleoplasm part;cell part;catalytic step 2 spliceosome	nucleobase-containing compound metabolic process;RNA processing;mRNA processing;nitrogen compound metabolic process;metabolic process;RNA splicing;cellular process;cellular component organization;RNA metabolic process;mRNA metabolic process;cellular component assembly;ribonucleoprotein complex assembly;cellular macromolecular complex assembly;cellular nitrogen compound metabolic process;macromole…	nucleoplasm;spliceosomal complex;ribonucleoprotein complex;macromolecular complex;cell part
PTGES3	sp|Q15185|TEBP_HUMAN	Q15185	TEBP_HUMAN	Prostaglandin E synthase 3	160	1.06587	0.965695	27.8047	26.7366	26.839	26.6325	25.7522	26.0986	6	8	6	9	7	9	6	8	6	9	7	9	6	8	6	9	7	9	75069544	462530944	286701632	294437120	21665478	227048304		1	0.999	7	45	45	45	very long-chain fatty acid metabolic process;telomere maintenance;prostaglandin biosynthetic process;organic acid metabolic process;nucleobase-containing compound metabolic process;DNA metabolic process;DNA replication;RNA-dependent DNA replication;protein folding;lipid metabolic process;fatty acid metabolic process;fatty acid biosynthetic process;unsaturated fatty acid biosynthetic process;icosa…	telomerase activity;catalytic activity;RNA-directed DNA polymerase activity;binding;protein binding;transferase activity;transferase activity, transferring phosphorus-containing groups;nucleotidyltransferase activity;isomerase activity;intramolecular oxidoreductase activity;DNA polymerase activity;prostaglandin-E synthase activity;unfolded protein binding	chromosome, telomeric region;nucleus;nucleoplasm;telomerase holoenzyme complex;cytoplasm;cytosol;ribonucleoprotein complex;vesicle;membrane-bounded vesicle;macromolecular complex;organelle;membrane-bounded organelle;intracellular organelle;extracellular organelle;intracellular membrane-bounded organelle;extracellular region part;organelle part;intracellular part;chromosomal part;nuclear part;cyto…	organic acid metabolic process;nucleobase-containing compound metabolic process;DNA metabolic process;DNA replication;protein folding;lipid metabolic process;nitrogen compound metabolic process;response to stress;organelle organization;signal transduction;metabolic process;biosynthetic process;response to heat;response to abiotic stimulus;cellular process;cellular component organization;protein m…	nucleus;nucleoplasm;telomerase holoenzyme complex;cytoplasm;cytosol;ribonucleoprotein complex;vesicle;macromolecular complex;organelle;intracellular organelle;extracellular organelle;intracellular membrane-bounded organelle;cell part;nucleoplasm;cytoplasm;cell part
PLS3	sp|P13797|PLST_HUMAN	P13797	PLST_HUMAN	Plastin-3	630	1.06477	0.773911	24.6436	23.9017	23.691	23.5647	22.9534	23.3965	37	31	27	24	25	26	30	23	21	18	20	20	37	31	27	24	25	26	317209952	177819984	141818960	98501328	69314968	97936048		1	0.999	35	170	132	170	developmental process;anatomical structure development;bone development	binding;calcium ion binding;ion binding;cation binding;metal ion binding;binding;calcium ion binding;ion binding;cation binding;metal ion binding;binding;calcium ion binding;ion binding;cation binding;metal ion binding	cytoplasm;intracellular part;cell part	developmental process;anatomical structure development	cytoplasm;cell part
CCT5	sp|P48643|TCPE_HUMAN	P48643	TCPE_HUMAN	T-complex protein 1 subunit epsilon	541	1.06282	0.661488	25.3025	24.6128	24.5388	24.4696	23.9241	24.0759	36	34	35	32	25	23	35	34	35	31	25	23	36	34	35	32	25	23	321540704	164138864	160876272	151981744	101451016	112990496		1	0.999	30	185	183	185	protein folding;'de novo' protein folding;binding of sperm to zona pellucida;cell recognition;metabolic process;response to biotic stimulus;response to virus;cellular process;cell-cell recognition;protein metabolic process;reproductive process;sperm-egg recognition;macromolecule metabolic process;cellular metabolic process;primary metabolic process;cellular macromolecule metabolic process;cellula…	nucleotide binding;binding;protein binding;ATP binding;cytoskeletal protein binding;tubulin binding;purine nucleotide binding;adenyl nucleotide binding;G-protein beta-subunit binding;ribonucleotide binding;purine ribonucleotide binding;adenyl ribonucleotide binding;purine ribonucleoside triphosphate binding;beta-tubulin binding;nucleotide binding;binding;ATP binding;purine nucleotide binding;aden…	nucleolus;cytoplasm;centrosome;microtubule organizing center;cytosol;chaperonin-containing T-complex;microtubule;vesicle;membrane-bounded vesicle;macromolecular complex;organelle;membrane-bounded organelle;non-membrane-bounded organelle;intracellular organelle;extracellular organelle;intracellular non-membrane-bounded organelle;protein complex;cell body;extracellular region part;organelle part;in…	protein folding;cell recognition;metabolic process;response to biotic stimulus;cellular process;protein metabolic process;macromolecule metabolic process;cellular metabolic process;primary metabolic process;response to stimulus;multi-organism process;protein folding;metabolic process;cellular process;protein metabolic process;macromolecule metabolic process;cellular metabolic process;primary meta…	nucleolus;cytoplasm;centrosome;microtubule organizing center;cytosol;vesicle;macromolecular complex;organelle;intracellular organelle;extracellular organelle;intracellular non-membrane-bounded organelle;protein complex;cell body;cell part;nucleolus;cytoplasm;organelle;intracellular organelle;intracellular non-membrane-bounded organelle;cell part;nucleolus;cytoplasm;organelle;intracellular organel…
PARK7	sp|Q99497|PARK7_HUMAN	Q99497	PARK7_HUMAN	Parkinson disease protein 7	189	1.06094	0.822041	25.1028	24.2713	23.9649	23.788	23.3666	23.7184	13	9	9	7	8	9	13	9	9	7	8	9	13	9	9	7	8	9	116108408	51022460	42936216	36638748	30305538	35743688		1	0.999	9	55	55	55	response to reactive oxygen species;neurotransmitter uptake;regulation of neurotransmitter levels;regulation of cytokine production;positive regulation of cytokine production;regulation of protein phosphorylation;negative regulation of protein phosphorylation;positive regulation of protein phosphorylation;alcohol metabolic process;cellular aldehyde metabolic process;organic acid metabolic process…	protein binding transcription factor activity;transcription factor binding transcription factor activity;nucleic acid binding;transcription cofactor activity;transcription coactivator activity;RNA binding;mRNA binding;catalytic activity;receptor binding;binding;copper ion binding;protein binding;transcription factor binding;peptidase activity;oxidoreductase activity;metallochaperone activity;copp…	chromatin;nucleus;cytoplasm;mitochondrion;mitochondrial intermembrane space;mitochondrial matrix;cytosol;plasma membrane;membrane;nuclear body;PML body;axon;organelle envelope lumen;membrane-enclosed lumen;vesicle;membrane-bounded vesicle;cell projection;neuron projection;organelle;membrane-bounded organelle;intracellular organelle;extracellular organelle;intracellular membrane-bounded organelle;…	alcohol metabolic process;cellular aldehyde metabolic process;organic acid metabolic process;protein modification process;transport;neurotransmitter transport;cellular ion homeostasis;autophagy;response to stress;response to oxidative stress;organelle organization;mitochondrion organization;signal transduction;behavior;metabolic process;catabolic process;biosynthetic process;cellular process;amin…	nucleus;cytoplasm;mitochondrion;cytosol;plasma membrane;membrane;vesicle;cell projection;neuron projection;organelle;intracellular organelle;extracellular organelle;intracellular membrane-bounded organelle;cell body;cell part
WARS1	sp|P23381|SYWC_HUMAN	P23381	SYWC_HUMAN	Tryptophan--tRNA ligase, cytoplasmic	471	1.06094	0.524062	23.9506	23.4576	23.2663	23.2457	22.87	22.9866	12	10	8	11	7	5	12	10	8	11	7	5	12	10	8	11	7	5	77413808	69942640	22165580	24462020	14873115	11432860		1	0.999	13	53	53	53
C1QBP	sp|Q07021|C1QBP_HUMAN	Q07021	C1QBP_HUMAN	Complement component 1 Q subcomponent-binding protein, mitochondrial	282	1.0572	1.05325	24.8304	23.5471	23.7054	23.2107	22.5012	23.2113	9	5	6	5	4	6	9	5	6	5	4	6	9	5	6	5	4	6	81605560	27664576	31775696	21111258	13229159	22504212		1	0.999	6	35	35	35	negative regulation of transcription from RNA polymerase II promoter;regulation of cytokine production;negative regulation of cytokine production;immune effector process;activation of immune response;immune system process;regulation of acute inflammatory response;regulation of immune system process;negative regulation of immune system process;positive regulation of immune system process;regulatio…	protein binding transcription factor activity;transcription factor binding transcription factor activity;G-protein-coupled receptor binding;opsonin binding;complement binding;complement component C1q binding;pattern binding;nucleic acid binding;transcription cofactor activity;transcription corepressor activity;RNA binding;mRNA binding;receptor binding;binding;protein binding;glycosaminoglycan bin…	extracellular space;nucleus;nucleolus;cytoplasm;mitochondrion;mitochondrial matrix;cytosol;plasma membrane;cell surface;membrane;membrane-enclosed lumen;organelle;membrane-bounded organelle;non-membrane-bounded organelle;intracellular organelle;intracellular membrane-bounded organelle;intracellular non-membrane-bounded organelle;organelle lumen;extracellular region part;organelle part;intracellul…	immune system process;nucleobase-containing compound metabolic process;RNA processing;mRNA processing;regulation of translation;nitrogen compound metabolic process;response to stress;signal transduction;metabolic process;cell death;RNA splicing;biosynthetic process;cellular process;viral reproduction;cellular component organization;RNA metabolic process;mRNA metabolic process;death;protein metabo…	extracellular space;nucleus;nucleolus;cytoplasm;mitochondrion;cytosol;plasma membrane;cell surface;membrane;organelle;intracellular organelle;intracellular membrane-bounded organelle;intracellular non-membrane-bounded organelle;cell part;cell part;cell part
EFTUD2	sp|Q15029|U5S1_HUMAN	Q15029	U5S1_HUMAN	116 kDa U5 small nuclear ribonucleoprotein component	972	1.05114	0.483905	23.0187	22.8466	22.5734	22.6736	22.1858	22.1275	20	17	14	20	14	15	20	17	14	20	14	15	21	18	16	21	15	16	71529912	56934428	40530200	50061116	34371848	35619432		1	0.999	24	100	100	107	RNA splicing, via transesterification reactions;RNA splicing, via transesterification reactions with bulged adenosine as nucleophile;nuclear mRNA splicing, via spliceosome;nucleobase-containing compound metabolic process;RNA processing;mRNA processing;nitrogen compound metabolic process;metabolic process;RNA splicing;cellular process;gene expression;RNA metabolic process;mRNA metabolic process;ce…	nucleotide binding;catalytic activity;GTPase activity;binding;GTP binding;pyrophosphatase activity;hydrolase activity;hydrolase activity, acting on acid anhydrides;hydrolase activity, acting on acid anhydrides, in phosphorus-containing anhydrides;purine nucleotide binding;nucleoside-triphosphatase activity;guanyl nucleotide binding;ribonucleotide binding;purine ribonucleotide binding;guanyl ribon…	nucleoplasm;spliceosomal complex;cytoplasm;Cajal body;membrane;nuclear body;nuclear speck;ribonucleoprotein complex;macromolecular complex;organelle part;intracellular part;nuclear part;intracellular organelle part;nucleoplasm part;cell part;catalytic step 2 spliceosome	nucleobase-containing compound metabolic process;RNA processing;mRNA processing;nitrogen compound metabolic process;metabolic process;RNA splicing;cellular process;RNA metabolic process;mRNA metabolic process;cellular nitrogen compound metabolic process;macromolecule metabolic process;cellular metabolic process;primary metabolic process	nucleoplasm;spliceosomal complex;cytoplasm;membrane;ribonucleoprotein complex;macromolecular complex;cell part
TKT	sp|P29401|TKT_HUMAN	P29401	TKT_HUMAN	Transketolase	623	1.04222	0.437735	27.93	27.6235	27.464	27.3557	26.9513	27.3972	68	68	61	58	59	65	68	68	61	58	59	65	68	68	61	58	59	65	2496686590	1773216900	1659870720	1554478340	1234584960	1549020420		1	0.999	37	379	379	379	carbohydrate metabolic process;monosaccharide metabolic process;xylulose metabolic process;xylulose biosynthetic process;glucose metabolic process;glucose catabolic process;alcohol metabolic process;cellular aldehyde metabolic process;generation of precursor metabolites and energy;pentose-phosphate shunt;energy reserve metabolic process;nucleobase-containing compound metabolic process;coenzyme me…	catalytic activity;transketolase activity;binding;protein binding;transferase activity;transferase activity, transferring aldehyde or ketonic groups;identical protein binding;protein homodimerization activity;ion binding;cation binding;metal ion binding;protein dimerization activity;cofactor binding;catalytic activity	nucleus;nucleoplasm;peroxisome;cytosol;vesicle;membrane-bounded vesicle;microbody;organelle;membrane-bounded organelle;intracellular organelle;extracellular organelle;intracellular membrane-bounded organelle;extracellular region part;organelle part;intracellular part;nuclear part;cytoplasmic part;intracellular organelle part;cell part;extracellular membrane-bounded organelle;extracellular vesicul…	carbohydrate metabolic process;alcohol metabolic process;cellular aldehyde metabolic process;generation of precursor metabolites and energy;energy reserve metabolic process;nucleobase-containing compound metabolic process;nitrogen compound metabolic process;metabolic process;catabolic process;biosynthetic process;nucleotide metabolic process;cellular process;cellular nitrogen compound metabolic p…	nucleus;nucleoplasm;peroxisome;cytosol;vesicle;microbody;organelle;intracellular organelle;extracellular organelle;intracellular membrane-bounded organelle;cell part;nucleoplasm;cell part
UBE2I	sp|P63279|UBC9_HUMAN	P63279	UBC9_HUMAN	SUMO-conjugating enzyme UBC9	158	1.04185	0.542608	23.8246	23.2728	23.2178	23.1908	22.7076	22.7889	6	4	5	6	4	5	6	4	5	6	4	5	6	4	5	6	4	5	31052084	24484800	25935340	22960160	13467996	19558216		1	0.999	5	30	30	30	negative regulation of transcription from RNA polymerase II promoter;nuclear division;regulation of transcription, DNA-dependent;regulation of transcription from RNA polymerase II promoter;protein modification process;proteolysis;ubiquitin-dependent protein catabolic process;organelle organization;chromosome segregation;mitosis;metabolic process;catabolic process;macromolecule catabolic process;r…	nucleotide binding;catalytic activity;ubiquitin-protein ligase activity;binding;protein binding;ATP binding;transcription factor binding;ligase activity;ligase activity, forming carbon-nitrogen bonds;acid-amino acid ligase activity;purine nucleotide binding;small conjugating protein ligase activity;SUMO ligase activity;enzyme binding;protein domain specific binding;adenyl nucleotide binding;ribon…	synaptonemal complex;fibrillar center;nucleus;nucleoplasm;cytoplasm;nuclear body;PML body;dendrite;cell projection;neuron projection;organelle;membrane-bounded organelle;intracellular organelle;intracellular membrane-bounded organelle;organelle part;intracellular part;chromosomal part;nuclear part;intracellular organelle part;nucleoplasm part;nucleolar part;nuclear chromosome part;cell part;synap…	nuclear division;protein modification process;proteolysis;organelle organization;chromosome segregation;mitosis;metabolic process;catabolic process;cellular process;viral reproduction;cellular component organization;protein metabolic process;macromolecule metabolic process;macromolecule modification;cellular metabolic process;primary metabolic process;organelle fission;cell division;proteolysis i…	nucleus;nucleoplasm;cytoplasm;cell projection;neuron projection;organelle;intracellular organelle;intracellular membrane-bounded organelle;cell part;synapse;cytoplasm;cell part;cytoplasm;cell part
HSP90AB1	sp|P08238|HS90B_HUMAN	P08238	HS90B_HUMAN	Heat shock protein HSP 90-beta	724	1.04118	0.529941	27.9423	27.3829	27.299	27.2443	26.8028	26.9872	84	78	74	76	80	78	30	28	24	26	28	26	84	78	74	76	80	78	3497575420	2303241220	2346813440	2064895490	1392267140	1534488700		1	0.999	53	470	162	470	placenta development;regulation of cytokine-mediated signaling pathway;immune system process;regulation of immune system process;protein folding;chemotaxis;response to stress;defense response;immune response;response to unfolded protein;signal transduction;axon guidance;metabolic process;response to temperature stimulus;response to heat;response to external stimulus;response to abiotic stimulus;r…	nucleotide binding;nucleic acid binding;RNA binding;double-stranded RNA binding;antigen binding;binding;protein binding;ATP binding;purine nucleotide binding;enzyme binding;kinase binding;protein domain specific binding;MHC protein complex binding;MHC class II protein complex binding;enzyme regulator activity;nitric-oxide synthase regulator activity;adenyl nucleotide binding;TPR domain binding;ri…	nucleoplasm;cytoplasm;mitochondrion;cytosol;membrane;cytoplasmic membrane-bounded vesicle;cytoplasmic vesicle;vesicle;membrane-bounded vesicle;melanosome;organelle;membrane-bounded organelle;intracellular organelle;extracellular organelle;intracellular membrane-bounded organelle;extracellular region part;organelle part;intracellular part;nuclear part;cytoplasmic part;intracellular organelle part;…	immune system process;protein folding;response to stress;signal transduction;metabolic process;response to heat;response to external stimulus;response to abiotic stimulus;cellular process;protein metabolic process;developmental process;locomotion;response to chemical stimulus;macromolecule metabolic process;cellular metabolic process;primary metabolic process;anatomical structure development;resp…	nucleoplasm;cytoplasm;mitochondrion;cytosol;membrane;cytoplasmic membrane-bounded vesicle;vesicle;organelle;intracellular organelle;extracellular organelle;intracellular membrane-bounded organelle;cell part;mitochondrion;organelle;intracellular organelle;intracellular membrane-bounded organelle;cell part
HPRT1	sp|P00492|HPRT_HUMAN	P00492	HPRT_HUMAN	Hypoxanthine-guanine phosphoribosyltransferase	218	1.04041	0.629207	23.3679	22.5412	22.784	22.4687	21.9911	22.3457	9	6	6	5	6	5	9	6	6	5	6	5	9	6	6	5	6	5	38149712	19796742	22040184	16566840	11614924	12704270		1	0.999	8	37	37	37	cell activation;response to amphetamine;immune system process;alcohol metabolic process;nucleobase-containing compound metabolic process;purine base metabolic process;purine nucleotide metabolic process;purine nucleotide biosynthetic process;purine ribonucleoside salvage;adenine salvage;GMP biosynthetic process;guanine salvage;IMP biosynthetic process;purine nucleotide catabolic process;protein c…	nucleotide binding;magnesium ion binding;catalytic activity;hypoxanthine phosphoribosyltransferase activity;binding;protein binding;transferase activity;transferase activity, transferring glycosyl groups;transferase activity, transferring pentosyl groups;identical protein binding;protein homodimerization activity;ion binding;cation binding;metal ion binding;protein dimerization activity;guanine p…	cytoplasm;cytosol;vesicle;membrane-bounded vesicle;organelle;membrane-bounded organelle;extracellular organelle;extracellular region part;intracellular part;cytoplasmic part;cell part;extracellular membrane-bounded organelle;extracellular vesicular exosome;cytoplasm;intracellular part;cell part	cell activation;immune system process;alcohol metabolic process;nucleobase-containing compound metabolic process;protein complex assembly;cellular aromatic compound metabolic process;nitrogen compound metabolic process;behavior;metabolic process;cell death;cell proliferation;catabolic process;biosynthetic process;nucleoside metabolic process;nucleotide metabolic process;amine metabolic process;an…	cytoplasm;cytosol;vesicle;organelle;extracellular organelle;cell part;cytoplasm;cell part
AHCY	sp|P23526|SAHH_HUMAN	P23526	SAHH_HUMAN	Adenosylhomocysteinase	432	1.03686	0.519765	25.1485	24.9653	24.5946	24.5963	24.0472	24.5057	14	16	17	15	17	18	14	16	17	15	17	18	14	16	17	15	17	18	130854400	147803760	127389472	92665632	81405176	130495736		1	0.999	18	97	97	97	sulfur amino acid metabolic process;organic acid metabolic process;nucleobase-containing compound metabolic process;cellular amino acid metabolic process;cellular modified amino acid metabolic process;one-carbon metabolic process;coenzyme metabolic process;sulfur compound metabolic process;xenobiotic metabolic process;nitrogen compound metabolic process;metabolic process;nucleoside metabolic proc…	catalytic activity;adenosylhomocysteinase activity;hydrolase activity;hydrolase activity, acting on ether bonds;trialkylsulfonium hydrolase activity;catalytic activity;adenosylhomocysteinase activity;hydrolase activity;hydrolase activity, acting on ether bonds;trialkylsulfonium hydrolase activity	cytoplasm;cytosol;cytoplasmic membrane-bounded vesicle;cytoplasmic vesicle;vesicle;membrane-bounded vesicle;melanosome;organelle;membrane-bounded organelle;intracellular organelle;extracellular organelle;intracellular membrane-bounded organelle;extracellular region part;intracellular part;cytoplasmic part;cell part;pigment granule;extracellular membrane-bounded organelle;extracellular vesicular e…	organic acid metabolic process;nucleobase-containing compound metabolic process;cellular amino acid metabolic process;one-carbon metabolic process;sulfur compound metabolic process;xenobiotic metabolic process;nitrogen compound metabolic process;metabolic process;nucleoside metabolic process;amine metabolic process;cellular process;cellular nitrogen compound metabolic process;cellular ketone meta…	cytoplasm;cytosol;cytoplasmic membrane-bounded vesicle;vesicle;organelle;intracellular organelle;extracellular organelle;intracellular membrane-bounded organelle;cell part
GOLT1B	sp|Q9Y3E0|GOT1B_HUMAN	Q9Y3E0	GOT1B_HUMAN	Vesicle transport protein GOT1B	138	1.03679	2.81475	25.4535	NaN	22.4175	21.4372	20.9275	20.9976	7	0	2	2	3	2	7	0	2	2	3	2	7	0	2	2	3	2	103254528	0	9721873	4805535	3.34986e+06	3.61286e+06		1	0.999	4	16	16	16	lipid metabolic process;transport;signal transduction;metabolic process;regulation of signal transduction;positive regulation of signal transduction;cellular process;regulation of intracellular protein kinase cascade;regulation of cell communication;positive regulation of cell communication;positive regulation of intracellular protein kinase cascade;protein transport;vesicle-mediated transport;re…	catalytic activity;signal transducer activity;lipase activity;hydrolase activity;hydrolase activity, acting on ester bonds;molecular transducer activity	Golgi membrane;endoplasmic reticulum;membrane;integral to membrane;organelle membrane;intrinsic to membrane;organelle;membrane-bounded organelle;intracellular organelle;intracellular membrane-bounded organelle;organelle part;intracellular part;membrane part;Golgi apparatus part;cytoplasmic part;intracellular organelle part;cell part	lipid metabolic process;transport;signal transduction;metabolic process;cellular process;protein transport;vesicle-mediated transport;primary metabolic process;response to stimulus;establishment of localization;biological regulation;transport;cellular process;vesicle-mediated transport;establishment of localization;transport;cellular process;vesicle-mediated transport;establishment of localization	endoplasmic reticulum;membrane;organelle;intracellular organelle;intracellular membrane-bounded organelle;cell part
DDX5	sp|P17844|DDX5_HUMAN	P17844	DDX5_HUMAN	Probable ATP-dependent RNA helicase DDX5	614	1.03377	0.570704	25.1356	24.9468	24.6635	24.7686	24.0308	24.2344	23	23	27	23	19	18	16	17	19	16	13	12	23	23	27	25	20	18	184785504	160774032	144064560	166883680	106938824	98576416		1	0.999	25	133	93	136	negative regulation of transcription from RNA polymerase II promoter;RNA splicing, via transesterification reactions;RNA splicing, via transesterification reactions with bulged adenosine as nucleophile;regulation of alternative nuclear mRNA splicing, via spliceosome;nuclear mRNA splicing, via spliceosome;in utero embryonic development;nucleobase-containing compound metabolic process;transcription…	nucleotide binding;protein binding transcription factor activity;transcription factor binding transcription factor activity;nucleic acid binding;transcription cofactor activity;transcription coactivator activity;RNA binding;RNA helicase activity;catalytic activity;ATP-dependent RNA helicase activity;helicase activity;receptor binding;binding;protein binding;ATP binding;ATP-dependent helicase acti…	nucleus;nucleoplasm;spliceosomal complex;nucleolus;cytoplasm;membrane;ribonucleoprotein complex;vesicle;membrane-bounded vesicle;macromolecular complex;organelle;membrane-bounded organelle;non-membrane-bounded organelle;intracellular organelle;extracellular organelle;intracellular membrane-bounded organelle;intracellular non-membrane-bounded organelle;extracellular region part;organelle part;intr…	nucleobase-containing compound metabolic process;RNA processing;mRNA processing;nitrogen compound metabolic process;signal transduction;metabolic process;RNA splicing;biosynthetic process;embryo development;cellular process;cell growth;RNA metabolic process;mRNA metabolic process;developmental process;cellular nitrogen compound metabolic process;growth;macromolecule metabolic process;cellular met…	nucleus;nucleoplasm;spliceosomal complex;nucleolus;cytoplasm;membrane;ribonucleoprotein complex;vesicle;macromolecular complex;organelle;intracellular organelle;extracellular organelle;intracellular membrane-bounded organelle;intracellular non-membrane-bounded organelle;cell part;nucleoplasm;cell part;nucleus;organelle;intracellular organelle;intracellular membrane-bounded organelle;cell part;nuc…
S100A4	sp|P26447|S10A4_HUMAN	P26447	S10A4_HUMAN	Protein S100-A4	101	1.03338	0.820775	25.7864	24.6805	24.8193	24.5371	24.0906	24.1962	7	5	6	8	6	6	7	5	6	8	6	6	7	5	6	8	6	6	130991984	61924196	73088408	51474292	41726028	41631176		1	0.999	5	38	38	38	cell morphogenesis;cell morphogenesis involved in differentiation;epithelial to mesenchymal transition;anatomical structure morphogenesis;regulation of signal transduction;positive regulation of signal transduction;cellular process;regulation of intracellular protein kinase cascade;regulation of cell communication;positive regulation of cell communication;positive regulation of intracellular prot…	receptor binding;binding;calcium ion binding;protein binding;ion binding;cation binding;metal ion binding;RAGE receptor binding	extracellular space;nucleus;vesicle;membrane-bounded vesicle;cell projection;neuron projection;organelle;membrane-bounded organelle;intracellular organelle;extracellular organelle;intracellular membrane-bounded organelle;extracellular region part;intracellular part;cytoplasmic part;cell part;perinuclear region of cytoplasm;extracellular membrane-bounded organelle;extracellular vesicular exosome	cell morphogenesis;anatomical structure morphogenesis;cellular process;cellular component organization;developmental process;cellular component morphogenesis;biological regulation	extracellular space;nucleus;vesicle;cell projection;neuron projection;organelle;intracellular organelle;extracellular organelle;intracellular membrane-bounded organelle;cell part
HSPB1	sp|P04792|HSPB1_HUMAN	P04792	HSPB1_HUMAN	Heat shock protein beta-1	205	1.03106	1.03111	27.0614	25.6906	25.7747	25.4003	24.8677	25.1653	32	20	25	22	21	19	32	20	25	22	21	19	32	20	25	22	21	19	807675580	264405088	314487328	247178304	186904768	215741536		1	0.999	19	139	139	139	regulation of cytokine production;positive regulation of cytokine production;tissue homeostasis;retina homeostasis;regulation of protein phosphorylation;regulation of translation;regulation of translational initiation;negative regulation of protein kinase activity;cellular component movement;response to stress;response to unfolded protein;cell adhesion;signal transduction;cell surface receptor li…	enzyme inhibitor activity;protein kinase inhibitor activity;protein kinase C binding;binding;protein binding;protein kinase C inhibitor activity;kinase regulator activity;kinase inhibitor activity;protein kinase regulator activity;enzyme binding;kinase binding;protein kinase binding;enzyme regulator activity;protein serine/threonine kinase inhibitor activity;small conjugating protein binding;iden…	proteasome complex;extracellular space;nucleus;cytoplasm;spindle;cytosol;cytoskeleton;plasma membrane;adherens junction;cell-substrate adherens junction;focal adhesion;membrane;Z disc;cell junction;cell-substrate junction;vesicle;membrane-bounded vesicle;macromolecular complex;organelle;membrane-bounded organelle;non-membrane-bounded organelle;intracellular organelle;extracellular organelle;intra…	regulation of translation;cellular component movement;response to stress;cell adhesion;signal transduction;metabolic process;response to biotic stimulus;cellular process;biological adhesion;regulation of protein modification process;response to chemical stimulus;homeostatic process;macromolecule metabolic process;response to stimulus;multi-organism process;biological regulation	proteasome complex;extracellular space;nucleus;cytoplasm;cytosol;cytoskeleton;plasma membrane;membrane;vesicle;macromolecular complex;organelle;intracellular organelle;extracellular organelle;intracellular membrane-bounded organelle;intracellular non-membrane-bounded organelle;protein complex;cell part
SNRPD2	sp|P62316|SMD2_HUMAN	P62316	SMD2_HUMAN	Small nuclear ribonucleoprotein Sm D2	118	1.03101	0.567332	24.0618	23.6954	23.48	23.4992	22.8267	23.2094	6	6	6	7	6	4	6	6	6	7	6	4	6	6	6	7	6	4	52458628	38823632	32445828	34968692	18715888	21401252		1	0.999	6	35	35	35	spliceosome assembly;RNA splicing, via transesterification reactions;RNA splicing, via transesterification reactions with bulged adenosine as nucleophile;spliceosomal snRNP assembly;nuclear mRNA splicing, via spliceosome;nucleobase-containing compound metabolic process;RNA processing;mRNA processing;nitrogen compound metabolic process;metabolic process;RNA splicing;cellular process;gene expressio…		nucleoplasm;spliceosomal complex;U1 snRNP;U4 snRNP;U12-type spliceosomal complex;cytosol;ribonucleoprotein complex;small nuclear ribonucleoprotein complex;vesicle;membrane-bounded vesicle;macromolecular complex;methyltransferase complex;methylosome;pICln-Sm protein complex;SMN-Sm protein complex;organelle;membrane-bounded organelle;extracellular organelle;protein complex;extracellular region part…	nucleobase-containing compound metabolic process;RNA processing;mRNA processing;nitrogen compound metabolic process;metabolic process;RNA splicing;cellular process;cellular component organization;RNA metabolic process;mRNA metabolic process;cellular component assembly;ribonucleoprotein complex assembly;cellular macromolecular complex assembly;cellular nitrogen compound metabolic process;macromole…	nucleoplasm;spliceosomal complex;cytosol;ribonucleoprotein complex;small nuclear ribonucleoprotein complex;vesicle;macromolecular complex;organelle;extracellular organelle;protein complex;cell part;ribonucleoprotein complex;small nuclear ribonucleoprotein complex;macromolecular complex;cell part;ribonucleoprotein complex;small nuclear ribonucleoprotein complex;macromolecular complex;cell part
ACTB	sp|P60709|ACTB_HUMAN	P60709	ACTB_HUMAN	Actin, cytoplasmic 1	375	1.03066	0.719579	31.8759	31.2406	30.9159	30.9267	30.3488	30.5981	185	154	150	140	126	130	10	9	10	10	6	8	185	154	150	140	126	130	24696387600	17545965600	13407395800	14493205500	9670572000	12106181600		1	0.999	32	885	53	885	tissue homeostasis;retina homeostasis;immune system process;chromatin organization;chromatin remodeling;protein folding;'de novo' protein folding;cellular component movement;chemotaxis;response to stress;defense response;immune response;organelle organization;cell adhesion;signal transduction;cell surface receptor linked signaling pathway;enzyme linked receptor protein signaling pathway;transmemb…	nucleotide binding;structural molecule activity;structural constituent of cytoskeleton;binding;protein binding;ATP binding;cytoskeletal protein binding;transcription factor binding;purine nucleotide binding;kinesin binding;enzyme binding;adenyl nucleotide binding;Tat protein binding;ribonucleotide binding;purine ribonucleotide binding;adenyl ribonucleotide binding;purine ribonucleoside triphospha…	histone acetyltransferase complex;chromatin;nuclear chromatin;extracellular space;nucleoplasm;cytoplasm;cytosol;cytoskeleton;plasma membrane;adherens junction;cell-substrate adherens junction;focal adhesion;postsynaptic density;membrane;cell junction;cell-substrate junction;axon;ribonucleoprotein complex;cortical cytoskeleton;vesicle;membrane-bounded vesicle;macromolecular complex;methyltransfera…	immune system process;chromatin organization;protein folding;cellular component movement;response to stress;organelle organization;cell adhesion;signal transduction;metabolic process;response to external stimulus;cellular process;cellular component organization;chromatin modification;protein metabolic process;cellular component assembly;biological adhesion;multicellular organismal process;develop…	extracellular space;nucleoplasm;cytoplasm;cytosol;cytoskeleton;plasma membrane;membrane;ribonucleoprotein complex;vesicle;macromolecular complex;histone methyltransferase complex;cell projection;neuron projection;organelle;intracellular organelle;extracellular organelle;intracellular non-membrane-bounded organelle;protein complex;cell part
MIF	sp|P14174|MIF_HUMAN	P14174	MIF_HUMAN	Macrophage migration inhibitory factor	115	1.03006	0.953767	26.4581	25.2658	25.1701	24.6337	24.4742	24.9248	6	5	7	4	7	5	6	5	7	4	7	5	6	5	7	4	7	5	196920192	84119352	74677816	24649266	46606684	54716660		1	0.999	3	34	34	34	prostaglandin biosynthetic process;regulation of cytokine production;positive regulation of cytokine production;regulation of protein phosphorylation;positive regulation of protein phosphorylation;immune system process;regulation of immune system process;positive regulation of immune system process;regulation of leukocyte activation;positive regulation of leukocyte activation;regulation of immune…	catalytic activity;dopachrome isomerase activity;receptor binding;cytokine activity;cytokine receptor binding;binding;protein binding;isomerase activity;intramolecular oxidoreductase activity;intramolecular oxidoreductase activity, interconverting keto- and enol-groups;intramolecular oxidoreductase activity, transposing C=C bonds;chemoattractant activity;phenylpyruvate tautomerase activity	extracellular region;extracellular space;nucleoplasm;cytoplasm;cell surface;vesicle;membrane-bounded vesicle;organelle;membrane-bounded organelle;extracellular organelle;extracellular region part;organelle part;intracellular part;nuclear part;intracellular organelle part;cell part;extracellular membrane-bounded organelle;extracellular vesicular exosome	immune system process;organic acid metabolic process;protein complex assembly;lipid metabolic process;response to stress;response to DNA damage stimulus;signal transduction;aging;metabolic process;cell proliferation;biosynthetic process;response to external stimulus;cellular process;cellular component organization;cellular component assembly;regulation of protein modification process;developmenta…	extracellular region;extracellular space;nucleoplasm;cytoplasm;cell surface;vesicle;organelle;extracellular organelle;cell part
PSMA7	sp|O14818|PSA7_HUMAN	O14818	PSA7_HUMAN	Proteasome subunit alpha type-7	248	1.02583	0.739143	24.9473	24.0484	24.0374	23.7903	23.3007	23.7248	11	9	10	8	7	7	6	6	6	4	4	4	11	9	10	8	7	7	128306448	58119740	70097472	52502076	36234396	45884092		1	0.999	11	52	30	52	G1/S transition of mitotic cell cycle;protein polyubiquitination;mitotic cell cycle;activation of innate immune response;innate immune response activating cell surface receptor signaling pathway;stimulatory C-type lectin receptor signaling pathway;activation of immune response;immune system process;immune response-activating cell surface receptor signaling pathway;antigen processing and presentat…	catalytic activity;endopeptidase activity;threonine-type endopeptidase activity;binding;protein binding;peptidase activity;hydrolase activity;identical protein binding;threonine-type peptidase activity;peptidase activity, acting on L-amino acid peptides;catalytic activity;endopeptidase activity;threonine-type endopeptidase activity;peptidase activity;hydrolase activity;threonine-type peptidase ac…	proteasome complex;nucleus;nucleoplasm;cytoplasm;cytosol;proteasome core complex;proteasome core complex, alpha-subunit complex;vesicle;membrane-bounded vesicle;macromolecular complex;organelle;membrane-bounded organelle;intracellular organelle;extracellular organelle;intracellular membrane-bounded organelle;protein complex;extracellular region part;organelle part;intracellular part;nuclear part;…	mitotic cell cycle;immune system process;protein modification process;proteolysis;nitrogen compound metabolic process;response to stress;response to DNA damage stimulus;cell cycle;signal transduction;metabolic process;cell death;catabolic process;cellular process;viral reproduction;death;protein metabolic process;regulation of protein modification process;cellular nitrogen compound metabolic proc…	proteasome complex;nucleus;nucleoplasm;cytoplasm;cytosol;vesicle;macromolecular complex;organelle;intracellular organelle;extracellular organelle;intracellular membrane-bounded organelle;protein complex;cell part;macromolecular complex;protein complex;cell part;nucleus;cytoplasm;macromolecular complex;organelle;intracellular organelle;intracellular membrane-bounded organelle;protein complex;cell …
CHORDC1	sp|Q9UHD1|CHRD1_HUMAN	Q9UHD1	CHRD1_HUMAN	Cysteine and histidine-rich domain-containing protein 1	332	1.02453	0.391327	23.2351	22.9006	22.7689	22.7922	22.4065	22.5319	6	7	4	6	6	7	6	7	4	6	6	7	6	7	4	6	6	7	19777460	39276188	13094245	15680438	15706335	23400610		1	0.999	7	36	36	36	regulation of protein phosphorylation;protein folding;negative regulation of protein kinase activity;metabolic process;cellular process;regulation of cell cycle process;regulation of centrosome duplication;regulation of phosphate metabolic process;regulation of metabolic process;protein metabolic process;regulation of cellular metabolic process;regulation of protein modification process;regulatio…	binding;protein binding;zinc ion binding;heat shock protein binding;ion binding;cation binding;metal ion binding;transition metal ion binding;Hsp90 protein binding		protein folding;metabolic process;cellular process;protein metabolic process;regulation of protein modification process;regulation of organelle organization;macromolecule metabolic process;cellular metabolic process;primary metabolic process;regulation of cell cycle;biological regulation
FUS	sp|P35637|FUS_HUMAN	P35637	FUS_HUMAN	RNA-binding protein FUS	526	1.02197	0.70861	24.0391	22.9583	23.2735	22.8102	22.6209	22.7139	6	2	3	3	2	3	4	1	2	2	1	2	6	2	3	3	2	3	42111080	13430611	18980580	13952634	10839554	13075441		1	0.999	6	19	12	19	RNA splicing, via transesterification reactions;RNA splicing, via transesterification reactions with bulged adenosine as nucleophile;nuclear mRNA splicing, via spliceosome;nucleobase-containing compound metabolic process;RNA processing;mRNA processing;nitrogen compound metabolic process;metabolic process;RNA splicing;cellular process;gene expression;RNA metabolic process;mRNA metabolic process;ce…	nucleotide binding;protein binding transcription factor activity;transcription factor binding transcription factor activity;nucleic acid binding;DNA binding;transcription cofactor activity;transcription coactivator activity;RNA binding;binding;protein binding;zinc ion binding;identical protein binding;ion binding;cation binding;metal ion binding;transition metal ion binding;nucleotide binding;nuc…	nucleus;nucleoplasm;cytoplasm;organelle;membrane-bounded organelle;intracellular organelle;intracellular membrane-bounded organelle;organelle part;intracellular part;nuclear part;intracellular organelle part;cell part;nucleoplasm;organelle part;intracellular part;nuclear part;intracellular organelle part;cell part;nucleoplasm;cytoplasm;organelle part;intracellular part;nuclear part;intracellular …	nucleobase-containing compound metabolic process;RNA processing;mRNA processing;nitrogen compound metabolic process;metabolic process;RNA splicing;cellular process;RNA metabolic process;mRNA metabolic process;cellular nitrogen compound metabolic process;macromolecule metabolic process;cellular metabolic process;primary metabolic process	nucleus;nucleoplasm;cytoplasm;organelle;intracellular organelle;intracellular membrane-bounded organelle;cell part;nucleoplasm;cell part;nucleoplasm;cytoplasm;cell part;nucleoplasm;cell part
G6PD	sp|P11413|G6PD_HUMAN	P11413	G6PD_HUMAN	Glucose-6-phosphate 1-dehydrogenase	515	1.02164	0.483289	25.6212	25.3554	25.1154	25.135	24.5654	24.9418	34	35	29	38	29	33	34	35	29	38	29	33	34	35	29	38	29	33	337802496	275743424	221991792	272354496	176898416	212890128		1	0.999	32	198	198	198	cytokine production;carbohydrate metabolic process;monosaccharide metabolic process;glucose metabolic process;glucose catabolic process;D-ribose metabolic process;alcohol metabolic process;organic acid metabolic process;pentose-phosphate shunt;nucleobase-containing compound metabolic process;transcription initiation, DNA-dependent;transcription initiation from RNA polymerase II promoter;peptide m…	nucleotide binding;catalytic activity;glucose-6-phosphate dehydrogenase activity;binding;protein binding;sugar binding;glucose binding;oxidoreductase activity;oxidoreductase activity, acting on CH-OH group of donors;oxidoreductase activity, acting on the CH-OH group of donors, NAD or NADP as acceptor;carbohydrate binding;identical protein binding;protein homodimerization activity;protein dimeriza…	nucleus;cytoplasm;centrosome;microtubule organizing center;cytosol;internal side of plasma membrane;membrane;vesicle;membrane-bounded vesicle;organelle;membrane-bounded organelle;non-membrane-bounded organelle;intracellular organelle;extracellular organelle;intracellular membrane-bounded organelle;intracellular non-membrane-bounded organelle;extracellular region part;organelle part;intracellular …	cytokine production;carbohydrate metabolic process;alcohol metabolic process;organic acid metabolic process;nucleobase-containing compound metabolic process;transcription initiation, DNA-dependent;peptide metabolic process;cellular amino acid metabolic process;lipid metabolic process;sulfur compound metabolic process;nitrogen compound metabolic process;response to stress;response to oxidative str…	nucleus;cytoplasm;centrosome;microtubule organizing center;cytosol;membrane;vesicle;organelle;intracellular organelle;extracellular organelle;intracellular membrane-bounded organelle;intracellular non-membrane-bounded organelle;cell part;cytoplasm;microtubule organizing center;cell part;cytoplasm;microtubule organizing center;cell part;cytoplasm;microtubule organizing center;cell part
ACTR3	sp|P61158|ARP3_HUMAN	P61158	ARP3_HUMAN	Actin-related protein 3	418	1.02055	0.532735	24.2338	23.7685	23.6799	23.7107	23.178	23.1953	13	8	8	11	9	12	9	6	6	8	7	9	13	8	8	11	9	12	76854544	39589948	43951272	37702068	25696618	34129416		1	0.999	14	61	45	61	cytokinesis;immune system process;cellular component movement;chemotaxis;response to stress;defense response;immune response;organelle organization;cytoskeleton organization;actin filament organization;microtubule-based process;microtubule-based movement;establishment or maintenance of cell polarity;signal transduction;cell surface receptor linked signaling pathway;enzyme linked receptor protein …	nucleotide binding;structural molecule activity;structural constituent of cytoskeleton;binding;ATP binding;purine nucleotide binding;adenyl nucleotide binding;ribonucleotide binding;purine ribonucleotide binding;adenyl ribonucleotide binding;purine ribonucleoside triphosphate binding;nucleotide binding;binding;ATP binding;purine nucleotide binding;adenyl nucleotide binding;ribonucleotide binding;…	Golgi membrane;podosome;cytosol;cytoskeleton;actin filament;Arp2/3 protein complex;cell-cell junction;adherens junction;cell-substrate adherens junction;focal adhesion;actin cytoskeleton;membrane;lamellipodium;cell junction;cell-substrate junction;hemidesmosome;organelle membrane;vesicle;membrane-bounded vesicle;macromolecular complex;cell projection;organelle;membrane-bounded organelle;non-membr…	cytokinesis;immune system process;cellular component movement;response to stress;organelle organization;cytoskeleton organization;establishment or maintenance of cell polarity;signal transduction;response to external stimulus;anatomical structure morphogenesis;cellular process;cellular component organization;developmental process;cellular component morphogenesis;regulation of organelle organizati…	cytosol;cytoskeleton;membrane;vesicle;macromolecular complex;cell projection;organelle;intracellular organelle;extracellular organelle;intracellular non-membrane-bounded organelle;protein complex;cell part;synapse;macromolecular complex;protein complex;cell part;macromolecular complex;protein complex;cell part;macromolecular complex;protein complex;cell part;macromolecular complex;protein complex…
PLOD2	sp|O00469|PLOD2_HUMAN	O00469	PLOD2_HUMAN	Procollagen-lysine,2-oxoglutarate 5-dioxygenase 2	737	1.0187	0.496146	23.0271	22.6027	22.3479	22.3865	22.0111	22.0917	10	7	6	6	6	5	10	7	6	6	6	5	10	7	6	6	6	5	40965888	15262159	16062397	10009429	13727387	13712625		1	0.999	10	40	40	40	response to hypoxia;protein modification process;response to stress;metabolic process;cellular process;cellular component organization;protein metabolic process;extracellular matrix organization;response to chemical stimulus;extracellular structure organization;macromolecule metabolic process;macromolecule modification;cellular metabolic process;primary metabolic process;cellular macromolecule me…	catalytic activity;binding;iron ion binding;procollagen-lysine 5-dioxygenase activity;oxidoreductase activity;oxidoreductase activity, acting on paired donors, with incorporation or reduction of molecular oxygen;oxidoreductase activity, acting on paired donors, with incorporation or reduction of molecular oxygen, 2-oxoglutarate as one donor, and incorporation of one atom each of oxygen into both …	endoplasmic reticulum;endoplasmic reticulum membrane;membrane;rough endoplasmic reticulum membrane;organelle membrane;vesicle;membrane-bounded vesicle;organelle;membrane-bounded organelle;intracellular organelle;extracellular organelle;intracellular membrane-bounded organelle;extracellular region part;organelle part;intracellular part;membrane part;endoplasmic reticulum part;cytoplasmic part;intr…	protein modification process;response to stress;metabolic process;cellular process;cellular component organization;protein metabolic process;extracellular matrix organization;response to chemical stimulus;extracellular structure organization;macromolecule metabolic process;macromolecule modification;cellular metabolic process;primary metabolic process;response to stimulus	endoplasmic reticulum;membrane;vesicle;organelle;intracellular organelle;extracellular organelle;intracellular membrane-bounded organelle;cell part;endoplasmic reticulum;organelle;intracellular organelle;intracellular membrane-bounded organelle;cell part;endoplasmic reticulum;organelle;intracellular organelle;intracellular membrane-bounded organelle;cell part
POR	sp|P16435|NCPR_HUMAN	P16435	NCPR_HUMAN	NADPH--cytochrome P450 reductase	677	1.01558	1.82731	25.7328	22.8448	23.9343	22.4022	22.2151	22.4127	39	3	18	5	5	6	39	3	18	5	5	6	39	3	18	5	5	6	294469472	11779625	74553184	10515300	9270362	16162139		1	0.999	28	76	76	76	regulation of growth plate cartilage chondrocyte proliferation;organic acid metabolic process;protein modification process;protein acetylation;internal protein amino acid acetylation;cellular amino acid metabolic process;betaine metabolic process;lipid metabolic process;fatty acid metabolic process;cellular aromatic compound metabolic process;one-carbon metabolic process;nitrogen compound metabol…	nucleotide binding;catalytic activity;NADPH-hemoprotein reductase activity;cytochrome-b5 reductase activity;binding;iron ion binding;nitric oxide dioxygenase activity;electron carrier activity;FMN binding;oxidoreductase activity;oxidoreductase activity, acting on NADH or NADPH;oxidoreductase activity, acting on NADH or NADPH, heme protein as acceptor;oxidoreductase activity, acting on a heme grou…	mitochondrion;endoplasmic reticulum membrane;membrane;organelle membrane;organelle;membrane-bounded organelle;intracellular organelle;intracellular membrane-bounded organelle;organelle part;intracellular part;membrane part;endoplasmic reticulum part;cytoplasmic part;intracellular organelle part;cell part;cytosol;intracellular part;cytoplasmic part;cell part	organic acid metabolic process;protein modification process;cellular amino acid metabolic process;lipid metabolic process;cellular aromatic compound metabolic process;one-carbon metabolic process;nitrogen compound metabolic process;metabolic process;catabolic process;amine metabolic process;response to external stimulus;response to endogenous stimulus;cellular process;response to extracellular st…	mitochondrion;membrane;organelle;intracellular organelle;intracellular membrane-bounded organelle;cell part;cytosol;cell part
WDR1	sp|O75083|WDR1_HUMAN	O75083	WDR1_HUMAN	WD repeat-containing protein 1	606	1.01452	0.392618	24.2037	24.3249	23.999	23.9929	23.4813	23.8756	15	19	17	18	15	17	15	19	17	18	15	17	15	19	17	18	15	17	128066952	153660112	95766416	106192264	65252772	82674256		1	0.999	20	101	101	101	cell activation;platelet degranulation;system process;transport;exocytosis;blood coagulation;hemostasis;sensory perception;sensory perception of sound;cellular process;regulation of gliogenesis;vesicle-mediated transport;platelet activation;multicellular organismal process;secretion by cell;regulation of cell differentiation;regulation of glial cell differentiation;secretion;regulation of oligode…		podosome;extracellular region;cytoplasm;cytosol;actin filament;cell junction;vesicle;membrane-bounded vesicle;macromolecular complex;cell projection;organelle;membrane-bounded organelle;non-membrane-bounded organelle;intracellular organelle;extracellular organelle;intracellular non-membrane-bounded organelle;protein complex;extracellular region part;organelle part;intracellular part;cytoskeletal …	cell activation;transport;exocytosis;cellular process;vesicle-mediated transport;multicellular organismal process;secretion;coagulation;neurological system process;regulation of body fluid levels;establishment of localization;biological regulation	extracellular region;cytoplasm;cytosol;vesicle;macromolecular complex;cell projection;organelle;intracellular organelle;extracellular organelle;intracellular non-membrane-bounded organelle;protein complex;cell part;cytoplasm;cell part
TXNRD1	sp|Q16881|TRXR1_HUMAN	Q16881	TRXR1_HUMAN	Thioredoxin reductase 1, cytoplasmic	649	1.01305	0.35158	24.4709	24.3438	24.1449	24.2066	23.7492	23.949	23	23	22	25	20	20	23	23	22	24	20	20	23	23	22	25	20	20	168244352	117890416	112960056	133967608	80449688	113800240		1	0.999	20	133	132	133	response to reactive oxygen species;formation of primary germ layer;mesoderm formation;nucleobase-containing compound metabolic process;transcription initiation, DNA-dependent;transcription initiation from RNA polymerase II promoter;lipid metabolic process;nitrogen compound metabolic process;response to stress;response to oxidative stress;signal transduction;metabolic process;cell proliferation;b…	catalytic activity;thioredoxin-disulfide reductase activity;binding;electron carrier activity;protein disulfide oxidoreductase activity;disulfide oxidoreductase activity;antioxidant activity;oxidoreductase activity;oxidoreductase activity, acting on NADH or NADPH;oxidoreductase activity, acting on a sulfur group of donors;oxidoreductase activity, acting on a sulfur group of donors, NAD or NADP as…	nucleoplasm;nucleolus;mitochondrion;cytosol;vesicle;membrane-bounded vesicle;organelle;membrane-bounded organelle;non-membrane-bounded organelle;intracellular organelle;extracellular organelle;intracellular membrane-bounded organelle;intracellular non-membrane-bounded organelle;extracellular region part;organelle part;intracellular part;nuclear part;cytoplasmic part;intracellular organelle part;c…	nucleobase-containing compound metabolic process;transcription initiation, DNA-dependent;lipid metabolic process;nitrogen compound metabolic process;response to stress;response to oxidative stress;signal transduction;metabolic process;cell proliferation;biosynthetic process;cellular process;nucleobase-containing small molecule interconversion;RNA metabolic process;cellular homeostasis;development…	nucleoplasm;nucleolus;mitochondrion;cytosol;vesicle;organelle;intracellular organelle;extracellular organelle;intracellular membrane-bounded organelle;intracellular non-membrane-bounded organelle;cell part;nucleoplasm;nucleolus;organelle;intracellular organelle;intracellular non-membrane-bounded organelle;cell part;nucleoplasm;nucleolus;organelle;intracellular organelle;intracellular non-membrane…
ERH	sp|P84090|ERH_HUMAN	P84090	ERH_HUMAN	Enhancer of rudimentary homolog	104	1.01033	0.796591	25.2259	24.5819	24.4411	24.5051	23.5936	23.7604	2	2	3	2	2	2	2	2	3	2	2	2	2	2	3	2	2	2	46144800	32169164	27604544	28582840	16567480	17681782		1	0.999	2	13	13	13	osteoblast differentiation;nucleobase-containing compound metabolic process;pyrimidine nucleoside metabolic process;pyrimidine nucleotide metabolic process;pyrimidine nucleotide biosynthetic process;nucleoside phosphate metabolic process;nitrogen compound metabolic process;cell cycle;metabolic process;regulation of Notch signaling pathway;biosynthetic process;nucleoside metabolic process;nucleoti…		membrane;midbody;cell part;membrane;cell part	nucleobase-containing compound metabolic process;nitrogen compound metabolic process;cell cycle;metabolic process;biosynthetic process;nucleoside metabolic process;nucleotide metabolic process;cellular process;cell differentiation;developmental process;cellular nitrogen compound metabolic process;cellular metabolic process;primary metabolic process;small molecule metabolic process;heterocycle met…	membrane;midbody;cell part;membrane;cell part
TXN	sp|P10599|THIO_HUMAN	P10599	THIO_HUMAN	Thioredoxin	105	1.00995	0.899811	26.2249	25.04	25.1015	24.7489	24.2324	24.6857	7	4	5	5	4	5	7	4	5	5	4	5	7	4	5	5	4	5	202990976	77894008	89921696	71596520	41334428	60948704		1	0.999	6	30	30	30	sulfate assimilation;negative regulation of transcription from RNA polymerase II promoter;response to reactive oxygen species;regulation of protein phosphorylation;positive regulation of protein phosphorylation;immune system process;nucleobase-containing compound metabolic process;transcription initiation, DNA-dependent;regulation of transcription, DNA-dependent;regulation of transcription from R…	catalytic activity;protein disulfide oxidoreductase activity;disulfide oxidoreductase activity;peptide disulfide oxidoreductase activity;oxidoreductase activity;oxidoreductase activity, acting on a sulfur group of donors;oxidoreductase activity, acting on a sulfur group of donors, disulfide as acceptor;catalytic activity;protein disulfide oxidoreductase activity;disulfide oxidoreductase activity;…	nucleus;nucleoplasm;cytoplasm;mitochondrion;cytosol;vesicle;membrane-bounded vesicle;organelle;membrane-bounded organelle;intracellular organelle;extracellular organelle;intracellular membrane-bounded organelle;extracellular region part;organelle part;intracellular part;nuclear part;cytoplasmic part;intracellular organelle part;cell part;extracellular membrane-bounded organelle;extracellular vesi…	immune system process;nucleobase-containing compound metabolic process;transcription initiation, DNA-dependent;protein folding;glycerol ether metabolic process;sulfur compound metabolic process;nitrogen compound metabolic process;cellular component movement;response to stress;response to oxidative stress;cell communication;signal transduction;cell-cell signaling;metabolic process;cell proliferati…	nucleus;nucleoplasm;cytoplasm;mitochondrion;cytosol;vesicle;organelle;intracellular organelle;extracellular organelle;intracellular membrane-bounded organelle;cell part;nucleus;cytoplasm;mitochondrion;cytosol;organelle;intracellular organelle;intracellular membrane-bounded organelle;cell part
PSMB2	sp|P49721|PSB2_HUMAN	P49721	PSB2_HUMAN	Proteasome subunit beta type-2	201	1.00846	0.93048	24.1142	23.2165	22.8689	22.8707	22.0995	22.438	7	7	5	3	4	5	7	7	5	3	4	5	7	7	5	3	4	5	29879598	16602792	13454282	9825404	6.47021e+06	10533598		1	0.999	7	31	31	31	G1/S transition of mitotic cell cycle;protein polyubiquitination;mitotic cell cycle;activation of innate immune response;innate immune response activating cell surface receptor signaling pathway;stimulatory C-type lectin receptor signaling pathway;activation of immune response;immune system process;immune response-activating cell surface receptor signaling pathway;antigen processing and presentat…	catalytic activity;endopeptidase activity;threonine-type endopeptidase activity;peptidase activity;hydrolase activity;threonine-type peptidase activity;peptidase activity, acting on L-amino acid peptides;catalytic activity;endopeptidase activity;threonine-type endopeptidase activity;peptidase activity;hydrolase activity;threonine-type peptidase activity;peptidase activity, acting on L-amino acid …	proteasome complex;nucleus;nucleoplasm;cytoplasm;cytosol;proteasome core complex;membrane;vesicle;membrane-bounded vesicle;macromolecular complex;organelle;membrane-bounded organelle;intracellular organelle;extracellular organelle;intracellular membrane-bounded organelle;protein complex;extracellular region part;organelle part;intracellular part;nuclear part;cytoplasmic part;intracellular organel…	mitotic cell cycle;immune system process;protein modification process;proteolysis;nitrogen compound metabolic process;response to stress;response to DNA damage stimulus;cell cycle;signal transduction;metabolic process;cell death;catabolic process;response to endogenous stimulus;cellular process;viral reproduction;death;protein metabolic process;regulation of protein modification process;cellular …	proteasome complex;nucleus;nucleoplasm;cytoplasm;cytosol;membrane;vesicle;macromolecular complex;organelle;intracellular organelle;extracellular organelle;intracellular membrane-bounded organelle;protein complex;cell part;macromolecular complex;protein complex;cell part;macromolecular complex;protein complex;cell part
LGALS3	sp|P17931|LEG3_HUMAN	P17931	LEG3_HUMAN	Galectin-3	250	1.00584	0.766139	23.8875	23.0109	23.1462	23.0203	22.2352	22.4906	6	3	5	3	4	2	6	3	5	3	4	2	6	3	5	3	4	2	47078996	22901668	26486088	22993024	14597570	11088270		1	0.999	5	23	23	23	skeletal system development;immune system process;monocyte chemotaxis;regulation of immune system process;negative regulation of immune system process;positive regulation of immune system process;regulation of leukocyte migration;positive regulation of leukocyte migration;regulation of leukocyte activation;nucleobase-containing compound metabolic process;RNA processing;mRNA processing;nitrogen co…	binding;protein binding;IgE binding;immunoglobulin binding;carbohydrate binding;protein complex binding;chemoattractant activity;laminin binding;extracellular matrix binding;binding;carbohydrate binding;binding;carbohydrate binding;binding;carbohydrate binding	immunological synapse;proteinaceous extracellular matrix;extracellular space;nucleus;spliceosomal complex;cytoplasm;mitochondrial inner membrane;plasma membrane;external side of plasma membrane;membrane;organelle inner membrane;ribonucleoprotein complex;extracellular matrix;organelle membrane;mitochondrial membrane;vesicle;membrane-bounded vesicle;macromolecular complex;organelle;membrane-bounded…	immune system process;nucleobase-containing compound metabolic process;RNA processing;mRNA processing;nitrogen compound metabolic process;cellular component movement;response to stress;metabolic process;RNA splicing;response to external stimulus;cellular process;cellular component organization;RNA metabolic process;mRNA metabolic process;cell differentiation;extracellular matrix organization;deve…	proteinaceous extracellular matrix;extracellular space;nucleus;spliceosomal complex;cytoplasm;plasma membrane;membrane;ribonucleoprotein complex;extracellular matrix;vesicle;macromolecular complex;organelle;intracellular organelle;extracellular organelle;intracellular membrane-bounded organelle;cell part
TMEM165	sp|Q9HC07|TM165_HUMAN	Q9HC07	TM165_HUMAN	Putative divalent cation/proton antiporter TMEM165	324	1.00372	1.23142	25.1912	NaN	24.1494	23.9344	23.0083	23.3739	3	1	2	3	2	2	3	1	2	3	2	2	3	1	2	3	2	2	59210916	9014470	27539906	23565666	11702603	15565432		1	0.999	3	13	13	13	carbohydrate metabolic process;protein modification process;protein glycosylation;protein N-linked glycosylation;transport;ion transport;cation transport;calcium ion transport;cellular ion homeostasis;cellular calcium ion homeostasis;cellular metal ion homeostasis;regulation of pH;metabolic process;cellular process;protein metabolic process;cellular homeostasis;metal ion transport;cellular cation…		Golgi membrane;lysosomal membrane;vacuolar membrane;Golgi apparatus;endosome membrane;membrane;integral to membrane;organelle membrane;intrinsic to membrane;early endosome membrane;late endosome membrane;trans-Golgi network membrane;organelle;membrane-bounded organelle;intracellular organelle;intracellular membrane-bounded organelle;organelle part;intracellular part;membrane part;Golgi apparatus …	carbohydrate metabolic process;protein modification process;protein glycosylation;transport;ion transport;cellular ion homeostasis;metabolic process;cellular process;protein metabolic process;cellular homeostasis;homeostatic process;macromolecule metabolic process;macromolecule modification;cellular metabolic process;primary metabolic process;establishment of localization;biological regulation	Golgi apparatus;membrane;organelle;intracellular organelle;intracellular membrane-bounded organelle;cell part;membrane;cell part;membrane;cell part;membrane;cell part
MCM2	sp|P49736|MCM2_HUMAN	P49736	MCM2_HUMAN	DNA replication licensing factor MCM2	904	0.992468	0.552655	23.9636	23.7901	23.3122	23.4304	22.8283	23.1492	15	16	9	13	12	10	15	16	9	13	12	10	15	16	9	13	12	10	69175576	52159436	29791544	35332012	20005240	24449222		1	0.999	19	75	75	75	G1/S transition of mitotic cell cycle;mitotic cell cycle;nucleobase-containing compound metabolic process;DNA metabolic process;DNA replication;DNA unwinding involved in replication;DNA-dependent DNA replication initiation;DNA strand elongation involved in DNA replication;chromatin organization;nucleosome assembly;nitrogen compound metabolic process;organelle organization;cell cycle;metabolic pro…	nucleotide binding;nucleic acid binding;DNA binding;DNA helicase activity;DNA replication origin binding;catalytic activity;helicase activity;binding;ATP binding;pyrophosphatase activity;hydrolase activity;hydrolase activity, acting on acid anhydrides;hydrolase activity, acting on acid anhydrides, in phosphorus-containing anhydrides;purine nucleotide binding;nucleoside-triphosphatase activity;ade…	chromatin;origin recognition complex;nucleus;nucleoplasm;nuclear origin of replication recognition complex;cytoplasm;cytoskeleton;microtubule cytoskeleton;macromolecular complex;MCM complex;organelle;membrane-bounded organelle;non-membrane-bounded organelle;intracellular organelle;intracellular membrane-bounded organelle;intracellular non-membrane-bounded organelle;protein complex;organelle part;…	mitotic cell cycle;nucleobase-containing compound metabolic process;DNA metabolic process;DNA replication;chromatin organization;nitrogen compound metabolic process;organelle organization;cell cycle;metabolic process;biosynthetic process;cellular process;cellular component organization;cellular component assembly;DNA geometric change;cellular macromolecular complex assembly;cellular nitrogen comp…	origin recognition complex;nucleus;nucleoplasm;cytoplasm;cytoskeleton;macromolecular complex;organelle;intracellular organelle;intracellular membrane-bounded organelle;intracellular non-membrane-bounded organelle;protein complex;cell part;nucleus;macromolecular complex;organelle;intracellular organelle;intracellular membrane-bounded organelle;protein complex;cell part;nucleus;macromolecular compl…
ALDH7A1	sp|P49419|AL7A1_HUMAN	P49419	AL7A1_HUMAN	Alpha-aminoadipic semialdehyde dehydrogenase	539	0.991983	0.512243	22.0382	21.7003	21.8642	21.7594	20.9955	21.3111	5	6	5	6	4	6	5	6	5	6	4	6	5	6	5	6	4	6	11516832	7609528	10388327	10176930	7062220	11404402		1	0.9989	9	32	32	32	system process;alcohol metabolic process;cellular aldehyde metabolic process;organic acid metabolic process;cellular amino acid metabolic process;lysine metabolic process;lysine catabolic process;cellular modified amino acid metabolic process;cellular biogenic amine metabolic process;betaine metabolic process;betaine biosynthetic process;nitrogen compound metabolic process;sensory perception;sens…	catalytic activity;aldehyde dehydrogenase (NAD) activity;L-aminoadipate-semialdehyde dehydrogenase activity;betaine-aldehyde dehydrogenase activity;oxidoreductase activity;oxidoreductase activity, acting on the aldehyde or oxo group of donors, NAD or NADP as acceptor;oxidoreductase activity, acting on the aldehyde or oxo group of donors;catalytic activity;oxidoreductase activity;oxidoreductase ac…	nucleus;cytoplasm;mitochondrion;mitochondrial matrix;cytosol;membrane-enclosed lumen;vesicle;membrane-bounded vesicle;organelle;membrane-bounded organelle;intracellular organelle;extracellular organelle;intracellular membrane-bounded organelle;organelle lumen;extracellular region part;organelle part;intracellular part;mitochondrial part;cytoplasmic part;intracellular organelle part;cell part;extr…	alcohol metabolic process;cellular aldehyde metabolic process;organic acid metabolic process;cellular amino acid metabolic process;nitrogen compound metabolic process;metabolic process;catabolic process;biosynthetic process;amine metabolic process;cellular process;multicellular organismal process;cellular nitrogen compound metabolic process;cellular ketone metabolic process;cellular metabolic pro…	nucleus;cytoplasm;mitochondrion;cytosol;vesicle;organelle;intracellular organelle;extracellular organelle;intracellular membrane-bounded organelle;cell part
AKR1B1	sp|P15121|ALDR_HUMAN	P15121	ALDR_HUMAN	Aldo-keto reductase family 1 member B1	316	0.985755	0.435817	24.3181	23.9651	23.8276	23.8388	23.3323	23.6322	21	12	11	15	12	10	18	9	8	13	10	9	21	12	11	15	12	10	149869552	80927240	78913600	94421664	61735524	69046888		1	0.999	16	81	67	81	carbohydrate metabolic process;monosaccharide metabolic process;fructose metabolic process;alcohol metabolic process;lipid metabolic process;steroid biosynthetic process;C21-steroid hormone biosynthetic process;response to stress;metabolic process;steroid metabolic process;C21-steroid hormone metabolic process;lipid biosynthetic process;biosynthetic process;cellular process;regulation of hormone …	catalytic activity;alditol:NADP+ 1-oxidoreductase activity;aldo-keto reductase (NADP) activity;alcohol dehydrogenase (NADP+) activity;electron carrier activity;oxidoreductase activity;oxidoreductase activity, acting on CH-OH group of donors;oxidoreductase activity, acting on the CH-OH group of donors, NAD or NADP as acceptor;oxidoreductase activity, acting on the aldehyde or oxo group of donors;g…	extracellular space;nucleoplasm;cytoplasm;cytosol;vesicle;membrane-bounded vesicle;organelle;membrane-bounded organelle;extracellular organelle;extracellular region part;organelle part;intracellular part;nuclear part;cytoplasmic part;intracellular organelle part;cell part;extracellular membrane-bounded organelle;extracellular vesicular exosome;nucleoplasm;cytoplasm;organelle part;intracellular pa…	carbohydrate metabolic process;alcohol metabolic process;lipid metabolic process;response to stress;metabolic process;biosynthetic process;cellular process;hormone metabolic process;cellular metabolic process;primary metabolic process;small molecule metabolic process;response to stimulus;biological regulation	extracellular space;nucleoplasm;cytoplasm;cytosol;vesicle;organelle;extracellular organelle;cell part;nucleoplasm;cytoplasm;cell part
EZR	sp|P15311|EZRI_HUMAN	P15311	EZRI_HUMAN	Ezrin	586	0.983682	0.639594	25.8762	25.2134	25.0414	25.0083	24.4307	24.7733	26	21	20	23	15	17	22	17	17	18	11	14	41	35	34	37	27	33	196570112	135498512	111942088	88322928	56371316	104991256		1	0.999	34	122	99	207	endothelial cell development;epithelial cell development;sphingolipid signaling pathway;transport;endocytosis;receptor-mediated endocytosis;chemotaxis;organelle organization;cytoskeleton organization;actin filament organization;cytoskeletal anchoring at plasma membrane;cell adhesion;leukocyte cell-cell adhesion;establishment or maintenance of cell polarity;signal transduction;axon guidance;metabo…	actin binding;binding;protein binding;cytoskeletal protein binding;cell adhesion molecule binding;actin filament binding	ruffle;uropod;extracellular space;nucleolus;cytoplasm;cytosol;cytoskeleton;actin filament;plasma membrane;microvillus;brush border;adherens junction;cell-substrate adherens junction;focal adhesion;actin cytoskeleton;membrane;basolateral plasma membrane;apical plasma membrane;extrinsic to membrane;cell junction;cell-substrate junction;filopodium;T-tubule;cortical cytoskeleton;cell projection membr…	transport;endocytosis;organelle organization;cytoskeleton organization;cell adhesion;establishment or maintenance of cell polarity;signal transduction;metabolic process;response to external stimulus;cellular process;membrane invagination;cellular component organization;cellular membrane organization;vesicle-mediated transport;membrane docking;cellular component assembly;biological adhesion;develo…	extracellular space;nucleolus;cytoplasm;cytosol;cytoskeleton;plasma membrane;microvillus;brush border;membrane;filopodium;vesicle;macromolecular complex;cell projection;organelle;intracellular organelle;extracellular organelle;intracellular non-membrane-bounded organelle;protein complex;cell body;cell part;apical part of cell;nucleolus;cytoplasm;cytoskeleton;plasma membrane;membrane;organelle;int…
FERMT2	sp|Q96AC1|FERM2_HUMAN	Q96AC1	FERM2_HUMAN	Fermitin family homolog 2	680	0.982552	0.469057	23.3773	22.7518	22.756	22.6111	22.3327	22.5341	9	9	6	10	8	7	9	9	6	8	8	7	9	9	6	10	8	7	34961464	21928160	18150974	18579226	12168820	18374968		1	0.999	14	49	47	49	cell morphogenesis;cell morphogenesis involved in differentiation;protein complex assembly;cell-substrate junction assembly;cell adhesion;cell-matrix adhesion;signal transduction;cell surface receptor linked signaling pathway;enzyme linked receptor protein signaling pathway;transmembrane receptor protein serine/threonine kinase signaling pathway;transforming growth factor beta receptor signaling …	binding;phospholipid binding;phosphatidylinositol-3,4,5-trisphosphate binding;lipid binding;phosphatidylinositol binding	stress fiber;nucleus;nucleoplasm;cytoplasm;cytosol;adherens junction;cell-substrate adherens junction;focal adhesion;cell cortex;cell surface;extrinsic to plasma membrane;extrinsic to membrane;cell junction;cell-substrate junction;extrinsic to internal side of plasma membrane;cell projection membrane;leading edge membrane;lamellipodium membrane;I band;filamentous actin;actin filament bundle;macro…	cell morphogenesis;protein complex assembly;cell adhesion;signal transduction;anatomical structure morphogenesis;cellular process;cellular component organization;cellular membrane organization;cellular component assembly;biological adhesion;developmental process;cellular component morphogenesis;cell junction organization;response to stimulus;localization;cellular localization;membrane organizatio…	nucleus;nucleoplasm;cytoplasm;cytosol;cell cortex;cell surface;macromolecular complex;organelle;intracellular organelle;intracellular membrane-bounded organelle;protein complex;cell part;nucleoplasm;cell part;cytoskeleton;organelle;intracellular organelle;intracellular non-membrane-bounded organelle;cell part
PGD	sp|P52209|6PGD_HUMAN	P52209	6PGD_HUMAN	6-phosphogluconate dehydrogenase, decarboxylating	483	0.981714	0.432339	25.5123	25.3333	25.1219	25.2119	24.6198	24.8387	25	28	22	30	20	24	25	28	22	30	20	24	25	28	22	30	20	24	287302752	281856544	202799888	263478768	138146960	195926448		1	0.999	24	149	149	149	carbohydrate metabolic process;monosaccharide metabolic process;glucose metabolic process;glucose catabolic process;alcohol metabolic process;organic acid metabolic process;pentose-phosphate shunt;nucleobase-containing compound metabolic process;coenzyme metabolic process;oxidoreduction coenzyme metabolic process;NADP metabolic process;NADPH regeneration;nucleoside phosphate metabolic process;nit…	nucleotide binding;catalytic activity;phosphogluconate dehydrogenase (decarboxylating) activity;binding;oxidoreductase activity;oxidoreductase activity, acting on CH-OH group of donors;oxidoreductase activity, acting on the CH-OH group of donors, NAD or NADP as acceptor;cofactor binding;NADP binding;coenzyme binding;nucleotide binding;catalytic activity;phosphogluconate dehydrogenase (decarboxyla…	nucleus;cytosol;vesicle;membrane-bounded vesicle;organelle;membrane-bounded organelle;intracellular organelle;extracellular organelle;intracellular membrane-bounded organelle;extracellular region part;intracellular part;cytoplasmic part;cell part;extracellular membrane-bounded organelle;extracellular vesicular exosome	carbohydrate metabolic process;alcohol metabolic process;organic acid metabolic process;nucleobase-containing compound metabolic process;nitrogen compound metabolic process;metabolic process;catabolic process;biosynthetic process;nucleotide metabolic process;cellular process;cellular nitrogen compound metabolic process;cellular ketone metabolic process;cellular metabolic process;primary metabolic…	nucleus;cytosol;vesicle;organelle;intracellular organelle;extracellular organelle;intracellular membrane-bounded organelle;cell part
MSN	sp|P26038|MOES_HUMAN	P26038	MOES_HUMAN	Moesin	577	0.981679	0.572316	27.1039	26.4268	26.3806	26.3049	25.8152	26.0742	54	46	49	49	44	53	39	31	34	35	32	37	54	46	49	49	44	53	807702340	512479136	519388160	503455712	258483840	454163744		1	0.999	41	295	208	295	endothelial cell development;epithelial cell development;immune system process;regulation of immune system process;regulation of leukocyte migration;cellular component movement;cell adhesion;leukocyte cell-cell adhesion;positive regulation of metabolic process;cellular process;regulation of gene expression;positive regulation of macromolecule metabolic process;positive regulation of gene expressi…	nucleic acid binding;RNA binding;double-stranded RNA binding;receptor binding;structural molecule activity;structural constituent of cytoskeleton;binding;protein binding;enzyme binding;kinase binding;protein kinase binding;cell adhesion molecule binding	uropod;extracellular space;nucleus;cytoplasm;cytoskeleton;plasma membrane;microvillus;adherens junction;cell-substrate adherens junction;focal adhesion;membrane;basolateral plasma membrane;apical plasma membrane;extrinsic to membrane;cell junction;cell-substrate junction;filopodium;cell projection membrane;microvillus membrane;vesicle;membrane-bounded vesicle;cell projection;organelle;membrane-bo…	immune system process;cellular component movement;cell adhesion;cellular process;membrane docking;biological adhesion;developmental process;locomotion;cell development;anatomical structure development;cell motility;biological regulation	extracellular space;nucleus;cytoplasm;cytoskeleton;plasma membrane;microvillus;membrane;filopodium;vesicle;cell projection;organelle;intracellular organelle;extracellular organelle;intracellular membrane-bounded organelle;intracellular non-membrane-bounded organelle;cell part;apical part of cell;cytoplasm;cytoskeleton;organelle;intracellular organelle;intracellular non-membrane-bounded organelle;…
CYB5B	sp|O43169|CYB5B_HUMAN	O43169	CYB5B_HUMAN	Cytochrome b5 type B	150	0.979271	2.07165	27.2005	NaN	24.8016	24.094	23.8465	23.8477	12	1	6	6	5	7	12	1	6	6	5	7	12	1	6	6	5	7	484507136	2.38743e+06	89520328	50701696	43294484	38638876		1	0.999	6	37	37	37	metabolic process;oxidation-reduction process	binding;iron ion binding;heme binding;ion binding;cation binding;metal ion binding;tetrapyrrole binding;transition metal ion binding;binding;iron ion binding;heme binding;ion binding;cation binding;metal ion binding;tetrapyrrole binding;transition metal ion binding;binding;iron ion binding;heme binding;ion binding;cation binding;metal ion binding;tetrapyrrole binding;transition metal ion binding;…	mitochondrial outer membrane;membrane;integral to membrane;outer membrane;organelle membrane;intrinsic to membrane;mitochondrial membrane;organelle outer membrane;organelle part;intracellular part;membrane part;mitochondrial part;cytoplasmic part;intracellular organelle part;cell part;mitochondrial outer membrane;mitochondrial inner membrane;membrane;organelle inner membrane;outer membrane;organe…	metabolic process	membrane;cell part;membrane;cell part
NOP2	sp|P46087|NOP2_HUMAN	P46087	NOP2_HUMAN	28S rRNA (cytosine(4447)-C(5))-methyltransferase	812	0.979177	-0.634723	21.4823	22.0436	21.4996	22.7379	21.9021	22.2897	2	5	3	12	8	10	2	5	3	12	8	10	2	5	3	12	8	10	4.32832e+06	11647503	6905626	42756692	16797806	26552968		1	0.999	14	40	40	40	nucleobase-containing compound metabolic process;rRNA processing;RNA processing;nitrogen compound metabolic process;metabolic process;positive regulation of cell proliferation;cellular process;RNA metabolic process;rRNA metabolic process;ncRNA processing;cellular nitrogen compound metabolic process;ncRNA metabolic process;regulation of cell proliferation;macromolecule metabolic process;cellular m…	catalytic activity;methyltransferase activity;S-adenosylmethionine-dependent methyltransferase activity;transferase activity;transferase activity, transferring one-carbon groups;nucleic acid binding;RNA binding;catalytic activity;binding;methyltransferase activity;S-adenosylmethionine-dependent methyltransferase activity;transferase activity;transferase activity, transferring one-carbon groups;ca…	nucleolus;organelle;non-membrane-bounded organelle;intracellular organelle;intracellular non-membrane-bounded organelle;organelle part;intracellular part;nuclear part;intracellular organelle part;cell part;nucleolus;organelle;non-membrane-bounded organelle;intracellular organelle;intracellular non-membrane-bounded organelle;organelle part;intracellular part;nuclear part;intracellular organelle pa…	nucleobase-containing compound metabolic process;rRNA processing;RNA processing;nitrogen compound metabolic process;metabolic process;cellular process;RNA metabolic process;cellular nitrogen compound metabolic process;macromolecule metabolic process;cellular metabolic process;primary metabolic process;biological regulation;nucleobase-containing compound metabolic process;rRNA processing;RNA proce…	nucleolus;organelle;intracellular organelle;intracellular non-membrane-bounded organelle;cell part;nucleolus;organelle;intracellular organelle;intracellular non-membrane-bounded organelle;cell part
RPL11	sp|P62913|RL11_HUMAN	P62913	RL11_HUMAN	Large ribosomal subunit protein uL5	178	0.976838	0.458147	25.9602	25.7303	25.525	25.5685	24.9486	25.3239	11	11	9	12	8	10	11	11	9	12	8	10	11	11	9	12	8	10	204721040	187469952	147558368	151592544	96281816	66780392		1	0.999	10	61	61	61	nuclear-transcribed mRNA catabolic process, nonsense-mediated decay;nuclear-transcribed mRNA catabolic process;nucleobase-containing compound metabolic process;rRNA processing;RNA processing;RNA catabolic process;mRNA catabolic process;translation;translational initiation;translational elongation;translational termination;protein targeting;protein targeting to membrane;cotranslational protein tar…	nucleic acid binding;RNA binding;structural constituent of ribosome;structural molecule activity;binding;rRNA binding;structural constituent of ribosome;structural molecule activity;structural constituent of ribosome;structural molecule activity;structural constituent of ribosome;structural molecule activity	nucleolus;cytoplasm;cytosol;large ribosomal subunit;membrane;cytosolic large ribosomal subunit;ribonucleoprotein complex;vesicle;membrane-bounded vesicle;macromolecular complex;organelle;membrane-bounded organelle;non-membrane-bounded organelle;intracellular organelle;extracellular organelle;intracellular non-membrane-bounded organelle;extracellular region part;organelle part;intracellular part;n…	nucleobase-containing compound metabolic process;rRNA processing;RNA processing;RNA catabolic process;translation;translational initiation;translational elongation;protein targeting;nitrogen compound metabolic process;transport;metabolic process;catabolic process;biosynthetic process;cellular process;protein transport;viral reproduction;cellular component organization;RNA metabolic process;mRNA m…	nucleolus;cytoplasm;cytosol;membrane;ribonucleoprotein complex;vesicle;macromolecular complex;organelle;intracellular organelle;extracellular organelle;intracellular non-membrane-bounded organelle;cell part;ribosome;ribonucleoprotein complex;macromolecular complex;organelle;intracellular organelle;intracellular non-membrane-bounded organelle;cell part;ribosome;ribonucleoprotein complex;macromolec…
RDX	sp|P35241|RADI_HUMAN	P35241	RADI_HUMAN	Radixin	583	0.976796	0.516338	23.5233	22.9335	22.835	22.8215	22.4144	22.507	15	13	8	11	10	9	15	13	8	11	10	9	34	32	26	30	26	27	47771112	25750998	18207764	21487952	21976488	22629398		1	0.999	29	66	66	175	endothelial cell development;epithelial cell development;regulation of actin polymerization or depolymerization;protein localization;asymmetric protein localization;positive regulation of metabolic process;cellular process;regulation of gene expression;positive regulation of macromolecule metabolic process;positive regulation of gene expression;negative regulation of organelle organization;cellul…		ruffle;extracellular space;cytoplasm;cytoskeleton;plasma membrane;microvillus;adherens junction;cell-substrate adherens junction;focal adhesion;membrane;extrinsic to membrane;lamellipodium;cell junction;cell-substrate junction;filopodium;T-tubule;vesicle;membrane-bounded vesicle;cleavage furrow;cell division site part;stereocilium;cell projection;organelle;membrane-bounded organelle;non-membrane-…	cellular process;cellular component organization;cellular component assembly;developmental process;regulation of organelle organization;cell development;anatomical structure development;localization;biological regulation	extracellular space;cytoplasm;cytoskeleton;plasma membrane;microvillus;membrane;filopodium;vesicle;cell projection;organelle;intracellular organelle;extracellular organelle;intracellular non-membrane-bounded organelle;cell part;apical part of cell;cytoskeleton;organelle;intracellular organelle;intracellular non-membrane-bounded organelle;cell part;cytoplasm;cytoskeleton;organelle;intracellular or…
HSPD1	sp|P10809|CH60_HUMAN	P10809	CH60_HUMAN	60 kDa heat shock protein, mitochondrial	573	0.976039	0.847628	28.0623	26.8355	26.9185	26.5769	26.2517	26.4449	101	66	68	67	64	63	101	66	68	67	64	63	101	66	68	67	64	63	2485854980	1139173250	1187046530	893313980	695079550	799002940		1	0.999	48	429	429	429	cell activation;cytokine production;regulation of cytokine production;positive regulation of cytokine production;somatic diversification of immune receptors;somatic recombination of immunoglobulin genes involved in immune response;somatic diversification of immunoglobulins involved in immune response;activation of innate immune response;pattern recognition receptor signaling pathway;toll-like rec…	nucleotide binding;lipopolysaccharide binding;p53 binding;nucleic acid binding;DNA binding;DNA replication origin binding;single-stranded DNA binding;RNA binding;double-stranded RNA binding;catalytic activity;binding;protein binding;ATP binding;pyrophosphatase activity;hydrolase activity;hydrolase activity, acting on acid anhydrides;hydrolase activity, acting on acid anhydrides, in phosphorus-con…	extracellular space;cytoplasm;mitochondrion;mitochondrial inner membrane;mitochondrial matrix;endosome;early endosome;cytosol;plasma membrane;coated pit;cell surface;membrane;cytoplasmic membrane-bounded vesicle;organelle inner membrane;coated vesicle;stored secretory granule;organelle membrane;cytoplasmic vesicle;mitochondrial membrane;membrane-enclosed lumen;vesicle;membrane-bounded vesicle;mac…	cell activation;cytokine production;immune system process;nucleobase-containing compound metabolic process;DNA metabolic process;DNA recombination;protein folding;protein complex assembly;nitrogen compound metabolic process;response to stress;signal transduction;metabolic process;cell proliferation;cellular process;viral reproduction;cellular component organization;protein metabolic process;cellu…	extracellular space;cytoplasm;mitochondrion;endosome;cytosol;plasma membrane;cell surface;membrane;cytoplasmic membrane-bounded vesicle;vesicle;macromolecular complex;organelle;intracellular organelle;extracellular organelle;intracellular membrane-bounded organelle;protein complex;receptor complex;cell part;plasma membrane;membrane;cytoplasmic membrane-bounded vesicle;vesicle;organelle;intracellu…
TRAP1	sp|Q12931|TRAP1_HUMAN	Q12931	TRAP1_HUMAN	Heat shock protein 75 kDa, mitochondrial	704	0.973683	0.38624	23.6142	23.4165	23.1531	23.1979	22.7614	23.0658	17	14	10	12	13	10	17	14	10	12	13	10	18	15	12	13	14	11	67373624	62174660	32162172	43563232	35407320	42811720		1	0.999	22	76	76	83	regulation of translation;protein folding;response to stress;metabolic process;translational attenuation;regulation of biosynthetic process;cellular process;regulation of gene expression;regulation of macromolecule biosynthetic process;posttranscriptional regulation of gene expression;regulation of metabolic process;protein metabolic process;regulation of cellular metabolic process;regulation of …	nucleotide binding;receptor binding;cytokine receptor binding;tumor necrosis factor receptor binding;binding;protein binding;ATP binding;purine nucleotide binding;enzyme binding;kinase binding;protein kinase binding;adenyl nucleotide binding;ribonucleotide binding;purine ribonucleotide binding;adenyl ribonucleotide binding;tumor necrosis factor receptor superfamily binding;purine ribonucleoside t…	nucleoplasm;mitochondrion;mitochondrial inner membrane;mitochondrial intermembrane space;mitochondrial matrix;lipid particle;membrane;organelle inner membrane;organelle membrane;mitochondrial membrane;organelle envelope lumen;membrane-enclosed lumen;vesicle;membrane-bounded vesicle;organelle;membrane-bounded organelle;intracellular organelle;extracellular organelle;intracellular membrane-bounded …	regulation of translation;protein folding;response to stress;metabolic process;cellular process;protein metabolic process;macromolecule metabolic process;cellular metabolic process;primary metabolic process;response to stimulus;biological regulation;protein folding;response to stress;metabolic process;cellular process;protein metabolic process;macromolecule metabolic process;cellular metabolic pr…	nucleoplasm;mitochondrion;lipid particle;membrane;vesicle;organelle;intracellular organelle;extracellular organelle;intracellular membrane-bounded organelle;cell part;nucleoplasm;mitochondrion;organelle;intracellular organelle;intracellular membrane-bounded organelle;cell part
CSRP2	sp|Q16527|CSRP2_HUMAN	Q16527	CSRP2_HUMAN	Cysteine and glycine-rich protein 2	193	0.969101	0.488831	22.1092	22.2679	21.8149	21.8457	21.1955	21.6844	3	5	7	6	4	4	3	5	7	6	4	4	3	5	7	6	4	4	7660234	15701123	10474829	8947026	6944471	10684693		1	0.999	7	29	29	29	multicellular organismal development;cellular process;cell differentiation;multicellular organismal process;developmental process;cellular developmental process	binding;zinc ion binding;ion binding;cation binding;metal ion binding;transition metal ion binding;binding;zinc ion binding;ion binding;cation binding;metal ion binding;transition metal ion binding;binding;zinc ion binding;ion binding;cation binding;metal ion binding;transition metal ion binding;binding;zinc ion binding;ion binding;cation binding;metal ion binding;transition metal ion binding	nucleus;adherens junction;cell-substrate adherens junction;focal adhesion;cell junction;cell-substrate junction;organelle;membrane-bounded organelle;intracellular organelle;intracellular membrane-bounded organelle;intracellular part;cell part;anchoring junction	multicellular organismal development;cellular process;cell differentiation;multicellular organismal process;developmental process	nucleus;organelle;intracellular organelle;intracellular membrane-bounded organelle;cell part
LDHB	sp|P07195|LDHB_HUMAN	P07195	LDHB_HUMAN	L-lactate dehydrogenase B chain	334	0.968956	0.462343	27.6746	27.1862	27.1983	27.1792	26.6473	26.8456	28	32	34	38	27	27	28	32	34	38	27	27	30	33	35	39	28	28	1151210110	892688380	895007740	880819140	582038590	732547010		1	0.999	20	186	186	193	carbohydrate metabolic process;organic acid metabolic process;lactate metabolic process;pyruvate metabolic process;nucleobase-containing compound metabolic process;coenzyme metabolic process;oxidoreduction coenzyme metabolic process;nucleoside phosphate metabolic process;nitrogen compound metabolic process;metabolic process;nucleotide metabolic process;cellular process;pyridine nucleotide metabol…	nucleotide binding;catalytic activity;lactate dehydrogenase activity;L-lactate dehydrogenase activity;binding;oxidoreductase activity;oxidoreductase activity, acting on CH-OH group of donors;oxidoreductase activity, acting on the CH-OH group of donors, NAD or NADP as acceptor;cofactor binding;coenzyme binding;NAD binding;catalytic activity;oxidoreductase activity;oxidoreductase activity, acting o…	cytoplasm;mitochondrion;cytosol;membrane;vesicle;membrane-bounded vesicle;organelle;membrane-bounded organelle;intracellular organelle;extracellular organelle;intracellular membrane-bounded organelle;extracellular region part;intracellular part;membrane part;cytoplasmic part;cell part;membrane raft;extracellular membrane-bounded organelle;extracellular vesicular exosome;cytoplasm;mitochondrion;or…	carbohydrate metabolic process;organic acid metabolic process;nucleobase-containing compound metabolic process;nitrogen compound metabolic process;metabolic process;nucleotide metabolic process;cellular process;cellular nitrogen compound metabolic process;cellular ketone metabolic process;cellular metabolic process;primary metabolic process;small molecule metabolic process;heterocycle metabolic p…	cytoplasm;mitochondrion;cytosol;membrane;vesicle;organelle;intracellular organelle;extracellular organelle;intracellular membrane-bounded organelle;cell part;cytoplasm;mitochondrion;organelle;intracellular organelle;intracellular membrane-bounded organelle;cell part
PSMB4	sp|P28070|PSB4_HUMAN	P28070	PSB4_HUMAN	Proteasome subunit beta type-4	264	0.967566	0.880086	24.3855	23.1792	23.339	22.7557	22.4143	23.0933	6	4	3	2	2	2	6	4	3	2	2	2	6	4	3	2	2	2	41895300	15901423	16937470	10452672	8.14386e+06	12681819		1	0.999	6	19	19	19	G1/S transition of mitotic cell cycle;protein polyubiquitination;mitotic cell cycle;activation of innate immune response;innate immune response activating cell surface receptor signaling pathway;stimulatory C-type lectin receptor signaling pathway;activation of immune response;immune system process;immune response-activating cell surface receptor signaling pathway;antigen processing and presentat…	lipopolysaccharide binding;catalytic activity;endopeptidase activity;threonine-type endopeptidase activity;binding;peptidase activity;hydrolase activity;threonine-type peptidase activity;peptidase activity, acting on L-amino acid peptides	proteasome complex;nucleus;nucleoplasm;cytoplasm;cytosol;proteasome core complex;vesicle;membrane-bounded vesicle;macromolecular complex;organelle;membrane-bounded organelle;intracellular organelle;extracellular organelle;intracellular membrane-bounded organelle;protein complex;extracellular region part;organelle part;intracellular part;nuclear part;cytoplasmic part;intracellular organelle part;c…	mitotic cell cycle;immune system process;protein modification process;proteolysis;nitrogen compound metabolic process;response to stress;response to DNA damage stimulus;cell cycle;signal transduction;metabolic process;cell death;catabolic process;cellular process;viral reproduction;death;protein metabolic process;regulation of protein modification process;cellular nitrogen compound metabolic proc…	proteasome complex;nucleus;nucleoplasm;cytoplasm;cytosol;vesicle;macromolecular complex;organelle;intracellular organelle;extracellular organelle;intracellular membrane-bounded organelle;protein complex;cell part
TALDO1	sp|P37837|TALDO_HUMAN	P37837	TALDO_HUMAN	Transaldolase	337	0.966952	0.748535	24.753	23.6431	23.7935	23.4025	23.1092	23.4323	12	11	12	9	12	10	12	11	12	9	12	10	12	11	12	9	12	10	126222304	45690020	42308892	33317452	31222122	35993616		1	0.999	12	66	66	66	carbohydrate metabolic process;monosaccharide metabolic process;xylulose metabolic process;xylulose biosynthetic process;glucose metabolic process;glucose catabolic process;alcohol metabolic process;generation of precursor metabolites and energy;pentose-phosphate shunt;energy reserve metabolic process;nucleobase-containing compound metabolic process;coenzyme metabolic process;oxidoreduction coenz…	catalytic activity;sedoheptulose-7-phosphate:D-glyceraldehyde-3-phosphate glyceronetransferase activity;transferase activity;transferase activity, transferring aldehyde or ketonic groups;catalytic activity;sedoheptulose-7-phosphate:D-glyceraldehyde-3-phosphate glyceronetransferase activity;transferase activity;transferase activity, transferring aldehyde or ketonic groups;catalytic activity;cataly…	nucleus;cytoplasm;cytosol;vesicle;membrane-bounded vesicle;organelle;membrane-bounded organelle;intracellular organelle;extracellular organelle;intracellular membrane-bounded organelle;extracellular region part;intracellular part;cytoplasmic part;cell part;extracellular membrane-bounded organelle;extracellular vesicular exosome;cytoplasm;intracellular part;cell part	carbohydrate metabolic process;alcohol metabolic process;generation of precursor metabolites and energy;energy reserve metabolic process;nucleobase-containing compound metabolic process;nitrogen compound metabolic process;metabolic process;catabolic process;biosynthetic process;nucleotide metabolic process;cellular process;cellular nitrogen compound metabolic process;cellular metabolic process;pr…	nucleus;cytoplasm;cytosol;vesicle;organelle;intracellular organelle;extracellular organelle;intracellular membrane-bounded organelle;cell part;cytoplasm;cell part
CBR1	sp|P16152|CBR1_HUMAN	P16152	CBR1_HUMAN	Carbonyl reductase [NADPH] 1	277	0.964837	0.448325	24.5207	24.0843	23.9667	23.9638	23.4899	23.773	16	11	17	14	13	12	11	7	12	10	9	9	16	11	17	14	13	12	150585584	82046000	103395656	106230184	65860812	74680792		1	0.999	13	83	58	83	very long-chain fatty acid metabolic process;organic acid metabolic process;lipid metabolic process;fatty acid metabolic process;icosanoid metabolic process;vitamin metabolic process;fat-soluble vitamin metabolic process;metabolic process;cellular process;drug metabolic process;arachidonic acid metabolic process;cyclooxygenase pathway;carboxylic acid metabolic process;cell differentiation;epithel…	catalytic activity;carbonyl reductase (NADPH) activity;oxidoreductase activity;oxidoreductase activity, acting on CH-OH group of donors;oxidoreductase activity, acting on the CH-OH group of donors, NAD or NADP as acceptor;oxidoreductase activity, acting on NADH or NADPH;oxidoreductase activity, acting on NADH or NADPH, quinone or similar compound as acceptor;15-hydroxyprostaglandin dehydrogenase …	cytosol;vesicle;membrane-bounded vesicle;organelle;membrane-bounded organelle;extracellular organelle;extracellular region part;intracellular part;cytoplasmic part;cell part;extracellular membrane-bounded organelle;extracellular vesicular exosome	organic acid metabolic process;lipid metabolic process;vitamin metabolic process;metabolic process;cellular process;drug metabolic process;cell differentiation;developmental process;cellular ketone metabolic process;cellular metabolic process;primary metabolic process;cellular lipid metabolic process;small molecule metabolic process;cofactor metabolic process	cytosol;vesicle;organelle;extracellular organelle;cell part
PDIA3	sp|P30101|PDIA3_HUMAN	P30101	PDIA3_HUMAN	Protein disulfide-isomerase A3	505	0.964666	0.762459	25.2798	24.1991	24.3548	24.0057	23.5438	23.9968	32	29	26	27	22	22	32	29	26	27	22	22	32	29	26	27	22	22	424974016	164148096	180421712	154634464	110286096	138710784		1	0.999	28	158	158	158	immune system process;antigen processing and presentation of peptide antigen via MHC class I;antigen processing and presentation of exogenous peptide antigen;antigen processing and presentation of exogenous peptide antigen via MHC class I, TAP-dependent;carbohydrate metabolic process;protein folding;protein modification process;protein glycosylation;protein N-linked glycosylation;proteolysis;prot…	protein disulfide isomerase activity;catalytic activity;endopeptidase activity;cysteine-type endopeptidase activity;phospholipase activity;phospholipase C activity;phosphoric diester hydrolase activity;peptidase activity;cysteine-type peptidase activity;disulfide oxidoreductase activity;lipase activity;oxidoreductase activity;oxidoreductase activity, acting on a sulfur group of donors;hydrolase a…	nucleus;endoplasmic reticulum;endoplasmic reticulum lumen;smooth endoplasmic reticulum;adherens junction;cell-substrate adherens junction;focal adhesion;cell surface;cytoplasmic membrane-bounded vesicle;cell junction;cell-substrate junction;cytoplasmic vesicle;membrane-enclosed lumen;vesicle;membrane-bounded vesicle;melanosome;organelle;membrane-bounded organelle;intracellular organelle;extracell…	immune system process;carbohydrate metabolic process;protein folding;protein modification process;protein glycosylation;proteolysis;protein targeting;transport;nucleocytoplasmic transport;response to stress;signal transduction;metabolic process;cellular process;protein transport;peptidyl-amino acid modification;protein metabolic process;cellular homeostasis;homeostatic process;macromolecule metab…	nucleus;endoplasmic reticulum;cell surface;cytoplasmic membrane-bounded vesicle;vesicle;organelle;intracellular organelle;extracellular organelle;intracellular membrane-bounded organelle;cell part
PSMA3	sp|P25788|PSA3_HUMAN	P25788	PSA3_HUMAN	Proteasome subunit alpha type-3	255	0.964475	0.766219	23.1561	22.8803	22.8151	22.5759	21.4713	22.5057	4	4	5	3	2	3	4	4	5	3	2	3	4	4	5	3	2	3	27190352	20098070	14789523	10160555	3751866	14090132		1	0.999	6	21	21	21	G1/S transition of mitotic cell cycle;protein polyubiquitination;mitotic cell cycle;activation of innate immune response;innate immune response activating cell surface receptor signaling pathway;stimulatory C-type lectin receptor signaling pathway;activation of immune response;immune system process;immune response-activating cell surface receptor signaling pathway;antigen processing and presentat…	catalytic activity;endopeptidase activity;threonine-type endopeptidase activity;peptidase activity;hydrolase activity;threonine-type peptidase activity;peptidase activity, acting on L-amino acid peptides;catalytic activity;endopeptidase activity;peptidase activity;hydrolase activity;peptidase activity, acting on L-amino acid peptides;catalytic activity;endopeptidase activity;threonine-type endope…	proteasome complex;nucleus;nucleoplasm;cytoplasm;cytosol;proteasome core complex;proteasome core complex, alpha-subunit complex;vesicle;membrane-bounded vesicle;macromolecular complex;organelle;membrane-bounded organelle;intracellular organelle;extracellular organelle;intracellular membrane-bounded organelle;protein complex;extracellular region part;organelle part;intracellular part;nuclear part;…	mitotic cell cycle;immune system process;protein modification process;proteolysis;nitrogen compound metabolic process;response to stress;response to DNA damage stimulus;cell cycle;signal transduction;metabolic process;cell death;catabolic process;cellular process;viral reproduction;death;protein metabolic process;regulation of protein modification process;cellular nitrogen compound metabolic proc…	proteasome complex;nucleus;nucleoplasm;cytoplasm;cytosol;vesicle;macromolecular complex;organelle;intracellular organelle;extracellular organelle;intracellular membrane-bounded organelle;protein complex;cell part;nucleus;macromolecular complex;organelle;intracellular organelle;intracellular membrane-bounded organelle;protein complex;cell part;macromolecular complex;protein complex;cell part;nucle…
HINT1	sp|P49773|HINT1_HUMAN	P49773	HINT1_HUMAN	Adenosine 5'-monophosphoramidase HINT1	126	0.960643	0.661238	25.2981	24.6701	24.3832	24.4728	23.9216	23.9733	8	5	4	5	4	7	8	5	4	5	4	7	8	5	4	5	4	7	104253344	64997388	48049756	65388960	37219528	52102364		1	0.999	6	33	33	33	nucleobase-containing compound metabolic process;purine nucleotide metabolic process;purine nucleotide catabolic process;transcription, DNA-dependent;regulation of transcription, DNA-dependent;nucleoside phosphate metabolic process;nitrogen compound metabolic process;induction of apoptosis;signal transduction;metabolic process;induction of apoptosis by intracellular signals;catabolic process;bios…	nucleotide binding;catalytic activity;protein kinase C binding;binding;protein binding;hydrolase activity;enzyme binding;kinase binding;protein kinase binding;catalytic activity;catalytic activity;catalytic activity;catalytic activity	histone deacetylase complex;nucleus;cytoplasm;cytoskeleton;plasma membrane;membrane;chromatin remodeling complex;vesicle;membrane-bounded vesicle;macromolecular complex;organelle;membrane-bounded organelle;non-membrane-bounded organelle;intracellular organelle;extracellular organelle;intracellular membrane-bounded organelle;intracellular non-membrane-bounded organelle;protein complex;extracellula…	nucleobase-containing compound metabolic process;nitrogen compound metabolic process;signal transduction;metabolic process;catabolic process;biosynthetic process;nucleotide metabolic process;cellular process;RNA metabolic process;cellular nitrogen compound metabolic process;nucleobase-containing compound catabolic process;macromolecule metabolic process;cellular metabolic process;primary metaboli…	nucleus;cytoplasm;cytoskeleton;plasma membrane;membrane;chromatin remodeling complex;vesicle;macromolecular complex;organelle;intracellular organelle;extracellular organelle;intracellular membrane-bounded organelle;intracellular non-membrane-bounded organelle;protein complex;cell part
DDX39A	sp|O00148|DX39A_HUMAN	O00148	DX39A_HUMAN	ATP-dependent RNA helicase DDX39A	427	0.960459	0.471686	24.8914	24.7574	24.3044	24.4309	23.925	24.1822	17	16	15	14	15	12	4	5	6	5	7	3	17	16	15	14	15	12	91277664	114301672	79909216	48179860	65280808	67022288		1	0.999	15	89	30	89	RNA splicing, via transesterification reactions;RNA splicing, via transesterification reactions with bulged adenosine as nucleophile;nuclear mRNA splicing, via spliceosome;nucleobase-containing compound metabolic process;RNA processing;mRNA processing;RNA export from nucleus;mRNA export from nucleus;nitrogen compound metabolic process;transport;nucleocytoplasmic transport;response to stress;respo…	nucleotide binding;RNA helicase activity;catalytic activity;ATP-dependent RNA helicase activity;helicase activity;binding;ATP binding;ATP-dependent helicase activity;RNA-dependent ATPase activity;pyrophosphatase activity;hydrolase activity;hydrolase activity, acting on acid anhydrides;hydrolase activity, acting on acid anhydrides, in phosphorus-containing anhydrides;ATPase activity;purine nucleot…	nucleus;spliceosomal complex;nucleolus;cytoplasm;membrane;ribonucleoprotein complex;macromolecular complex;organelle;membrane-bounded organelle;non-membrane-bounded organelle;intracellular organelle;intracellular membrane-bounded organelle;intracellular non-membrane-bounded organelle;organelle part;intracellular part;nuclear part;intracellular organelle part;cell part	nucleobase-containing compound metabolic process;RNA processing;mRNA processing;nitrogen compound metabolic process;transport;nucleocytoplasmic transport;response to stress;response to DNA damage stimulus;metabolic process;RNA splicing;cellular process;nucleobase-containing compound transport;RNA metabolic process;mRNA metabolic process;cellular nitrogen compound metabolic process;macromolecule m…	nucleus;spliceosomal complex;nucleolus;cytoplasm;membrane;ribonucleoprotein complex;macromolecular complex;organelle;intracellular organelle;intracellular membrane-bounded organelle;intracellular non-membrane-bounded organelle;cell part
KPNA4	sp|O00629|IMA3_HUMAN	O00629	IMA3_HUMAN	Importin subunit alpha-3	521	0.9601	0.55478	21.498	21.0533	20.9678	21.0427	20.4649	20.3471	4	3	2	2	2	3	4	3	2	2	2	3	4	3	2	2	2	3	6174271	4.71086e+06	2.4726e+06	4917476	1.74421e+06	1.60672e+06		1	0.999	5	16	16	16	response to reactive oxygen species;protein targeting;protein import into nucleus;NLS-bearing substrate import into nucleus;transport;intracellular protein transport;nucleocytoplasmic transport;response to stress;response to oxidative stress;signal transduction;cell surface receptor linked signaling pathway;cellular process;response to organic substance;response to inorganic substance;protein tra…	transporter activity;protein transporter activity;substrate-specific transporter activity	nucleoplasm;cytosol;vesicle;membrane-bounded vesicle;organelle;membrane-bounded organelle;extracellular organelle;extracellular region part;organelle part;intracellular part;nuclear part;cytoplasmic part;intracellular organelle part;cell part;extracellular membrane-bounded organelle;extracellular vesicular exosome	protein targeting;transport;nucleocytoplasmic transport;response to stress;response to oxidative stress;signal transduction;cellular process;protein transport;response to chemical stimulus;response to stimulus;nuclear transport;establishment of localization;biological regulation	nucleoplasm;cytosol;vesicle;organelle;extracellular organelle;cell part
ETF1	sp|P62495|ERF1_HUMAN	P62495	ERF1_HUMAN	Eukaryotic peptide chain release factor subunit 1	437	0.958414	0.600231	23.219	22.4614	22.7349	22.5477	21.8831	22.1839	6	4	5	6	5	7	6	4	5	6	5	7	6	4	5	6	5	7	25109652	13117818	23458748	18836206	13196152	10601884		1	0.999	10	33	33	33	nuclear-transcribed mRNA catabolic process, nonsense-mediated decay;nuclear-transcribed mRNA catabolic process;nucleobase-containing compound metabolic process;RNA catabolic process;mRNA catabolic process;translation;translational termination;regulation of translation;regulation of translational termination;protein modification process;protein methylation;one-carbon metabolic process;nitrogen com…	nucleic acid binding;RNA binding;translation release factor activity;binding;translation termination factor activity;translation factor activity, nucleic acid binding;translation release factor activity, codon specific;ribonucleoprotein binding;ribosome binding;nucleic acid binding;RNA binding;translation release factor activity;binding;translation termination factor activity;translation factor a…	cytoplasm;cytosol;translation release factor complex;macromolecular complex;protein complex;intracellular part;cytoplasmic part;cell part;cytoplasm;intracellular part;cell part;cytoplasm;intracellular part;cell part;cytoplasm;intracellular part;cell part;cytoplasm;intracellular part;cell part	nucleobase-containing compound metabolic process;RNA catabolic process;translation;regulation of translation;protein modification process;one-carbon metabolic process;nitrogen compound metabolic process;metabolic process;protein alkylation;catabolic process;biosynthetic process;cellular process;cellular component organization;RNA metabolic process;mRNA metabolic process;protein metabolic process;…	cytoplasm;cytosol;macromolecular complex;protein complex;cell part;cytoplasm;cell part;cytoplasm;cell part;cytoplasm;cell part;cytoplasm;cell part
PHB2	sp|Q99623|PHB2_HUMAN	Q99623	PHB2_HUMAN	Prohibitin-2	299	0.952867	3.10569	26.3011	NaN	22.7075	21.5694	20.839	21.7875	23	1	10	5	5	7	23	1	10	5	5	7	23	1	10	5	5	7	694454980	0	42160544	8414925	5.21418e+06	17145356		1	0.999	16	51	51	51	morphogenesis of a branching structure;morphogenesis of an epithelium;developmental process involved in reproduction;nucleobase-containing compound metabolic process;transcription, DNA-dependent;regulation of transcription, DNA-dependent;nitrogen compound metabolic process;organelle organization;mitochondrion organization;metabolic process;negative regulation of cell proliferation;biosynthetic pr…	receptor binding;binding;protein binding;estrogen receptor binding;nuclear hormone receptor binding;steroid hormone receptor binding;protein N-terminus binding;hormone receptor binding	nucleus;mitochondrion;mitochondrial outer membrane;mitochondrial inner membrane;cell surface;membrane;nuclear matrix;organelle inner membrane;outer membrane;organelle membrane;mitochondrial membrane;organelle outer membrane;vesicle;membrane-bounded vesicle;macromolecular complex;organelle;membrane-bounded organelle;intracellular organelle;extracellular organelle;intracellular membrane-bounded org…	nucleobase-containing compound metabolic process;nitrogen compound metabolic process;organelle organization;mitochondrion organization;metabolic process;biosynthetic process;anatomical structure morphogenesis;cellular process;cellular component organization;RNA metabolic process;multicellular organismal process;developmental process;cellular nitrogen compound metabolic process;macromolecule metab…	nucleus;mitochondrion;cell surface;membrane;vesicle;macromolecular complex;organelle;intracellular organelle;extracellular organelle;intracellular membrane-bounded organelle;protein complex;cell part;membrane;cell part;membrane;cell part;mitochondrion;membrane;organelle;intracellular organelle;intracellular membrane-bounded organelle;cell part;membrane;cell part;membrane;cell part;membrane;cell p…
GMPS	sp|P49915|GUAA_HUMAN	P49915	GUAA_HUMAN	GMP synthase [glutamine-hydrolyzing]	693	0.952035	0.552533	22.5967	21.9395	21.9556	21.8905	21.3223	21.6213	9	6	7	7	5	8	9	6	7	7	5	8	9	6	7	7	5	8	28209926	15040097	13794564	16448264	9078514	14252282		1	0.999	13	42	42	42	organic acid metabolic process;nucleobase-containing compound metabolic process;purine base metabolic process;purine nucleotide metabolic process;purine nucleotide biosynthetic process;cellular amino acid metabolic process;glutamine metabolic process;cellular aromatic compound metabolic process;nucleoside phosphate metabolic process;nitrogen compound metabolic process;metabolic process;biosynthet…	nucleotide binding;catalytic activity;GMP synthase activity;GMP synthase (glutamine-hydrolyzing) activity;binding;ATP binding;pyrophosphatase activity;hydrolase activity;hydrolase activity, acting on acid anhydrides;hydrolase activity, acting on acid anhydrides, in phosphorus-containing anhydrides;ligase activity;ligase activity, forming carbon-nitrogen bonds;carbon-nitrogen ligase activity, with…	cytoplasm;cytosol;intracellular part;cytoplasmic part;cell part	organic acid metabolic process;nucleobase-containing compound metabolic process;cellular amino acid metabolic process;cellular aromatic compound metabolic process;nitrogen compound metabolic process;metabolic process;biosynthetic process;nucleotide metabolic process;amine metabolic process;cellular process;cellular nitrogen compound metabolic process;cellular ketone metabolic process;response to …	cytoplasm;cytosol;cell part
PEBP1	sp|P30086|PEBP1_HUMAN	P30086	PEBP1_HUMAN	Phosphatidylethanolamine-binding protein 1	187	0.950753	0.657932	24.702	24.0401	23.7266	23.5545	23.2166	23.7238	9	7	9	7	5	6	9	7	9	7	5	6	9	7	9	7	5	6	98511392	58576088	65043400	33977716	30625670	41214616		1	0.999	8	43	43	43		nucleotide binding;enzyme inhibitor activity;endopeptidase inhibitor activity;serine-type endopeptidase inhibitor activity;binding;protein binding;ATP binding;phospholipid binding;lipid binding;phosphatidylethanolamine binding;purine nucleotide binding;enzyme binding;kinase binding;protein kinase binding;enzyme regulator activity;peptidase inhibitor activity;adenyl nucleotide binding;ribonucleoti…	nucleus;cytoplasm;vesicle;membrane-bounded vesicle;organelle;membrane-bounded organelle;intracellular organelle;extracellular organelle;intracellular membrane-bounded organelle;extracellular region part;intracellular part;cell part;extracellular membrane-bounded organelle;extracellular vesicular exosome		nucleus;cytoplasm;vesicle;organelle;intracellular organelle;extracellular organelle;intracellular membrane-bounded organelle;cell part
THRAP3	sp|Q9Y2W1|TR150_HUMAN	Q9Y2W1	TR150_HUMAN	Thyroid hormone receptor-associated protein 3	955	0.948126	0.650791	22.1575	21.7831	21.6816	21.4039	20.6616	21.6043	5	3	3	3	2	3	5	3	3	3	2	3	5	3	3	3	2	3	15471707	6553227	7.1881e+06	5958517	3.01919e+06	9221442		1	0.9989	6	19	19	19	regulation of alternative nuclear mRNA splicing, via spliceosome;nuclear-transcribed mRNA catabolic process;nucleobase-containing compound metabolic process;transcription initiation, DNA-dependent;regulation of transcription, DNA-dependent;regulation of transcription from RNA polymerase II promoter;transcription initiation from RNA polymerase II promoter;RNA processing;mRNA processing;RNA catabol…	nucleotide binding;regulatory region DNA binding;transcription regulatory region sequence-specific DNA binding;protein binding transcription factor activity;transcription factor binding transcription factor activity;core promoter sequence-specific DNA binding;core promoter binding;regulatory region nucleic acid binding;RNA polymerase II transcription factor binding transcription factor activity;R…	nucleus;nucleoplasm;mediator complex;vesicle;membrane-bounded vesicle;macromolecular complex;organelle;membrane-bounded organelle;intracellular organelle;extracellular organelle;intracellular membrane-bounded organelle;protein complex;extracellular region part;organelle part;intracellular part;nuclear part;intracellular organelle part;nucleoplasm part;cell part;extracellular membrane-bounded orga…	nucleobase-containing compound metabolic process;transcription initiation, DNA-dependent;RNA processing;mRNA processing;RNA catabolic process;nitrogen compound metabolic process;signal transduction;metabolic process;RNA splicing;catabolic process;biosynthetic process;cellular process;RNA metabolic process;mRNA metabolic process;cellular nitrogen compound metabolic process;macromolecule metabolic …	nucleus;nucleoplasm;vesicle;macromolecular complex;organelle;intracellular organelle;extracellular organelle;intracellular membrane-bounded organelle;protein complex;cell part
MT-CO2	sp|P00403|COX2_HUMAN	P00403	COX2_HUMAN	Cytochrome c oxidase subunit 2	227	0.946054	1.88994	26.0497	NaN	23.8052	23.2663	22.8338	23.0125	10	1	3	2	3	3	10	1	3	2	3	3	10	1	3	2	3	3	179684464	4698099	26949932	17927560	14232614	16655100		1	0.999	6	22	22	22	generation of precursor metabolites and energy;mitochondrial electron transport, cytochrome c to oxygen;nucleobase-containing compound metabolic process;transcription initiation, DNA-dependent;transcription initiation from RNA polymerase II promoter;nitrogen compound metabolic process;metabolic process;biosynthetic process;cellular process;gene expression;RNA metabolic process;electron transport …	catalytic activity;cytochrome-c oxidase activity;transporter activity;binding;copper ion binding;cation transmembrane transporter activity;heme-copper terminal oxidase activity;ion transmembrane transporter activity;monovalent inorganic cation transmembrane transporter activity;hydrogen ion transmembrane transporter activity;oxidoreductase activity;oxidoreductase activity, acting on a heme group …	mitochondrion;mitochondrial inner membrane;membrane;integral to membrane;organelle inner membrane;organelle membrane;intrinsic to membrane;mitochondrial membrane;vesicle;membrane-bounded vesicle;macromolecular complex;organelle;membrane-bounded organelle;intracellular organelle;extracellular organelle;intracellular membrane-bounded organelle;protein complex;extracellular region part;organelle par…	generation of precursor metabolites and energy;nucleobase-containing compound metabolic process;transcription initiation, DNA-dependent;nitrogen compound metabolic process;metabolic process;biosynthetic process;cellular process;RNA metabolic process;cellular nitrogen compound metabolic process;macromolecule metabolic process;cellular metabolic process;primary metabolic process;small molecule meta…	mitochondrion;membrane;vesicle;macromolecular complex;organelle;intracellular organelle;extracellular organelle;intracellular membrane-bounded organelle;protein complex;cell part;respiratory chain complex IV
ARPC3	sp|O15145|ARPC3_HUMAN	O15145	ARPC3_HUMAN	Actin-related protein 2/3 complex subunit 3	178	0.945898	0.473499	23.6935	23.1805	23.3727	23.2824	22.6695	22.8742	6	6	5	8	4	5	6	6	5	8	4	5	6	6	5	8	4	5	36014848	26442460	23759212	30718076	16050180	20305848		1	0.999	7	34	34	34	immune system process;cellular component movement;chemotaxis;response to stress;defense response;immune response;organelle organization;cytoskeleton organization;actin filament organization;signal transduction;cell surface receptor linked signaling pathway;enzyme linked receptor protein signaling pathway;transmembrane receptor protein tyrosine kinase signaling pathway;small GTPase mediated signal…	structural molecule activity;structural constituent of cytoskeleton	cytosol;cytoskeleton;Arp2/3 protein complex;adherens junction;cell-substrate adherens junction;focal adhesion;actin cytoskeleton;membrane;lamellipodium;cell junction;cell-substrate junction;vesicle;membrane-bounded vesicle;macromolecular complex;cell projection;organelle;membrane-bounded organelle;non-membrane-bounded organelle;intracellular organelle;extracellular organelle;intracellular non-mem…	immune system process;cellular component movement;response to stress;organelle organization;cytoskeleton organization;signal transduction;response to external stimulus;cellular process;cellular component organization;regulation of organelle organization;locomotion;response to chemical stimulus;response to stimulus;biological regulation;organelle organization;cytoskeleton organization;cellular pro…	cytosol;cytoskeleton;membrane;vesicle;macromolecular complex;cell projection;organelle;intracellular organelle;extracellular organelle;intracellular non-membrane-bounded organelle;protein complex;cell part;cytoplasm;macromolecular complex;protein complex;cell part;macromolecular complex;protein complex;cell part;macromolecular complex;protein complex;cell part
GFM1	sp|Q96RP9|EFGM_HUMAN	Q96RP9	EFGM_HUMAN	Elongation factor G, mitochondrial	751	0.942551	0.533793	21.4858	21.844	NaN	21.2149	NaN	21.0473	5	3	1	4	1	2	5	3	1	4	1	2	5	3	1	4	1	2	6.75972e+06	7165764	1.77052e+06	3379219	1.87429e+06	4.06684e+06		1	0.9986	8	16	16	16	translation;translational elongation;organelle organization;mitochondrion organization;metabolic process;biosynthetic process;macromolecule biosynthetic process;cellular process;cellular component organization;protein metabolic process;mitochondrial translation;cellular macromolecule biosynthetic process;macromolecule metabolic process;cellular metabolic process;primary metabolic process;cellular…	nucleotide binding;nucleic acid binding;RNA binding;translation elongation factor activity;catalytic activity;GTPase activity;binding;GTP binding;translation factor activity, nucleic acid binding;pyrophosphatase activity;hydrolase activity;hydrolase activity, acting on acid anhydrides;hydrolase activity, acting on acid anhydrides, in phosphorus-containing anhydrides;purine nucleotide binding;nucl…	mitochondrial matrix;membrane-enclosed lumen;organelle lumen;organelle part;intracellular part;mitochondrial part;cytoplasmic part;intracellular organelle part;cell part;intracellular organelle lumen;mitochondrion;organelle;membrane-bounded organelle;intracellular organelle;intracellular membrane-bounded organelle;intracellular part;cytoplasmic part;cell part;intracellular;cell part;mitochondrion…	translation;translational elongation;organelle organization;mitochondrion organization;metabolic process;biosynthetic process;cellular process;cellular component organization;protein metabolic process;mitochondrial translation;macromolecule metabolic process;cellular metabolic process;primary metabolic process;translational elongation;metabolic process;biosynthetic process;cellular process;macrom…	cell part;mitochondrion;organelle;intracellular organelle;intracellular membrane-bounded organelle;cell part;intracellular;cell part;mitochondrion;organelle;intracellular organelle;intracellular membrane-bounded organelle;cell part
SEC31A	sp|O94979|SC31A_HUMAN	O94979	SC31A_HUMAN	Protein transport protein Sec31A	1220	0.942529	0.453485	22.4741	22.3002	22.0486	22.1893	21.5706	21.7025	5	13	6	6	8	6	5	13	6	6	8	6	5	13	6	6	8	6	19160214	23140726	5409013	12921476	11860804	9452600		1	0.999	17	44	44	44	immune system process;antigen processing and presentation of peptide antigen via MHC class I;antigen processing and presentation of exogenous peptide antigen;antigen processing and presentation of peptide antigen via MHC class II;antigen processing and presentation of peptide or polysaccharide antigen via MHC class II;carbohydrate metabolic process;protein modification process;protein glycosylati…	binding;protein binding;calcium-dependent protein binding	Golgi membrane;cytoplasm;endoplasmic reticulum;endoplasmic reticulum membrane;cytosol;vesicle membrane;ER to Golgi transport vesicle membrane;membrane;cytoplasmic membrane-bounded vesicle;membrane coat;vesicle coat;COPII vesicle coat;transport vesicle;ER to Golgi transport vesicle;coated vesicle;transport vesicle membrane;cytoplasmic vesicle membrane;coated vesicle membrane;organelle membrane;cyt…	immune system process;carbohydrate metabolic process;protein modification process;protein glycosylation;transport;response to stress;organelle organization;signal transduction;metabolic process;cellular process;protein transport;cellular component organization;vesicle organization;vesicle-mediated transport;peptidyl-amino acid modification;protein metabolic process;response to chemical stimulus;m…	cytoplasm;endoplasmic reticulum;cytosol;membrane;cytoplasmic membrane-bounded vesicle;vesicle;macromolecular complex;organelle;intracellular organelle;intracellular membrane-bounded organelle;protein complex;cell part;cytoplasm;organelle;intracellular organelle;intracellular membrane-bounded organelle;cell part;cytoplasm;organelle;intracellular organelle;intracellular membrane-bounded organelle;c…
CPS1	sp|P31327|CPSM_HUMAN	P31327	CPSM_HUMAN	Carbamoyl-phosphate synthase [ammonia], mitochondrial	1500	0.937155	0.439624	25.0127	24.8981	24.6362	24.7744	24.142	24.3118	76	77	70	75	63	64	73	73	66	70	59	62	76	77	70	75	63	64	602344830	582136190	428280352	540544580	295495456	342556576		1	0.999	67	425	403	425	urea cycle;citrulline metabolic process;sulfur amino acid metabolic process;polysaccharide catabolic process;response to acid;response to molecule of bacterial origin;carbohydrate metabolic process;polysaccharide metabolic process;glycogen metabolic process;glycogen catabolic process;cellular glucan metabolic process;organic acid metabolic process;generation of precursor metabolites and energy;en…	nucleotide binding;catalytic activity;carbamoyl-phosphate synthase (ammonia) activity;carbamoyl-phosphate synthase (glutamine-hydrolyzing) activity;endopeptidase activity;binding;calcium ion binding;ATP binding;phospholipid binding;peptidase activity;lipid binding;glutamate binding;amino acid binding;hydrolase activity;ligase activity;ligase activity, forming carbon-nitrogen bonds;carbon-nitrogen…	nucleolus;mitochondrial inner membrane;mitochondrial matrix;nucleoid;membrane;organelle inner membrane;organelle membrane;mitochondrial membrane;membrane-enclosed lumen;macromolecular complex;mitochondrial nucleoid;organelle;non-membrane-bounded organelle;intracellular organelle;intracellular non-membrane-bounded organelle;organelle lumen;protein complex;organelle part;intracellular part;nuclear …	carbohydrate metabolic process;polysaccharide metabolic process;organic acid metabolic process;generation of precursor metabolites and energy;energy reserve metabolic process;cellular amino acid metabolic process;lipid metabolic process;glycerol ether metabolic process;sulfur compound metabolic process;nitrogen compound metabolic process;response to stress;metabolic process;catabolic process;bios…	nucleolus;membrane;macromolecular complex;organelle;intracellular organelle;intracellular non-membrane-bounded organelle;protein complex;cell part
RPS19	sp|P39019|RS19_HUMAN	P39019	RS19_HUMAN	Small ribosomal subunit protein eS19	145	0.937119	0.593132	22.7559	22.2164	NaN	21.8691	21.664	22.146	3	2	1	2	3	3	3	2	1	2	3	3	3	2	1	2	3	3	14890934	7849597	3971166	6.22156e+06	7115089	9412489		1	0.9986	3	14	14	14	ribosomal small subunit assembly;nuclear-transcribed mRNA catabolic process, nonsense-mediated decay;maturation of SSU-rRNA from tricistronic rRNA transcript (SSU-rRNA, 5.8S rRNA, LSU-rRNA);nuclear-transcribed mRNA catabolic process;immune system process;monocyte chemotaxis;regulation of immune system process;negative regulation of immune system process;positive regulation of immune system proces…	structural constituent of ribosome;structural molecule activity;binding;protein binding;fibroblast growth factor binding;growth factor binding;enzyme binding;kinase binding;protein kinase binding;identical protein binding;protein homodimerization activity;protein dimerization activity;structural constituent of ribosome;structural molecule activity;structural constituent of ribosome;structural mol…	nucleolus;cytoplasm;cytosol;ribosome;adherens junction;cell-substrate adherens junction;focal adhesion;small ribosomal subunit;membrane;cytosolic small ribosomal subunit;cell junction;cell-substrate junction;ribonucleoprotein complex;vesicle;membrane-bounded vesicle;macromolecular complex;organelle;membrane-bounded organelle;non-membrane-bounded organelle;intracellular organelle;extracellular org…	immune system process;nucleobase-containing compound metabolic process;rRNA processing;RNA processing;RNA catabolic process;translation;translational initiation;translational elongation;protein complex assembly;protein targeting;nitrogen compound metabolic process;transport;cellular component movement;organelle organization;nucleus organization;metabolic process;catabolic process;biosynthetic pro…	nucleolus;cytoplasm;cytosol;ribosome;small ribosomal subunit;membrane;ribonucleoprotein complex;vesicle;macromolecular complex;organelle;intracellular organelle;extracellular organelle;intracellular non-membrane-bounded organelle;cell part;ribosome;ribonucleoprotein complex;macromolecular complex;organelle;intracellular organelle;intracellular non-membrane-bounded organelle;cell part;ribosome;rib…
MCCC1	sp|Q96RQ3|MCCA_HUMAN	Q96RQ3	MCCA_HUMAN	Methylcrotonoyl-CoA carboxylase subunit alpha, mitochondrial	725	0.936236	0.528561	23.4552	24.3333	24.0217	23.3487	23.3472	23.5286	8	21	19	15	15	16	8	21	19	15	15	16	8	21	19	15	15	16	56564872	143296192	117680264	64937916	64486256	66783224		1	0.999	19	94	94	94	organic acid metabolic process;cellular amino acid metabolic process;leucine metabolic process;leucine catabolic process;vitamin metabolic process;water-soluble vitamin metabolic process;biotin metabolic process;sulfur compound metabolic process;nitrogen compound metabolic process;metabolic process;catabolic process;cellular amino acid catabolic process;branched chain family amino acid metabolic …	nucleotide binding;catalytic activity;biotin carboxylase activity;methylcrotonoyl-CoA carboxylase activity;binding;ATP binding;biotin binding;CoA carboxylase activity;ligase activity;ligase activity, forming carbon-nitrogen bonds;ligase activity, forming carbon-carbon bonds;purine nucleotide binding;vitamin binding;adenyl nucleotide binding;carboxylic acid binding;ribonucleotide binding;purine ri…	mitochondrion;mitochondrial inner membrane;mitochondrial matrix;cytosol;membrane;organelle inner membrane;organelle membrane;mitochondrial membrane;membrane-enclosed lumen;organelle;membrane-bounded organelle;intracellular organelle;intracellular membrane-bounded organelle;organelle lumen;organelle part;intracellular part;mitochondrial part;cytoplasmic part;intracellular organelle part;cell part;…	organic acid metabolic process;cellular amino acid metabolic process;vitamin metabolic process;sulfur compound metabolic process;nitrogen compound metabolic process;metabolic process;catabolic process;amine metabolic process;cellular process;cellular nitrogen compound metabolic process;cellular ketone metabolic process;cellular amide metabolic process;cellular metabolic process;primary metabolic …	mitochondrion;cytosol;membrane;organelle;intracellular organelle;intracellular membrane-bounded organelle;cell part;mitochondrion;organelle;intracellular organelle;intracellular membrane-bounded organelle;cell part;mitochondrion;organelle;intracellular organelle;intracellular membrane-bounded organelle;cell part;mitochondrion;organelle;intracellular organelle;intracellular membrane-bounded organe…
NQO1	sp|P15559|NQO1_HUMAN	P15559	NQO1_HUMAN	NAD(P)H dehydrogenase [quinone] 1	274	0.93571	0.679405	27.1237	26.4935	26.0636	26.0669	25.5994	25.9763	12	10	7	6	6	8	12	10	7	6	6	8	12	10	7	6	6	8	189426144	394174144	63722008	68842960	209000144	251673840		1	0.999	12	49	49	49	regulation of cellular amino acid metabolic process;xenobiotic metabolic process;nitrogen compound metabolic process;nitric oxide biosynthetic process;cell communication;cell-cell signaling;synaptic transmission;synaptic transmission, cholinergic;aging;response to nutrient;metabolic process;biosynthetic process;response to external stimulus;response to toxin;response to endogenous stimulus;respon…	catalytic activity;NAD(P)H dehydrogenase (quinone) activity;cytochrome-b5 reductase activity;superoxide dismutase activity;binding;protein binding;antioxidant activity;oxidoreductase activity;oxidoreductase activity, acting on NADH or NADPH;oxidoreductase activity, acting on NADH or NADPH, heme protein as acceptor;oxidoreductase activity, acting on NADH or NADPH, quinone or similar compound as ac…	cytoplasm;cytosol;vesicle;membrane-bounded vesicle;neuronal cell body;organelle;membrane-bounded organelle;extracellular organelle;cell body;extracellular region part;intracellular part;cytoplasmic part;cell part;extracellular membrane-bounded organelle;extracellular vesicular exosome;cytoplasm;intracellular part;cell part	xenobiotic metabolic process;nitrogen compound metabolic process;cell communication;cell-cell signaling;aging;metabolic process;biosynthetic process;response to external stimulus;response to endogenous stimulus;cellular process;response to extracellular stimulus;signaling;developmental process;cellular nitrogen compound metabolic process;response to chemical stimulus;cellular metabolic process;sm…	cytoplasm;cytosol;vesicle;neuronal cell body;organelle;extracellular organelle;cell body;cell part;cytoplasm;cell part
NHERF1	sp|O14745|NHRF1_HUMAN	O14745	NHRF1_HUMAN	Na(+)/H(+) exchange regulatory cofactor NHE-RF1	358	0.934789	0.50295	23.259	22.5649	22.5845	22.4505	22.0956	22.3535	5	8	7	4	7	5	5	8	7	4	7	5	5	8	7	4	7	5	29304260	12999690	15904490	11368380	13994412	16564596		1	0.999	8	36	36	36
NAP1L4	sp|Q99733|NP1L4_HUMAN	Q99733	NP1L4_HUMAN	Nucleosome assembly protein 1-like 4	375	0.931981	0.852782	24.4129	23.3073	23.0485	22.9125	22.6256	22.6722	10	10	9	8	9	8	8	9	7	7	7	6	10	10	9	8	9	8	72291968	35967620	33839968	25159512	13199483	22606566		1	0.999	10	54	44	54	chromatin organization;nucleosome assembly;organelle organization;cellular process;cellular component organization;cellular component assembly;cellular macromolecular complex subunit organization;cellular macromolecular complex assembly;nucleosome organization;macromolecular complex subunit organization;chromosome organization;macromolecular complex assembly;protein-DNA complex assembly;protein-D…	binding;protein binding;unfolded protein binding	nucleus;cytoplasm;organelle;membrane-bounded organelle;intracellular organelle;intracellular membrane-bounded organelle;intracellular part;cell part;nucleus;organelle;membrane-bounded organelle;intracellular organelle;intracellular membrane-bounded organelle;intracellular part;cell part;nucleus;organelle;membrane-bounded organelle;intracellular organelle;intracellular membrane-bounded organelle;i…	chromatin organization;organelle organization;cellular process;cellular component organization;cellular component assembly;cellular macromolecular complex assembly;chromosome organization;macromolecular complex assembly;chromatin organization;organelle organization;cellular process;cellular component organization;cellular component assembly;cellular macromolecular complex assembly;chromosome orga…	nucleus;cytoplasm;organelle;intracellular organelle;intracellular membrane-bounded organelle;cell part;nucleus;organelle;intracellular organelle;intracellular membrane-bounded organelle;cell part;nucleus;organelle;intracellular organelle;intracellular membrane-bounded organelle;cell part;nucleus;organelle;intracellular organelle;intracellular membrane-bounded organelle;cell part;nucleus;organelle…
MCM6	sp|Q14566|MCM6_HUMAN	Q14566	MCM6_HUMAN	DNA replication licensing factor MCM6	821	0.929717	0.36301	23.0423	22.8243	22.6616	22.7524	22.2558	22.431	17	18	18	20	14	18	17	18	18	20	14	18	17	18	18	20	14	18	62381772	52833172	52047344	51114868	28875440	41872764		1	0.999	24	105	105	105	G1/S transition of mitotic cell cycle;mitotic cell cycle;nucleobase-containing compound metabolic process;DNA metabolic process;DNA replication;DNA unwinding involved in replication;DNA-dependent DNA replication initiation;DNA strand elongation involved in DNA replication;nitrogen compound metabolic process;cell cycle;metabolic process;biosynthetic process;macromolecule biosynthetic process;cellu…	nucleotide binding;nucleic acid binding;DNA binding;DNA helicase activity;single-stranded DNA binding;catalytic activity;helicase activity;binding;protein binding;ATP binding;pyrophosphatase activity;hydrolase activity;hydrolase activity, acting on acid anhydrides;hydrolase activity, acting on acid anhydrides, in phosphorus-containing anhydrides;purine nucleotide binding;nucleoside-triphosphatase…	nucleus;nucleoplasm;macromolecular complex;MCM complex;organelle;membrane-bounded organelle;intracellular organelle;intracellular membrane-bounded organelle;protein complex;organelle part;intracellular part;chromosomal part;nuclear part;intracellular organelle part;nucleoplasm part;nuclear chromosome part;cell part;nucleus;macromolecular complex;MCM complex;organelle;membrane-bounded organelle;in…	mitotic cell cycle;nucleobase-containing compound metabolic process;DNA metabolic process;DNA replication;nitrogen compound metabolic process;cell cycle;metabolic process;biosynthetic process;cellular process;DNA geometric change;cellular nitrogen compound metabolic process;macromolecule metabolic process;cellular metabolic process;primary metabolic process;nucleobase-containing compound metaboli…	nucleus;nucleoplasm;macromolecular complex;organelle;intracellular organelle;intracellular membrane-bounded organelle;protein complex;cell part;nucleus;macromolecular complex;organelle;intracellular organelle;intracellular membrane-bounded organelle;protein complex;cell part
HNRNPA3	sp|P51991|ROA3_HUMAN	P51991	ROA3_HUMAN	Heterogeneous nuclear ribonucleoprotein A3	378	0.928461	0.561766	24.9018	24.5163	24.5926	24.6161	23.7843	23.9251	12	13	12	15	12	14	12	13	12	15	12	14	14	15	14	17	14	16	119720704	86324008	94033344	89639472	60679704	71752760		1	0.999	16	78	78	90	RNA splicing, via transesterification reactions;RNA splicing, via transesterification reactions with bulged adenosine as nucleophile;nuclear mRNA splicing, via spliceosome;nucleobase-containing compound metabolic process;RNA processing;mRNA processing;nitrogen compound metabolic process;metabolic process;RNA splicing;cellular process;gene expression;RNA metabolic process;mRNA metabolic process;ce…	nucleotide binding;nucleic acid binding;RNA binding;binding	nucleus;nucleoplasm;spliceosomal complex;ribonucleoprotein complex;macromolecular complex;organelle;membrane-bounded organelle;intracellular organelle;intracellular membrane-bounded organelle;organelle part;intracellular part;nuclear part;intracellular organelle part;cell part;catalytic step 2 spliceosome	nucleobase-containing compound metabolic process;RNA processing;mRNA processing;nitrogen compound metabolic process;metabolic process;RNA splicing;cellular process;RNA metabolic process;mRNA metabolic process;cellular nitrogen compound metabolic process;macromolecule metabolic process;cellular metabolic process;primary metabolic process	nucleus;nucleoplasm;spliceosomal complex;ribonucleoprotein complex;macromolecular complex;organelle;intracellular organelle;intracellular membrane-bounded organelle;cell part
HSPA5	sp|P11021|BIP_HUMAN	P11021	BIP_HUMAN	Endoplasmic reticulum chaperone BiP	654	0.927555	0.644553	26.4799	25.5638	25.6813	25.4998	24.984	25.3074	54	42	40	38	39	41	53	41	40	37	38	40	60	45	44	43	41	45	941797120	489010592	517683360	486904896	345348736	449880480		1	0.999	38	254	249	278	cell activation;regulation of protein phosphorylation;platelet degranulation;protein folding;proteolysis;ubiquitin-dependent protein catabolic process;transport;exocytosis;response to stress;ER overload response;ER-nucleus signaling pathway;response to unfolded protein;activation of signaling protein activity involved in unfolded protein response;cell communication;signal transduction;blood coagu…	nucleotide binding;glycoprotein binding;catalytic activity;binding;calcium ion binding;protein binding;ATP binding;pyrophosphatase activity;hydrolase activity;hydrolase activity, acting on acid anhydrides;hydrolase activity, acting on acid anhydrides, in phosphorus-containing anhydrides;ATPase activity;purine nucleotide binding;nucleoside-triphosphatase activity;enzyme binding;protein domain spec…	nucleus;mitochondrion;endoplasmic reticulum;endoplasmic reticulum lumen;endoplasmic reticulum membrane;smooth endoplasmic reticulum;endoplasmic reticulum-Golgi intermediate compartment;plasma membrane;adherens junction;cell-substrate adherens junction;focal adhesion;cell surface;membrane;integral to membrane;cytoplasmic membrane-bounded vesicle;cell junction;cell-substrate junction;integral to en…	cell activation;protein folding;proteolysis;transport;exocytosis;response to stress;cell communication;signal transduction;metabolic process;catabolic process;response to external stimulus;response to biotic stimulus;cellular process;response to extracellular stimulus;vesicle-mediated transport;protein metabolic process;regulation of protein modification process;multicellular organismal process;d…	nucleus;mitochondrion;endoplasmic reticulum;plasma membrane;cell surface;membrane;cytoplasmic membrane-bounded vesicle;midbody;vesicle;macromolecular complex;organelle;intracellular organelle;extracellular organelle;intracellular membrane-bounded organelle;protein complex;cell part
HSP90B1	sp|P14625|ENPL_HUMAN	P14625	ENPL_HUMAN	Endoplasmin	803	0.924168	0.801635	26.172	25.2041	24.9033	24.8456	24.3849	24.6439	44	40	26	38	36	32	38	33	20	32	32	27	47	42	28	41	39	36	719530240	368920576	266200656	258637920	190903424	198797088		1	0.999	39	216	182	233	response to hypoxia;activation of innate immune response;pattern recognition receptor signaling pathway;toll-like receptor signaling pathway;activation of immune response;immune system process;regulation of immune system process;positive regulation of immune system process;immune response-activating signal transduction;innate immune response-activating signal transduction;immune response-regulati…	nucleotide binding;nucleic acid binding;RNA binding;receptor binding;binding;calcium ion binding;protein binding;ATP binding;purine nucleotide binding;enzyme binding;phosphatase binding;protein phosphatase binding;adenyl nucleotide binding;ribonucleotide binding;purine ribonucleotide binding;adenyl ribonucleotide binding;purine ribonucleoside triphosphate binding;ion binding;cation binding;virion…	extracellular region;nucleus;endoplasmic reticulum;endoplasmic reticulum lumen;endoplasmic reticulum membrane;cytosol;plasma membrane;adherens junction;cell-substrate adherens junction;focal adhesion;membrane;cytoplasmic membrane-bounded vesicle;cell junction;cell-substrate junction;midbody;extracellular matrix;organelle membrane;cytoplasmic vesicle;membrane-enclosed lumen;vesicle;vesicle lumen;m…	immune system process;protein folding;proteolysis;transport;endocytosis;response to stress;organelle organization;cytoskeleton organization;signal transduction;metabolic process;catabolic process;cellular process;membrane invagination;protein transport;cellular component organization;cellular membrane organization;vesicle-mediated transport;protein metabolic process;cellular component assembly;re…	extracellular region;nucleus;endoplasmic reticulum;cytosol;plasma membrane;membrane;cytoplasmic membrane-bounded vesicle;midbody;extracellular matrix;vesicle;organelle;intracellular organelle;extracellular organelle;intracellular membrane-bounded organelle;cell part
MGST1	sp|P10620|MGST1_HUMAN	P10620	MGST1_HUMAN	Microsomal glutathione S-transferase 1	155	0.922104	0.978987	25.0529	23.6697	23.9015	23.6283	22.7655	23.2934	4	3	3	4	3	3	4	3	3	4	3	3	4	3	3	4	3	3	63665792	23552168	27339470	25427288	13767672	17866706		1	0.999	3	20	20	20	response to molecule of bacterial origin;developmental process involved in reproduction;organic acid metabolic process;protein complex assembly;peptide metabolic process;cellular amino acid metabolic process;cellular modified amino acid metabolic process;glutathione metabolic process;sulfur compound metabolic process;xenobiotic metabolic process;nitrogen compound metabolic process;response to str…	catalytic activity;glutathione transferase activity;peroxidase activity;glutathione peroxidase activity;binding;antioxidant activity;oxidoreductase activity;amino acid binding;oxidoreductase activity, acting on peroxide as acceptor;transferase activity;transferase activity, transferring alkyl or aryl (other than methyl) groups;carboxylic acid binding;peptide binding;amine binding;glutathione bind…	nucleus;mitochondrion;mitochondrial outer membrane;mitochondrial inner membrane;peroxisomal membrane;endoplasmic reticulum;endoplasmic reticulum membrane;membrane;integral to membrane;organelle inner membrane;outer membrane;organelle membrane;intrinsic to membrane;microbody membrane;mitochondrial membrane;organelle outer membrane;microbody;organelle;membrane-bounded organelle;intracellular organe…	organic acid metabolic process;protein complex assembly;peptide metabolic process;cellular amino acid metabolic process;sulfur compound metabolic process;xenobiotic metabolic process;nitrogen compound metabolic process;response to stress;response to oxidative stress;metabolic process;amine metabolic process;response to biotic stimulus;response to endogenous stimulus;cellular process;cellular comp…	nucleus;mitochondrion;endoplasmic reticulum;membrane;microbody;organelle;intracellular organelle;intracellular membrane-bounded organelle;cell part;apical part of cell;nucleus;endoplasmic reticulum;membrane;microbody;organelle;intracellular organelle;intracellular membrane-bounded organelle;cell part;apical part of cell
CACYBP	sp|Q9HB71|CYBP_HUMAN	Q9HB71	CYBP_HUMAN	Calcyclin-binding protein	228	0.921836	0.621655	23.8797	23.1953	23.142	23.1233	22.4091	22.8197	11	9	12	7	8	8	11	9	12	7	8	8	11	9	12	7	8	8	78540184	40297480	42602248	32561948	23358704	27257990		1	0.999	11	55	55	55	regulation of DNA replication;aging;response to endogenous stimulus;response to hormone stimulus;regulation of biosynthetic process;positive regulation of biosynthetic process;positive regulation of metabolic process;cellular process;response to organic substance;response to inorganic substance;response to metal ion;regulation of macromolecule biosynthetic process;positive regulation of macromole…	binding;protein binding;identical protein binding;protein homodimerization activity;protein dimerization activity	nuclear envelope lumen;nucleoplasm;cytoplasm;beta-catenin destruction complex;organelle envelope lumen;membrane-enclosed lumen;vesicle;membrane-bounded vesicle;macromolecular complex;cell projection;neuron projection;organelle;membrane-bounded organelle;extracellular organelle;protein complex;cell body;extracellular region part;organelle part;intracellular part;nuclear part;cytoplasmic part;intra…	aging;response to endogenous stimulus;cellular process;cell differentiation;developmental process;response to chemical stimulus;response to stimulus;regulation of DNA metabolic process;biological regulation;aging;response to endogenous stimulus;cellular process;cell differentiation;developmental process;response to chemical stimulus;response to stimulus;regulation of DNA metabolic process;biologi…	nucleoplasm;cytoplasm;vesicle;macromolecular complex;cell projection;neuron projection;organelle;extracellular organelle;protein complex;cell body;cell part;cytoplasm;cell projection;neuron projection;cell body;cell part
[truncated: 783 more rows]
[truncated: 1 more columns]
